# 1        **FastMix: A Versatile Multi-Omics Data Integration Pipeline for Cell** 2        **Type-Specific Biomarker Inference**

3                Yun Zhang<sup>1,\*</sup>, Hao Sun<sup>2,\*</sup>, Aishwarya Mandava<sup>1</sup>, Brian D. Aebermann<sup>1</sup>, Tobias R.  
4                Kollmann<sup>3</sup>, Richard H. Scheuermann<sup>1,4</sup>, Xing Qiu<sup>2,#</sup>, Yu Qian<sup>1,#</sup>

5        \* Contributed equally

6  
7        # Correspondence should be sent to: [xing\\_qiu@urmc.rochester.edu](mailto:xing_qiu@urmc.rochester.edu) and [mqian@jcvj.org](mailto:mqian@jcvj.org)

## 8 9        **Affiliations:**

10                <sup>1</sup>Informatics, J. Craig Venter Institute, La Jolla, CA, United States,

11                <sup>2</sup>Biostatistics and Computational Biology, University of Rochester, Rochester, NY, United States,

12                <sup>3</sup>Telethon Kids Institute, Perth Children's Hospital, University of Western Australia; Nedlands,  
13                Australia,

14                <sup>4</sup>Pathology, University of California, San Diego, La Jolla, CA, United States

## 15 16        **Abstract**

17  
18        We developed a novel analytic pipeline - FastMix - to integrate flow cytometry, bulk  
19        transcriptomics, and clinical covariates for statistical inference of cell type-specific gene  
20        expression signatures. FastMix addresses the "large  $p$ , small  $n$ " problem via a carefully  
21        designed linear mixed effects model (LMER), which is applicable for both cross-sectional and  
22        longitudinal studies. With a novel moment-based estimator, FastMix runs and converges  
23        much faster than competing methods for big data analytics. The pipeline also includes a cutting-  
24        edge flow cytometry data analysis method for identifying cell population proportions.  
25        Simulation studies showed that FastMix produced smaller type I/II errors with more accurate  
26        parameter estimation than competing methods. When applied to real transcriptomics and flow  
27        cytometry data in two vaccine studies, FastMix-identified cell type-specific signatures were  
28        largely consistent with those obtained from the single cell RNA-seq data, with some unique  
29        interesting findings.

## 30 Introduction

31 High throughput multi-omics technologies are becoming popular. In a multi-omics study,  
32 different types of sample characteristics of the same subject, e.g., genomics, transcriptomics,  
33 epigenomics, proteomics and metabolomics, are measured using a variety of bioassays. Recent  
34 publications [1-7] have shown that systems biology approaches based on multi-omics  
35 integrative data analysis can effectively identify important patterns that otherwise would be  
36 missed using a single assay. One key challenge for multi-omics data integration is the “large  $p$ ,  
37 small  $n$ ” problem. Each type of assay can measure many analytes. As a result, the total number  
38 of experiment variables ( $p$ ) involved in a multi-omics study is usually large. The number of  
39 experimental subjects and their samples ( $n$ ), however, is usually more limited due to cost and  
40 enrollment capability. When  $p \gg n$ , it is unreliable to infer or interpret the relationship among  
41 the variables using standard regression models.

42 Dimensionality reduction and regularization are two common approaches to address this issue.  
43 Common data dimensionality reduction techniques include linear projection methods such as  
44 principal component analysis (PCA) [8], canonical correlation analysis (CCA) [9] and partial least  
45 squares (PLS) [10], as well as non-linear embedding methods such as t-distributed stochastic  
46 neighbor embedding (t-SNE) [11] and uniform manifold approximation projection (UMAP) [12].  
47 Well-established regularization methods include ridge [13], LASSO [14], and elastic-net [15].  
48 Currently, major efforts in the field of multi-omics integrative analysis focus on using one or  
49 both types of approaches to address the “large  $p$ ” problem. For example, DIABLO [16] uses  
50 sparse generalized canonical correlation analysis (sGCCA) with LASSO penalty to integrate data

51 from multiple omics assays and predict patient's disease type. LUCID [17] uses a joint  
52 probabilistic model with latent variables for integrated clustering regularized by LASSO. In the  
53 emerging single cell genomics field, UMAP and other embedding techniques are frequently  
54 used for the dimensionality reduction purpose for multi-modality data integration [18, 19].  
55 However, the fundamental question of biomarker detection, which requires the integration of  
56 both assay data and clinical covariates with differential analysis, has not been solved.

57 Among the applicable statistical models, linear-mixed effects regression (LMER) is a powerful  
58 and generalizable framework that can be used to address the "large  $p$ , small  $n$ " problem for  
59 multi-omics data integration. Regularized fixed effects regression models have been shown to  
60 solve the "large  $p$ , small  $n$ " issue and reduce the variability in the estimation procedure by  
61 shrinking the estimates toward zero. On the other hand, LMER shrinks the estimates toward the  
62 *fixed effects* instead of zero, so that they have less variability and are less biased [20, 21].

63 However, LMER is not widely applied to high-throughput multi-omics data because of its high  
64 computational cost and numerical instability. Conventionally, a LMER model is solved by an  
65 expectation-maximization (EM) algorithm, which iteratively finds maximum likelihood estimate  
66 of regression parameters [22]. This iterative process is slow and prone to convergence issues,  
67 which makes the LMER almost impossible to be applied to analyze data from high-throughput  
68 studies.

69 To reduce the high computational cost of the iterative EM algorithm, we designed a non-  
70 iterative, moment-based covariance estimator, which is not only more robust than the iterative  
71 EM process but also more efficient, requiring a small fraction of EM's run time. To both

72 demonstrate the utility and evaluate the performance of the proposed approach, we combined  
73 the moment-based estimation of LMER together with downstream differential expression (DE)  
74 analysis into a computational pipeline for inferring cell type-specific differentially expressed  
75 genes (DEGs) from bulk gene expressions and flow cytometry (FCM) data, a problem that is  
76 commonly encountered in immunology studies but not specifically addressed by the existing  
77 multi-omics data integration methods. As shown in Figure 1a, the proposed model – `FastMix`  
78 – takes in three sets of input data: (i) bulk gene expressions measured by microarray or RNA  
79 sequencing; (ii) proportions of cell populations identified from FCM data; and (iii) experiment  
80 covariates and clinical parameters such as demographics, cohorts, and visits of the subjects.  
81 Figure 1b depicts the main steps in the `FastMix` modeling and testing framework and key  
82 techniques to obtain accurate parameter estimations. Expected improvement of parameter  
83 estimation by the `FastMix` is illustrated in Figure 1c.

84 `FastMix` optimizes the bias-variance tradeoff in a way that the DEGs (dots in black) can be  
85 estimated closer to the ground truth than the standard approach (Figure 1c). Figure 1d provides  
86 a schematic representation of the whole analytic pipeline. Unlike traditional unsupervised  
87 analyses that rely on predefined marker genes (which are often incomplete or totally unknown  
88 when the cell types are novel) to define cell types for estimating the cell composition data, our  
89 proposed pipeline integrates the FCM data with bulk gene expression data to supervise the cell  
90 type-specific inference. `FastMix` inference provides a baseline method for cell type-specific  
91 data analysis to complement the cutting-edge single cell transcriptomics assay which still needs  
92 time to be fully mature and widely affordable.

93 In addition, the pipeline depicted in Figure 1d addresses the analysis of FCM data by including a  
94 cutting-edge computational method – DAFi [23] – to identify composition/proportions of the  
95 cell populations. It makes the pipeline advantageous over the existing data integration  
96 approaches when the scientific study includes FCM assay data. The DAFi-based analysis  
97 improves not only the reproducibility of the FCM data analysis but also the accuracy of the  
98 proportions of the cell populations for improving the downstream `FastMix` inference. It is  
99 important to note that the pipeline depicted in Figure 1d can be applied to analyze other types  
100 of multimodal datasets for compositional and bulk profiling integrative analysis. For example,  
101 multimodal data from metagenomics and metabolomics assays commonly include bulk analysis  
102 and composition of microbial communities for which `FastMix` can be applied to identify the  
103 community-specific biomarkers. `FastMix` is freely accessible as an open source package at  
104 <https://github.com/terrystun0302/FastMix>.

## 105 **isResults**

### 106 ***Fast unfolding of cell type mixture by integrating multimodal omics data***

107 `FastMix` is primarily designed to integrate two popular assays – flow cytometry and  
108 transcriptome profiling – in multi-omics studies. In this scenario, `FastMix` takes in three sets  
109 of input data: (i) clinical covariates (denoted as **Clin**), such as age, sex, treatment group, (ii) cell  
110 type proportions measured by flow cytometry assays on heterogeneous populations (denoted  
111 as **Cell**), and (iii) bulk gene expression measured by microarray or RNA sequencing (denoted as  
112  $Y$ ;  $Y$  is a sample-by-gene matrix following the regression model convention). Without  
113 `FastMix`, separate regression models can be used to quantify the linear associations between

114 two out of the three data inputs, i.e., associations between  $Y$  and **Clin**, associations between  $Y$   
115 and **Cell**, or associations between **Cell** and **Clin**. `FastMix` simultaneously studies the  
116 associations between all three sets of variables in the following unified linear regression model

$$Y = XW + E,$$

117 where  $X$  is a three-component design matrix,  $X := (\mathbf{Cell} \quad \mathbf{Clin} \quad \mathbf{Cell} \times \mathbf{Clin})$ ,  $W$  is a matrix of  
118 regression coefficients (weights) to be estimated, and  $E$  is a matrix of errors. By including the  
119 interaction term **Cell**  $\times$  **Clin**, `FastMix` makes cell type-specific inferences beyond the bulk  
120 level analysis. Typically, the above model is an under-determined system. `FastMix` reduces  
121 the model complexity by using the linear mixed effects regression (LMER) techniques. It  
122 introduces the gene-specific mixed effects, such that  $\beta_{li} = \beta_l + \gamma_{li}$ , where  $\beta_l$  is the *fixed effect*  
123 of the  $l$ th covariate to the entire transcriptome, and  $\gamma_{li}$  is the gene-specific *random effect* of  
124 the  $i$ th gene. `FastMix` also provides a computational algorithm that is much faster than the  
125 traditional expectation-maximization (EM) algorithm to solve large-scale LMER model with  
126 high-throughput data. The `FastMix` algorithm is a non-iterative procedure that uses a novel  
127 moment-based estimator for the covariance matrix of random effects (denoted as  $\hat{B}_T$ ). Of note,  
128 `FastMix` estimates the covariance matrix with outlier trimming and bias correction, therefore  
129 it is robust to numerical aberrations induced by outliers and DEGs in the data. Estimates of the  
130 fixed effects ( $\hat{\beta}_l$ ) and random effects ( $\hat{\gamma}_{li}$ ) can then be computed using the weighted least  
131 squares (WLS) and empirical best linear unbiased predictor (EBLUP) techniques. (See Figure 1b  
132 and the Methods section for more details.)

133 The overarching goal of the `FastMix` model is to perform DE analyses with respect to the  
134 components in the design matrix. Though no classical hypothesis test can be applied to the  
135 random effects for theoretical reasons; in practice, `FastMix` introduces a novel competitive  
136 test with quasi- $p$ -value to identify DEGs that have significantly larger or smaller predicted  
137 random effects  $\hat{\gamma}_{li}$  (i.e., cell type-specific effects) to practically rank the importance of genes in  
138 the whole transcriptome. To this end, `FastMix` incorporates a DEG indicator, and assigns the  
139 random effects a mixture distribution conditional on the DEG indicator based on empirical  
140 Bayes method [24, 25]. For each component of the design matrix, `FastMix` inference on  
141 *random effects* can be interpreted as:

- 142 • **Cell** – detection of cell type signature genes that distinguish cell types from each other,
- 143 • **Clin** – bulk-level gene expression differential analysis,
- 144 • **Cell  $\times$  Clin** – cell type-specific differential analysis, i.e., cell type-specific DEGs.

145 Note that `FastMix` is able to incorporate arbitrary weight matrices at the sample level, which  
146 can be used to account for the serial correlation in longitudinal studies. We will provide some  
147 practical guidance on how to construct such a weight matrix in the Methods section. We refer  
148 to this model as the weighted `FastMix` model. `FastMix` with known weights is shown to  
149 perform better than `FastMix` without weight if the data are known to fail the independent  
150 and identically distributed assumption (please see Supplementary Material, Section 2.3 and 3.5).

151 In the rest of this section, we illustrated the properties of `FastMix` in extensive simulation  
152 studies. In two real data studies, we applied (weighted) `FastMix` to carry out cell type-specific

153 inference with a focus on neutrophils in a hepatitis B virus (HBV) vaccine study and a focus on  
154 lymphocytes in an influenza infection study. We chose these two cell populations because  
155 neutrophils play important roles in pathogenesis of liver diseases and immune responses to  
156 HBV vaccines [26, 27]. Also, influenza infection is known to be associated with a relative  
157 lymphopenia/neutrophilia ratio [28].



158 ***Simulation I: the effect of trimming and robustness estimation of covariance matrix***

159 We designed simulation I to illustrate the advantage of the moment-based covariance matrix  
160 estimator. For illustration purpose, we considered two cell types, namely Cell1 and Cell2, whose  
161 random effects are  $\gamma_{1i}$  and  $\gamma_{2i}$ , respectively. Figure 1c shows the effect of the proposed  
162 embedded robust covariance estimator  $\hat{B}_T$  (green ellipse) for estimating the true covariance  
163 matrix between the random effects  $B$  (black ellipse). In the simulation, we generated 5000  
164 genes (dots); among them, 250 genes were true DEGs (black dots) in the direction of Cell1, i.e.,  
165 Cell1-specific DEGs. Note that the existence of true DEGs can be considered as outliers under  
166 the null hypothesis [29, 30] that may lead to over-estimation of the covariance matrix. In the  
167 estimation procedure of FastMix, an initial covariance estimator (red ellipse) was constructed  
168 first using the ordinary least squares (OLS) regression technique (see the Methods section),  
169 which is non-robust to bias caused by DEGs. Trimming and bias correction techniques were  
170 then applied to re-estimate the initial estimated covariance matrix. Simulation I showed that  
171 the final estimator  $\hat{B}_T$  was robust to the existence of outliers (DEGs), and accurately  
172 recapitulated the true covariance matrix, i.e., the overlay of the green ellipse and the black  
173 ellipse.

174 ***Simulation II: comparing performance of FastMix with other regression models***

175 Simulation II was conducted to verify the statistical and computational properties of the  
176 proposed method. We generated synthetic gene expression values for 5000 genes and 50  
177 subjects. For each subject, we generated three cell proportions (Cell1, Cell2, and Cell3), one  
178 continuous clinical covariate (Severity), and one categorical clinical covariate (Sex). In the

179 simulation design, four scenarios were considered: with or without true DEGs, and with or  
180 without correlation between random effects. Simulation details are described in the Methods  
181 Section.

182 Here, we systematically evaluated the computational efficiency and accuracy for estimating  $B$ ,  
183 the covariance matrix of random effects. The `FastMix` model is a special case of LMER, with  
184 robust estimation of  $B$  and bias-correction procedure for fixed effect. The standard  
185 implementation of LMER in R is the `lme4` package, which uses an iterative expectation-  
186 maximization (EM) algorithm to obtain the maximum likelihood estimator for  $B$ . The `lme4`  
187 implementation is very time-consuming for estimating the full covariance matrix  $B$ . In practice,  
188 users may specify an independent correlation structure, i.e., assuming no correlation between  
189 random effects thus  $B$  is diagonal. The `lme4` implementation with independent assumption  
190 (`lme4_ind`) is more efficient than the default `lme4` implementation since much simpler  
191 covariance structure is assumed in the model. Similarly, we also implemented the independent  
192 assumption for the random effects in the `FastMix` algorithm (`FastMix_ind`). For the  
193 completeness of comparison, we reported the time consumed in seconds and mean square  
194 error (MSE) for estimating  $B$  using `lme4_ind`, `lme4`, `FastMix`, and `FastMix_ind` under the  
195 four simulated scenarios in Table 1a.

196 Table 1a showed that, when the random effects were independent and without DEGs,  
197 `lme4_ind` was the theoretically best approach and had the lowest MSE. While the accuracy of  
198 `lme4_ind` and `FastMix_ind` were both at the minimal level (MSE = 0.02 and MSE = 0.04,  
199 respectively), `FastMix_ind` used only 2% of the computational time of `lme4_ind`. When the

200 random effects were correlated and without DEGs, `FastMix` had the smallest MSE (0.21) and  
201 was more than 300 times faster than the full-pledged `lme4` algorithm, which had the second  
202 best MSE (0.32). For the simulation scenarios with DEGs, the `FastMix` implementations were  
203 always (with or without correlation) the best performers with the smallest MSEs and used tiny  
204 amount of computational time. The `lme4`-based approaches were not able to obtain accurate  
205 estimates, because the maximum likelihood estimator used in `lme4` was not robust to effects  
206 introduced by DEGs (outliers). On the other hand, `FastMix` was robust to these effects due to  
207 the use of trimming. In Supplementary Material, sections 3.2 and 3.3, we also showed that  
208 `FastMix` greatly reduced the bias in the fixed effect estimation compared to the `lme4`  
209 approach and other robust covariance estimators [31-33]. Among all the methods compared,  
210 `FastMix` had the most robust performance (Supplementary Material, Tables 1 and 3).

211 Next, we compared `FastMix` with ordinary least square (OLS) and Ridge regression for  
212 regression coefficient estimation. One primary reason to use LMER instead of the standard OLS  
213 regression is to reduce the variability of the estimated regression coefficients. For the same  
214 purpose, Ridge regression is also well-known for stabilizing the regression coefficients using  
215 regularization. In the second simulation, we compared the accuracy of estimating the gene-  
216 specific linear coefficients  $\beta_{li}$ , using `FastMix`, OLS, and Ridge regressions. We considered the  
217 most real simulation scenario, i.e., with correlation and DEGs, for this evaluation. The  
218 regularization parameter in ridge regression was selected by the generalized cross-validation  
219 (GCV) criterion. Table 1b showed that, `FastMix` had the smallest total MSE among the three  
220 compared methods. In this simulation, the standard deviations of `FastMix` and Ridge (0.017  
221 and 0.046, respectively) were both much smaller than that of OLS (0.2), suggesting that both

222 methods could achieve the shrinkage effect, i.e., stabilizing the regression coefficients. A closer  
223 look at the biases of individual coefficients suggested that the `FastMix` and OLS estimates  
224 could be regarded as practically unbiased. On the other hand, estimates of Ridge regression had  
225 large bias, because the  $L^2$  regularization in Ridge regression shrank the estimates toward zero  
226 [13], not the fixed effects.

227 ***Simulation III: Comparing `FastMix` with existing cell type-specific differential analysis***  
228 ***method***

229 Shen-Orr et al. proposed csSAM [34] – a cell type-specific differential analysis method for  
230 heterogeneous biological samples using gene expression data and relative cell type frequencies.  
231 csSAM is also a regression-based model solved by the standard OLS technique; and the  
232 differential analysis is conducted by the established SAM [35] pipeline for bulk gene expression.  
233 A major limitation of csSAM is that it only performs two-group comparison, i.e., one binary  
234 covariate. For a fair comparison, we redesigned a simpler simulation study for the same  
235 number of genes and subjects, which had three cell proportions (Cell1, Cell2, and Cell3) and one  
236 binary covariate (Group), to compare the type I error rate, power, and computational time for  
237 cell type-specific DEG detection using `FastMix` and csSAM. By design, there were true cell  
238 type-specific DEGs for Cell1 and Cell2, but not Cell3; two scenarios with and without correlation  
239 between random effects were also considered. Simulation details are described in the Methods  
240 Section.

241 Table 1c-e showed the simulation performance of the two cell type-specific methods. In both  
242 correlation and no correlation scenarios, `FastMix` had acceptable type-I error rate (5%~7%),

243 while csSAM had much higher type-I error rate than FastMix in all cases (Table 1c); FastMix  
244 also had better statistical power (on average 65%) for detecting Cell1-specific and Cell2-specific  
245 true DEGs than csSAM (on average 50%) in the simulation (Table 1d). Overall, FastMix not  
246 only showed superior performance in the simulation results, but also used just 1/10 of the  
247 computational time of csSAM (Table 1e).

248 In Supplementary Material, Section 3.4, we showed that when there were more up-regulated  
249 DEGs and fewer down-regulated DEGs in a slightly different simulation, similar patterns of the  
250 type-I error, statistical power, and computational efficiency performance were observed for  
251 both methods as those shown in Table 1c-e.

252 FastMix *multi-omics integration reveals consistent cell type-specific signature genes with*  
253 *scRNA-seq technology*

254 We applied FastMix to a multimodal study that investigates immune responses to the  
255 licensed hepatitis B vaccine – Engerix-B – for the Human Vaccine Project (HVP) [36]. The HVP01  
256 study [37] contains well used assays on whole blood or peripheral blood mononuclear cell  
257 (PBMC) samples from adults with wide age range (40-80 years old), including flow cytometry for  
258 immunophenotyping, RNA-seq for bulk transcriptomics, and virus neutralization assay for  
259 serum antibody titers (anti-HBs). In addition, this study also has scRNA-seq data for immune  
260 cells using the Smart-Seq2 [38] protocol, which we would use as the ground truth to validate  
261 our FastMix results.

262 Engerix-B requires three doses to reach clinically proven immune protection [39]. In the HVP01  
263 study, there are 15 subjects. After Dose 3, all subjects responded to vaccination, but some had  
264 much higher immune protection measured by the anti-HBs titer than others (Supplementary  
265 Figure S1). We grouped subjects who had anti-HBs titer >5000 mIU/mL after Dose 3 as high  
266 responders (5 subjects), and otherwise low responders (10 subjects). Immunophenotyping by  
267 flow cytometry and gene expression by RNA-seq of whole blood and single immune cells were  
268 collected at 5 time points (Day 0,1,3,7, and 14). Based on the markers used in the flow  
269 cytometry panels, we identified the abundant neutrophils (CD45+ CD66+), non-neutrophils  
270 (CD45+ CD66-), and rest populations (Figure 2a) following the DAFi gating hierarchy [23] (see  
271 the Methods section). Using all time points, we fitted a weighted `FastMix` model for the bulk  
272 RNA-seq gene expression with a design matrix of cell proportions, clinical covariates including  
273 response group and age (Supplementary Figure S1), and their interactions.

274 First, we looked at the DEG list of the main terms, which can be interpreted as the signature  
275 genes of each cell population. Broadly speaking, these signature genes are differentially  
276 expressed in the specific cell population when compared with the rest of the cell populations.  
277 Out of the 13,157 genes available in the processed bulk RNA-seq data, `FastMix` identified 851  
278 signature genes for the neutrophil population, 520 signature genes for the non-neutrophil  
279 population, and 30 signature genes for the rest population. Because the rest population is the  
280 most heterogenous population, we would expect that not many signature genes could be  
281 identified for the rest population that contained a mixture of cell types.

282 To validate the `FastMix` signature genes for the well-defined cell population (i.e., neutrophils),  
283 we used a completely independent assay data from the unbiased scRNA-seq whole  
284 transcriptome expression profiling. We followed a standard scRNA-seq analysis pipeline  
285 including low-dimensional embedding of cells on UMAP [40] with cell clusters color labeled by  
286 the ground truth cell types based on cell surface markers in FCM sorting, and scRNA-seq DE  
287 analysis by a nonparametric hypothesis testing approach [41] for cell type DE gene detection  
288 for scRNA-seq data, which were conceptually comparable with the signature genes detected by  
289 `FastMix`. UMAP visualization of the ground truth cell types (Figure 2b) showed a good  
290 separation of the neutrophil population from other cell populations. We applied the scRNA-seq  
291 DE analysis to detect DEGs between the neutrophils and all other cells, which identified 2,744  
292 neutrophil cell type DE (a.k.a. signature) genes from 58,036 annotated genes in total.

293 We compared the `FastMix` and scRNA-seq results of neutrophil signature genes in Figure 2c.  
294 The majority (>50%) of the `FastMix` signature genes overlapped with the scRNA-seq signature  
295 genes. Specifically, 72% of the top 100 `FastMix` signature genes were consistent with the  
296 scRNA-seq signature genes. The overlapping rate gradually decreased as we included more top  
297 genes in the comparison, meaning that `FastMix` ranked more “ground truth” (scRNA-seq)  
298 signature genes at the top in its DEG list. For pragmatic use, we further selected 365 scRNA-seq  
299 signature genes that have substantial fold change (FC), i.e.,  $|\log_{2}FC| > 1$ . The Venn diagram  
300 (Figure 2d) showed that 39 of the top 100 `FastMix` signature genes were overlapped with the  
301 selected scRNA-seq signature gene list, suggesting that the `FastMix` signature genes were not  
302 only close to the scRNA-seq ground truth, but also contained more practically useful genes in  
303 the top ranked genes (16% of the scRNA-seq signature genes passed the logFC threshold vs. 39%

304 of the top 100 `FastMix` signature genes passed the logFC threshold). Among the 39 common  
305 genes, many of them are highly relevant to both neutrophils and Hepatitis B, e.g., *CXCR1/2*  
306 plays an important role [26] in hepatic inflammatory response [42]. The same can be seen for  
307 the interferon-induced proteins from *IFIT* and *IFITM* family genes (the 39 genes include *IFIT2*,  
308 *IFITM2*, *IFITM3*, etc.) Furthermore, we plotted the scRNA-seq expression values of the 39  
309 common signature genes across all cell types (Figure 3a), compared with the bottom genes  
310 (Figure 3b) and top (Figure 3c) genes identified by `FastMix` in violin plots. It is clear to see  
311 abundant gene expression in the neutrophils for common and top `FastMix` signature genes,  
312 but almost no expression in the bottom genes.

### 313 ***Identifying cell type-specific interferon signaling pathway genes after Hepatitis B vaccination***

314 ***using*** `FastMix`

315 Next, we compared `FastMix` and `csSAM` for identifying the cell type-specific DEGs. With the  
316 above `FastMix` model of HVPO1 study, we focused our comparison on the neutrophil-specific  
317 DEGs with respect to the response group (since `csSAM` only performs two-group DE analysis for  
318 the cell type-specific SAM model). `FastMix` identified 495 neutrophil-specific DEGs at 5% false  
319 discovery rate (FDR); however, `csSAM` identified 0 DEG at the same 5% FDR level (the default  
320 significance level used in `csSAM`).

321 Further, we performed pathway enrichment analysis with top cell type-specific genes ranked by  
322 both `FastMix` and `csSAM`. Using the step-by-step `csSAM`, we obtained the 100 top ranked  
323 genes based on `csSAM` estimated FDR. For fair comparison, we also extracted the top 100  
324 `FastMix` cell type-specific DEGs, and fed both `FastMix` and `csSAM` top 100 genes to the



325 ReactomePA [43] R package for pathway enrichment analysis. FastMix identified 45, 8, and 1  
326 significant cell type-specific pathways for the neutrophils, non-neutrophils, and rest population,  
327 respectively (Supplementary Table S1-S3). Figure 4a showed the enriched pathways identified  
328 by the top 100 FastMix neutrophil-specific DEGs for high responders. The interferon (IFN)  
329 immune signaling pathways were substantially presented in the high responder group,  
330 including Interferon Signaling, Interferon alpha/beta signaling, Antiviral mechanism by IFN-  
331 stimulated genes, Interferon gamma signaling (the top 4). In comparison, using the top 100  
332 csSAM gene list for each cell type, no enriched pathway was identified for the neutrophil  
333 population, only one pathway – neutrophil degranulation – was identified for the non-  
334 neutrophil population, and five pathways for the rest population (Supplementary Table S4).

335 Besides the significant pathways, we also extracted the unique genes that contributed to the  
336 enriched pathways from the top 100 FastMix neutrophil-specific DEG list with respect to  
337 response group (Figure 4b). In particular, we identified *BST2* (Tetherin/CD317), which is a key  
338 host cell defense molecule in response to stimuli from IFN pathway [44, 45]. Traditional  
339 understanding of *BST2* expression is with mature B cells and plasmacytoid dendritic cells while  
340 it has cell type-dependent variation [46]. Our analysis showed that *BST2* was also expressed in  
341 neutrophils, whose increased expression level (estimated linear coefficient = 1.016; please see  
342 Methods section for coefficient estimation) was correlated with the high anti-HB levels after  
343 Dose 3 of Engerix B.

344 ***Inferring cell type-specific temporal pattern from longitudinal data using FastMix***

345 The NIH-funded ImmPort [47] Shared Data portal ([www.immport.org/shared/home](http://www.immport.org/shared/home)) shares  
346 various immunology studies with the research community. For systems immunology, the  
347 activation of immune cell response is a dynamic process; therefore, longitudinal data are  
348 commonly collected to investigate how the immune system responds to a certain vaccine or  
349 treatment at multiple time points. It is particularly challenging to systematically integrate multi-  
350 omics data over a set of time points. We downloaded SDY180 from ImmPort, which employs  
351 the systems immunology approaches to investigate immune responses to Influenza (Fluzone®  
352 2009–2010 seasonal influenza vaccine) and Pneumococcal (Pneumovax23® 23-valent  
353 pneumococcal vaccine) vaccines [48]. For the Influenza arm, we identified 102 samples that  
354 have paired flow cytometry and microarray gene expression data for 12 subjects over 8 or 9  
355 time points; for the Pneumococcal arm, we have 100 samples of 12 subjects over 8 or 9 time  
356 points (Supplementary Table S5). The subjects' age range from 20-50 years old; and the nine  
357 time points span from 7 days before vaccination to 28 days after vaccination. In the weighted  
358 `FastMix` model that we fitted, we included both age and time point as model covariates.

359 Following the DAFi gating hierarchy (see the Methods section), we identified lymphocytes,  
360 granulocytes, monocytes, and rest population from multiple flow cytometry panels for SDY180  
361 (Figure 5a and Supplementary Figure S2). The temporal pattern of the cell proportion changed  
362 over time for the Influenza arm are shown in Figure 5b. With only the flow cytometry data, we  
363 noticed that the proportion of lymphocytes had a substantial drop on Day 1 after vaccination  
364 and was recovered by Day 3.

365 Using a simple pre-post (i.e. between two days) comparison, the original SDY180 study [48]  
366 curated an interferon module, namely M1.2, that includes genes showing significant *global*  
367 changes in blood transcript abundance between the baseline Day 0 and Influenza Vaccine Day 1.  
368 In bulk level, representative genes (*CXCL10*, *IFIT1*, and *LAMP3*) in the M1.2 module showed  
369 consistently a peak in gene expression on Day 1 after vaccination (Figure 5c and Supplementary  
370 Figure S3), confirming the global finding; the temporal plots also show that the bulk expression  
371 of these genes fell back to around the baseline level on and after Day 3.

372 Applying FastMix to the Influenza arm, we could further designate the *specific* cell population  
373 that are associated with the temporal activation of these interferon genes. Among the 24 gene  
374 in M1.2 module, FastMix identified 22 genes with highly significant *p*-values ( $< 0.05$ ) for  
375 lymphocyte-specific differential expression (Figure 5d and Supplementary Table S6); the top 9  
376 M1.2 genes ranked in the top 1% (out of 10732 genes) of the lymphocyte-specific DE list.  
377 However, the majority of the M1.2 genes showed no significance in granulocytes and  
378 monocytes (Supplementary Table S6). These results strongly indicate that the activation of the  
379 interferon module is lymphocyte-specific: the differential expression of interferon signaling  
380 genes are driven by the up-regulation of the lymphocyte-specific expression. Though the  
381 proportion of lymphocytes decreased on Day 1 after vaccination (Figure 4b), the bulk gene  
382 expression of M1.2 genes increased on Day 1 (Figure 4c). The FastMix statistical inference  
383 precisely linked the temporal changes in Figure 4b for lymphocytes and Figure 4c for those  
384 interferon-stimulated genes. Furthermore, FastMix produced positive estimated coefficients  
385 for lymphocytes for all M1.2 genes (Supplementary Table S7), confirming the up-regulation of  
386 the cell type-specific gene expression.

387 We also looked at the cell type and age interaction terms. The lymphocyte-specific  $p$ -values  
388 w.r.t. age for the M1.2 interferon module genes showed very strong significance (23 out of 24  
389 significant  $p$ -values) (Figure 4e and Supplementary Table S8), whose coefficient estimates  
390 showed negative association between the subject age and lymphocyte-specific expression  
391 (Supplementary Table S7 and Supplementary Figure S4).

392 For completeness of method comparison, a plausible csSAM analysis would be only to compare  
393 the pre- and post-vaccination groups for cell type-specific DEGs due to technical limitations.  
394 Even for the simple two-group test, the csSAM approach is suboptimal, because there is no  
395 appropriate way to handle the within-subject correlation structure in the multiple time points.  
396 Therefore, no significant cell type-specific DEGs w.r.t. the pre- and post-vaccination groups  
397 were identified at the 5% FDR level. Using the top 100 csSAM gene list for each cell type, no  
398 enriched pathway was identified for any cell type, suggesting that csSAM is inadequate for  
399 performing cell type-specific DE analysis with complex study design.

400 Lastly, applying `FastMix` to the Pneumococcal arm, only one significant  $p$ -value was obtained  
401 in Figure 4c-d (Supplementary Table S6 and S8). Clearly, the lymphocyte-specific interferon  
402 activation was only observed in the Influenza arm, but not the Pneumococcal arm, agreeing  
403 with the existing knowledge in PBMC samples [48]. The Pneumococcal arm may serve as the  
404 “true negative” for our method validation; and the non-significant results showed the  
405 “specificity” of the `FastMix` method.

406 ***Discriminant Analysis after*** `FastMix`

407 Because `FastMix` is designed to take multiple types of input variables including clinical  
408 parameters, it can be used to identify the relationship between the independent (e.g., subject  
409 demographics) and dependent variables (e.g., response to a vaccination). For example, in our  
410 experiment using the HBV vaccination data in the HVP01 study, when the subjects were  
411 grouped into responding and non-responding, `FastMix` could calculate four scores for  
412 discriminating purpose: (a) `single_score`, an 1-dimensional score based on all input genes; (b)  
413 `single_sparse_score`, a 1-dimensional score based on genes with significant interactions with  
414 the response; (c) `multi_score`, an n-dimensional score based on all genes; and (d)  
415 `multi_sparse_score`, a multivariate score based on genes with significant interactions with the  
416 response (see Supplementary Material, Section Discriminant Analysis after `FastMix`, for  
417 technical details). Figure 4c-d showed that the discriminative scores (for straightforward  
418 illustration, `single_sparse_score` was used in the Figure) can be plotted to identify whether age  
419 is an informative factor in the discriminative analysis (i.e., classification of responding vs non-  
420 responding subjects). We can clearly see the significant (Wilcoxon  $p$ -value =  $1.9e^{-16}$ ) difference  
421 between the responding (yellow) and non-responding (grey) groups when age was included in  
422 the analysis (Figure 4c), while the difference was unclear without the age (Figure 4d). This tells  
423 us that age is an important variable that is highly relevant in host immune response to the HBV  
424 vaccine.

## 425 **Discussion**

426 Using extensive simulation studies, we showed that: (i) regression coefficients estimated by  
427 `FastMix` had comparable mean squared errors (MSE) as those computed from `lme4` - the

428 reference implementation of LMER model based on EM algorithm, (ii) depending on settings,  
429 `FastMix` was at least 25 times, and in some cases more than 300 times faster than `lme4`, and  
430 (iii) `FastMix` was substantially more accurate (measured by MSE) than the ordinary least  
431 squares (OLS) and Ridge regression. See Table 1 for more details.

432 In addition, we compared the type-I error rate and statistical power of `FastMix` for cell type-  
433 specific differential expression (DE) analysis with an existing pipeline, `csSAM` [34], using both  
434 simulations and real data. `FastMix` achieved slightly better statistical power with much lower  
435 type-I error than `csSAM`, using about 10% of `csSAM`'s run time (see Table 1c-e). We applied the  
436 `FastMix` pipeline to analyze the multimodal data from two clinical studies [37, 48] that  
437 measured host responses to three different vaccines (influenza, pneumococcal, and hepatitis B).  
438 Input data included bulk gene expressions, FCM, as well as clinical covariates including vaccine  
439 responding groups defined by serum antibody titers as well as time points for multiple vaccine  
440 doses. A common bottleneck in evaluating multimodal data integration methods using real data  
441 is the lack of ground truth. Performance assessment of many preexisting methods relies on  
442 subjective interpretation of their data integration results using existing knowledge. In contrast,  
443 we addressed this issue by using single cell RNA-seq (scRNA-seq) data available in one of the  
444 studies as an objective gold standard. Excitingly but not surprisingly, DEGs selected by  
445 `FastMix` overlapped significantly with those selected by the cutting-edge analysis of the  
446 scRNA-seq data. On the other hand, `FastMix` seemed to be able to select biologically  
447 important genes for neutrophils that were missed by the scRNA-seq analysis.

448 The general contribution of `FastMix`, from a statistical perspective, is the extension from the  
449 traditional pairwise linear associations between multi-omics data types into a multiple  
450 regression model with both fixed and random effects (LMER) that can take multiple types of  
451 inputs simultaneously and infer cell type-specific biomarkers as well as signature genes based  
452 on cohorts defined by experiment variates or clinical parameters. One roadblock for realizing  
453 the LMER analysis in practice is the complex and slow iterative EM algorithm for estimating the  
454 regression parameters. We solved this issue by an efficient moment-based method that  
455 achieved similar accuracy as EM but using only a fraction of its run time (Table 1a). Note that  
456 this method includes both trimming and the corresponding bias-correction, so that the  
457 estimated covariance structure (used in the LMER) is robust to outliers and practically unbiased.  
458 It is important to note that the LMER construction in `FastMix` also addressed the collinearity  
459 issue in an interpretable way, without needing a black-box non-linear transformation used in  
460 many of the existing multi-omics data integration approaches. Inspired by competitive tests  
461 used in gene set enrichment analyses [49-51], we designed a quasi- $p$ -value to rank and select  
462 genes with significantly larger/smaller random effects (cell-type-specific effects) than most  
463 other genes. We believe this approach may be applicable in other situations.

464 `FastMix` provides an end-to-end solution for integrative analysis of flow cytometry (FCM)  
465 data and bulk transcriptomics data. FCM and transcriptomics are commonly used in  
466 immunology studies. Among the 1924 experiments in the 495 studies collected by US NIAID's  
467 ImmPort database (<https://immport.org/shared/home>) as of June 2021, the top two assay  
468 types are FCM (706; 36.7%) and transcription profiling (213; 11.1%). However, existing solutions  
469 for integrating data from transcriptomics and FCM assays for cell type-specific immune profiling

470 are suboptimal. FCM data analysis mainly relies on subjective manual gating analysis, which is  
471 difficult to be integrated with other computational modules. Identification of cell type-specific  
472 signature genes and DEGs relies on predefined marker genes in the transcriptomics data,  
473 without utilizing the FCM data that provide canonical phenotypic definitions of the cell types.  
474 We previously developed a computational method – DAFi [23] – to identify cell populations  
475 from FCM data in an objective way, which produces more accurate proportions of cell  
476 populations in the biological sample than the subjective manual gating analysis [23, 52].  
477 Combining DAFi and *FastMix* (Figure 1d) produces a novel unbiased solution for  
478 immunologists to identify cell-based biomarkers, including DEGs and cell populations with  
479 significantly different abundances between cohorts, from the FCM and transcriptomics data.

480 Besides synthetic data, using scRNA-seq data provides ground truth for assessing the  
481 performance of *FastMix*. The consistency between *FastMix* and scRNA-seq from our  
482 experiment (Figure 3) showed that *FastMix* can be used to infer cell type-specific knowledge  
483 from bulk transcriptomics and FCM data. However, *FastMix*-identified biomarker genes are also  
484 complementary to results of the scRNA-seq data analysis. For example, *FastMix* identified the  
485 neutrophil-specific genes *MMP9* and *RSAD2/Viperin* (Figure 3c), which were not found in the  
486 scRNA-seq data analysis (Figure 3a). *MMP9* is a regulatory factor in neutrophil migration [53]  
487 and *Viperin* is an important anti-viral protein induced in neutrophils [54] (Figure 3c). Also,  
488 *FastMix* identified the IFIT gene family members (*IFIT1*, *IFIT2*, and *IFIT3*) that can limit the  
489 HBV replication [55]. Basically, *FastMix* provides an *in-silico* alternative when scRNA-seq data  
490 is unavailable or unreliable. Besides inferring the cell type-specific signature genes, *FastMix*  
491 can produce discriminative scores of model variables, which quantify the contributions of



492 model variables to the sample classification. This is a unique and novel feature that previous  
493 models have not provided.

494 The main limitation of `FastMix` is that it does not solve the well-known problem for  
495 inferring characteristics of rare cell populations from bulk assay data. When the proportion of a  
496 cell population is small, its contribution to the bulk gene expressions is easily overwhelmed by  
497 the abundant cell populations. Even a minor change in gene regulation of the major cell types  
498 can dominate the variation of the bulk gene expressions. This challenge can potentially be  
499 solved if there are replicates of the same measurement, which are unfortunately usually  
500 unavailable in most biomedical studies. Ideally, scRNA-seq, bulk transcriptomics, as well as FCM,  
501 when available, can be integrated together for achieving the optimal performance for  
502 identifying cell-based DEGs and other biomarkers for both abundant and rare cell types in the  
503 whole cell type hierarchy. The estimation can also benefit from longitudinal (and repeated)  
504 measurements when they are available, which will be investigated in our future work  
505 Applications of `FastMix` can be easily extended to include metagenomics and metabolomics  
506 data. For example, a straightforward application of `FastMix` is to identify genetic factors  
507 across species to explain variation of metabolomic profiles based on microbial community  
508 composition data. `FastMix` allows us to do “reverse engineering” from observed metabolite  
509 abundances in diverse microbiome communities to infer species-specific contributions.

## 510 **Figure Legend**

511 **Figure 1. FastMix schematics and analytical pipeline. (a)** FastMix takes three input data  
512 matrices: a bulk gene expression matrix, a matrix of cell type proportions, and a matrix of  
513 clinical covariates (both continues and categorical). **(b)** Flow chart of key steps of FastMix.  
514 (Details please refer to complementary material.) i. The FastMix model utilizes linear mixed-  
515 effects regression (LMER) model and mixture distribution to construct a unified regression  
516 model for the three data inputs. ii. Reparametrize the FastMix model by vectorization and  
517 Kronecker product so the data can be analyzed in a unified LMER model. iii. The FastMix  
518 algorithm gains computational efficiency through using a novel moment-based estimator of the  
519 covariance matrix  $\hat{B}^{(0)}$ , followed by solving for the fixed effects estimate  $\hat{\beta}^{(1)}$  and the random  
520 effects estimate  $\hat{\gamma}_i^{(1)}$ , both of which depend on  $\hat{B}^{(0)}$ . iv. In FastMix, DEG identification is  
521 viewed as an outlier detection problem. It uses a trimming technique to improve the robustness  
522 due to the existence of DEGs (outliers). v. After trimming, re-estimate the variance-covariance  
523 matrix using the robust estimator  $\hat{B}_T$  with bias correction, followed by re-estimating  $\hat{\beta}$  and  $\hat{\gamma}_i$   
524 using  $\hat{B}_T$ . vi. FastMix performs hypothesis test and constructs quasi- $p$ -values that indicate the  
525 significance of cell type-specific DEGs. **(c)** Using trimming improves the estimation of the  
526 covariance matrix. Axes are random effect signals of two cell populations (Cell1 and Cell2); dots  
527 (grey and black) are simulated data of 5000 genes, among which, 250 genes are true DEGs in  
528 the Cell1 direction (black dots). Three ellipses are the density contour curves that represent the  
529 95% confidence region of the centered data distribution with covariance matrices of:  $B$  that is  
530 the true covariance matrix shown in black,  $\hat{B}^{(0)}$  that is the initial non-robust covariance

531 estimator shown in red, and  $\hat{B}_T$  that is the robust covariance estimator based on trimming  
532 shown in green. Due to the existence of the true DEGs (outliers),  $\hat{B}^{(0)}$  overestimated the true  
533 covariance matrix. The trimming-based estimator  $\hat{B}_T$  is very close to the true covariance matrix.

534 **(d)** Sample analytical pipeline for cell type-specific differential analysis between disease and  
535 control groups by integrating flow cytometry data and bulk RNA-seq data using two newly  
536 developed computational algorithms DAFi and FastMix.

537

538 **Table 1. Simulation performance. (a)** Comparison of FastMix implementations (FastMix  
539 with independence assumption, i.e., FastMix\_ind, and default FastMix with no  
540 assumption on the covariance matrix) and lme4 implementations (lme4 with independence  
541 assumption, i.e. lme4\_ind, and default lme4 with no assumption on the covariance matrix) for  
542 estimating  $B$ , the covariance matrix of random effects, in linear mixed effects regression  
543 (LMER). Four simulation scenarios are considered: with or without true DEGs, and with or  
544 without correlation between random effects. Mean computational time and mean MSE are  
545 reported. Computational time is reported in seconds, and estimation accuracy is reported in  
546 mean squared error (MES). MSE is defined as  $\sum_{i=1}^p \sum_{j=1}^p 1/p^2 (\hat{B}_{ij} - B_{ij})^2$ . Simulations are  
547 repeated 200 times. **(b)** Comparison of FastMix with ordinary least squares (OLS) and Ridge  
548 regression for regression coefficient,  $\beta_{ij}$ , estimation. The first row is the mean MSE (standard  
549 deviation in brackets) defined as  $1/(mp) \sum_{i=1}^m \sum_{j=1}^p (\hat{\beta}_{ij} - \beta_{ij})^2$ . The other rows are the mean  
550 bias (standard deviation in brackets) of each fix effect coefficient estimation. Simulations are  
551 repeated 200 times. All results are reported after multiplying by 100 for better readability. **(c-e)**

552 Mean (standard deviation in brackets) of type-I error rate (c), statistical power (d), and  
553 computational time reported in seconds (e) of csSAM and FastMix for cell type-specific DEG  
554 detection, in the same simulation scheme repeated 200 times. The simulation design includes  
555 independent random effects (i.e., cor = 0) and correlated random effects (i.e., cor = 0.5). True  
556 cell type-specific DEGs are only assigned in cell1 and cell2 in the simulations. Type-I error rate  
557 and statistical power are reported in percentage (%).

558 **Figure 2. FastMix and scRNA-seq results for HVP01 study.** (a) DAFi gating strategy to identify  
559 singlets, leukocytes, live leukocytes, CD66- CD45+ population (parent: live leukocytes), and  
560 CD66+ CD45- population (parent: live leukocytes). (b) UMAP visualization of scRNA-seq cell type  
561 clusters. Cells are colored by cluster labels derived by flow cytometry panels. (c) Overlapping of  
562 the 851 (out of 13157 total genes) FastMix neutrophil-specific signature genes and the 2744  
563 scRNA-seq neutrophil signature genes available in the bulk RNA-seq data. (d) Venn diagram of  
564 the overlapping between the top 100 FastMix neutrophil signature genes and the scRNA-seq  
565 neutrophil signature genes with  $|\logFC| > 1$ . The 39 common genes are shown in the text box.

566 **Figure 3. Expression of neutrophil-specific signature genes in the scRNA-seq experiment.** (a)  
567 The 39 common signature genes identified by FastMix and scRNA-seq analysis (same in  
568 Figure 2c). (b) The bottom 39 genes ranked by FastMix. (c) The top 39 genes ranked by  
569 FastMix.

570 **Figure 4. Pathway enrichment analysis for HVP01 study.** (a) Enriched pathways identified by  
571 the top 100 FastMix neutrophil-specific DEGs for high responders. (b) Unique genes from the

572 CD45pCD66p.Response (i.e., neutrophil and high response) interaction DEG list that are  
573 identified in the enriched pathways in (d).

574 **Figure 5. FastMix analysis for SDY180. (a)** DAFi gating strategy to identify lymphocytes,  
575 granulocytes, and monocytes, CD45+ CD14- (parent: granulocytes and monocytes), CD45+  
576 CD14+ (parent: granulocytes and monocytes), granulocytes (parent: CD45+ CD14-), and  
577 monocytes (parent: CD45+ CD14+). **(b)** Boxplots of cell proportions (lymphocytes, granulocytes,  
578 monocytes) over time in the Influenza vaccine study. **(c)** Boxplots of bulk expression levels of  
579 interferon-stimulated genes (e.g., *CXCL10*, *IFIT1*, *LAMP3*) over time in the Influenza vaccine  
580 study. Red box: matching temporal pattern change of lymphocytes proportion and bulk gene  
581 expression. **(d)** Heatmap of  $-\log_{10}$ -transformed  $p$ -values for lymphocyte-specific differential  
582 expression for the interferon module genes in both Influenza and Pneumococcal study arms. **(e)**  
583 Heatmap of  $-\log_{10}$ -transformed  $p$ -values for lymphocyte-specific differential expression w.r.t.  
584 age for the interferon module genes in both Influenza and Pneumococcal study arms.

## 585 **Methods**

### 586 ***Cell type-specific inference based on bulk tissue modeling***

587 In the regression model framework, composite tissue data can be modeled as

$$Y_{ji} = \sum_{k=1}^K \mathbf{Cell}_{jk} \cdot b_{kij} + \epsilon_{ij}, \quad i = 1, \dots, m, \quad j = 1, \dots, n. \#(1)$$

588 Specifically,  $Y_{ji}$  is the observed bulk expression of the  $i$ th gene and  $j$ th sample;  $\mathbf{Cell}_{jk}$  is the  
589 observed proportion of the  $k$ th cell type (or cell population) in the  $j$ th sample, and  $b_{kij}$  is the  
590 cell type-specific expression level of the  $i$ th gene and  $j$ th sample contributed solely by the  $k$ th  
591 cell type, and  $\epsilon_{ij}$  is the uncertainty in measuring  $\mathbf{Cell}_{jk}$  and  $Y_{ji}$ . Many downstream analyses are  
592 focused to associate  $b_{kij}$  (cell type-specific gene expression) instead of  $Y_{ji}$  (bulk gene  
593 expression) to the clinical metadata, which can be modeled as

$$b_{kij} = \beta_{ki} + \sum_{p=1}^P \mathbf{Clin}_{jp} \cdot a_{ipk} + e_{kij}. \#(2)$$

594 Here  $\beta_{ki}$  is the baseline expression level of the  $i$ th gene in the  $k$ th cell type,  $\mathbf{Clin}_{jp}$  is the  $p$ th  
595 clinical covariate associated with the  $j$ th sample,  $a_{ipk}$  quantifies the linear association between  
596 the  $p$ th clinical covariate and the  $i$ th gene specific to the  $k$ th cell type. In this context, cell type-  
597 specific differential analysis can be conducted by testing the following hypotheses

$$H_{0,ipk}: a_{ipk} = 0, \text{ v.s. } H_{1,ipk}: a_{ipk} \neq 0. \#(3)$$

598 For the  $k$ th cell type, the  $i$ th gene is a cell type-specific DEG with respect to the  $p$ th clinical  
599 covariate if the  $p$ -value from the Equation (3) hypothesis test is statistically significant.

600 Based on the above framework, one straightforward approach to perform cell type-specific  
601 analysis would consist of two stages: (i) apply *in silico* algorithm, such as deconvolution, to  
602 estimate  $\hat{b}_{kij}$ ; and (ii) apply a suitable DE analysis to associate  $\hat{b}_{kij}$  with the clinical data.

603 However, there is a major challenge of this approach, i.e., Equation (1) is a typical “large  $p$ ,  
604 small  $n$ ” problem because there are approximately  $Knm$  unknown parameters ( $b_{kij}$ ) to be  
605 estimated from only  $nm$  observations ( $Y_{ji}$ ). While many computational methods such as  
606 nonnegative matrix factorization [56-59], regularization [60], and Bayesian methods [61-64],  
607 are used to obtain approximate solutions an under-determined system for deconvolution [65],  
608 the bias and variance of the estimated  $\hat{b}_{kij}$  are inevitably large, which will consequently impact  
609 the accuracy of the downstream DE analysis.

610 FastMix *model*

611 We propose to jointly model the two-stage analysis in one unified regression model by  
612 combining Equation (1) and Equation (2)

$$\begin{aligned} Y_{ji} &= \sum_{k=1}^K \mathbf{Cell}_{jk} \cdot \left( \beta_{ki} + \sum_{p=1}^P \mathbf{Clin}_{jp} \cdot a_{ipk} + e_{kij} \right) + \epsilon_{ij} \\ &= \sum_{k=1}^K \mathbf{Cell}_{jk} \beta_{ki} + \sum_{k=1}^K \sum_{p=1}^P \mathbf{Cell}_{jk} \mathbf{Clin}_{jp} \cdot a_{ipk} + \tilde{\epsilon}_{ij} . \end{aligned} \quad \#(4)$$

613 Here  $\tilde{\epsilon}_{ij}$  is the combined error term,  $\tilde{\epsilon}_{ij} = \epsilon_{ij} + \sum_{k=1}^K \mathbf{Cell}_{jk} e_{kij}$ ,  $a_{ipk}$  that quantifies the  
614 interaction between the  $k$ th cell type and the  $p$ th clinical covariate. To model the direct  
615 association between the bulk gene expression and clinical covariates, we further add a main  
616 term  $\mathbf{Clin}_{jp}$  to Equation (4), which is commonly used in the traditional bulk DE analysis.  
617 Therefore, the unified model includes main terms  $\mathbf{Cell}_{jk}$  and  $\mathbf{Clin}_{jp}$ , and their interaction term  
618  $\mathbf{Cell}_{jk} \mathbf{Clin}_{jp}$ , which can be stated in the standard multivariate linear regression model  
619  $Y = XW + E$ , or explicitly

$$Y_{ji} = \sum_{l=1}^L X_{jl} \beta_{li} + \epsilon_{ij}. \#(5)$$

620 Here  $X_{jl}$  is an element in matrix  $X := (\mathbf{Cell} \quad \mathbf{Clin} \quad \mathbf{Cell} \times \mathbf{Clin})$ , which has  $n$  rows and  
621  $L = K + P + KP$  columns. We call each column of matrix  $X$  a linear predictor, and  $\beta_{li}$ 's the  
622 linear coefficients. Model (5) is a combination of both bulk and cell type-specific DE analyses.  
623 This unified modeling approach allows us to bypass the error-prone and computationally  
624 intensive parameter estimation stage (Equation (1)), and only focus on the more biological  
625 interpretable DE stage for the associations between the three types of variables (cell types,  
626 clinical covariates, and their interactions) with the bulk/cell type-level gene expression.  
627 One important advantage of the unified model approach is that with reasonably large sample  
628 size ( $n > L$ ), Model (5) no longer has the "large  $p$ , small  $n$ " problem because there are only  $mL$   
629 unknown parameters ( $\beta_{li}$ ) to be estimated with  $nm$  observations ( $Y_{ji}$ ). FastMix does not  
630 explicitly estimate the deconvoluted cell type-specific expression values; rather, it uses joint  
631 modeling and techniques to be introduced in the following sections to implement a fast-



632 algorithmic solution for the large-scale unified model (Equation (5)) for bulk and cell type-  
633 specific DE analyses.

634 Common strategies to solve a large-scale model such as Equation (5) is to apply regularizations,  
635 a.k.a. penalized regressions such as ridge [13], LASSO [14], and elastic-net [15], to increase the  
636 stability and prediction accuracy of the original regression model. However, these techniques  
637 have two drawbacks: (i) they shrink the estimated linear coefficients toward zero and create  
638 nontrivial bias; and (ii) the best penalty parameter(s) are typically trained by time-consuming  
639 cross-validation (CV) procedures, which may not always be computationally feasible for high-  
640 throughput data analysis. As an alternative, we propose to use linear mixed effects regression  
641 (LMER) to reduce model complexity. Specifically, we assume a two-component decomposition  
642 of the unknown linear coefficient such that

$$\beta_{li} = \beta_l + \gamma_{li}, \#(6)$$

643 where  $\beta_l$  is the *fixed effect* of the  $l$ th linear predictor to the entire transcriptome, and  $\gamma_{li}$  is the  
644 gene-specific *random effect* associated with the  $l$ th linear predictor. By combining Equations (5)  
645 and (6), the FastMix model with mixed effects is

$$Y_{ji} = \sum_{l=1}^L X_{jl} (\beta_l + \gamma_{li}) + \epsilon_{ij}. \#(7)$$

646 Using the LMER model fitting approach does not need to train hyperparameters with intensive  
647 CV procedures. Also, the LMER model can shrink the estimated gene-specific linear coefficients

648 toward the fixed effects (i.e. average of the entire transcriptome) instead of zero [20], thereby  
649 achieving comparable variance-reduction effects with less bias.

650 The next step is to model DEGs and non-DEGs (NDEGs) based on Equation (7). In most practical  
651 cases, the majority of the genes are NDEGs; and only a small fraction of the genes are truly  
652 DEGs that may be used as biomarkers for specific biological conditions. In this regard, we  
653 propose to approach the DEG identification problem as an outlier detection problem in more  
654 general setting. Specifically, we propose to model the gene-specific random effects,  $\gamma_{li}$ 's, using  
655 a mixture distribution and adapt a nonparametric empirical Bayes method [24, 25] to conduct  
656 per-gene statistical inference.

657 Let  $\iota$  be a binary indicator for DEG ( $\iota = 1$ ) and NDEG ( $\iota = 0$ ). The prior probability of a gene  
658 being NDEG or DEG is  $P(\iota = 0) = \pi_0$  or  $P(\iota = 1) = 1 - \pi_0$ , respectively. The mixture  
659 distribution of the multivariate vector  $\boldsymbol{\gamma}_i = (\gamma_{li}, l = 1, \dots, L)'$  is

$$\boldsymbol{\gamma}_i \sim f(\mathbf{x}), \quad f(\mathbf{x}) = \pi_0 f_0(\mathbf{x}) + (1 - \pi_0) f_1(\mathbf{x}), \#(8)$$

660 where  $\mathbf{x}$  is a dummy variable,  $f_0(\cdot)$  is the component distribution for NDEGs and  $f_1(\cdot)$  is the  
661 component distribution for DEGs. Furthermore, it is reasonable to assume that: (i)  $\pi_0 \gg 1 - \pi_0$ ,  
662 i.e. most of the genes are NDEGs; (ii) the conditional distribution of the multivariate vector  $\boldsymbol{\gamma}_i$   
663 given  $\iota = 0$  is a  $L$ -dimensional normal random vector centered at the origin with covariance  
664 matrix  $B$ ; and (iii) let  $D_\alpha \subset \mathbb{R}^L$  be the confidence region of  $f_0(\cdot)$  centered at the origin with  
665 probability  $1 - \alpha$  with a relatively large  $\alpha$ , then

$$P(\boldsymbol{\gamma}_i \in D_\alpha | \iota = 1) \ll P(\boldsymbol{\gamma}_i \in D_\alpha | \iota = 0). \#(9)$$

666 Intuitively, Equation (9) implies that compared with NDEGs, the DEGs can be viewed as “outliers”  
667 (Figure 1c). No parametric assumptions are applied to  $f_1(\cdot)$ . From the above assumptions, the  
668 marginal distribution for the nonparametric empirical Bayes method is

$$f(\mathbf{x}|\iota) = \begin{cases} f_0(\mathbf{x}) := \phi(\mathbf{x}|\mathbf{0}, B), & \iota = 0 \\ f_1(\mathbf{x}), & \iota = 1 \end{cases} \#(10)$$

669 where  $\phi(\cdot|\mathbf{0}, B)$  is the density function of a multivariate normal random vector defined on  $\mathbb{R}^L$   
670 with zero mean and covariance matrix  $B$ .

671 In summary, Equations (7), (8) and (10) specify the full `FastMix` model of the unified pipeline  
672 for cell type-specific DE analysis:

673 
$$Y_{ji} = \sum_{l=1}^L X_{jl} (\beta_l + \gamma_{li}) + \epsilon_{ij}, \epsilon_{ij} \sim N(0, \sigma_\epsilon^2) \text{ for the LMER model;}$$

674 
$$\gamma_i \sim f(\mathbf{x}), f(\mathbf{x}) = \pi_0 f_0(\mathbf{x}) + (1 - \pi_0) f_1(\mathbf{x}) \text{ for mixture distribution; and}$$

675 
$$f(\mathbf{x}|\iota) = \begin{cases} f_0(\mathbf{x}) := \phi(\mathbf{x}|\mathbf{0}, B), & \iota = 0 \\ f_1(\mathbf{x}), & \iota = 1 \end{cases} \text{ for nonparametric empirical Bayes.}$$

### 676 **Computationally efficient `FastMix` algorithm**

677 The `FastMix` model has many theoretical advantages by using a LMER model; however, fitting  
678 such a large LMER model with high-throughput data is still computationally challenging. To  
679 reduce the high computational cost of fitting large LMER models by conventional methods,  
680 such as the iterative expectation-maximization (EM) algorithm [22], we design a highly efficient

681 algorithm with a novel robust moment-based covariance estimator, which avoids the iterations  
682 and convergence process, thus largely saves the computational time.

683 In the following subsections, high-level descriptions of the key steps are provided here. All  
684 technical details, including the derivations, proofs, and step-by-step procedures are provided in  
685 Supplementary Material.

### 686 **Vectorization and Kronecker product**

687 The FastMix LMER model can be concisely represented in vectorization form using Kronecker  
688 product [66]

$$\mathbf{Y} = \mathbf{X}\boldsymbol{\beta} + \mathbf{Z}\boldsymbol{\gamma} + \boldsymbol{\epsilon},$$
$$\mathbf{X} := \mathbf{1}_m \otimes X = \begin{pmatrix} X \\ \vdots \\ X \end{pmatrix}, \quad \boldsymbol{\gamma} := \begin{pmatrix} \boldsymbol{\gamma}_1 \\ \vdots \\ \boldsymbol{\gamma}_m \end{pmatrix}, \quad \mathbf{Z} := I_m \otimes X = \begin{pmatrix} X & & \\ & \ddots & \\ & & X \end{pmatrix}. \#(10)$$

689 Note that  $\mathbf{X}$  is  $N \times L$ -dimensional,  $\mathbf{Z}$  is  $N \times mL$ -dimensional, and  $\boldsymbol{\gamma}$  is  $mL \times 1$ -dimensional,  
690 where  $N = mn$  is the total number of observations. In this form,  $\mathbf{Y}$  is a long vector of length  $N$ ,  
691 by column-wise stacking of the bulk gene expression matrix;  $\boldsymbol{\beta}$  is the long vector of linear  
692 coefficients to be estimated of the same length; and  $\boldsymbol{\epsilon}$  is the corresponding error vector. Now, it  
693 is clear that all three types of high- and low-dimensional data are neatly combined in the form  
694 of a standard LMER. The vectorized notions (in bold face and non-italic) will be used in the  
695 subsequent estimation derivations; it also helps to speed up the implementation of the  
696 algorithm.

### 697 **Moment-based estimation**

698 An initial estimation of the linear coefficients  $\widehat{\beta}_i^{(0)} = (\hat{\beta}_{li}, l = 1, \dots, L)'$  can be obtained through  
699 fitting the multivariate linear regression in Equation (5) using the ordinary least squares (OLS)  
700 criterion.  $\widehat{\beta}_i^{(0)}$  can be considered as a crude approximation of  $\gamma_i$ , which contains information  
701 about the covariance matrix of  $\gamma$ . Denote the sample covariance matrix of  $\widehat{\beta}_i^{(0)}$  as  $\widehat{\Sigma}_{\widehat{\beta}^{(0)}} \in M_{L \times L}$ .  
702 Even for NDEGs ( $\iota = 0$ ),  $\widehat{\Sigma}_{\widehat{\beta}^{(0)}}$  is not an unbiased estimator of  $B$ . Its conditional expectation can  
703 be derived as follows

$$E\left(\widehat{\Sigma}_{\widehat{\beta}^{(0)}} \mid \iota = 0\right) = B + \sigma_\epsilon^2 (X'X)^{-1}. \#(11)$$

704 Based on Equation (11), and the assumption that most genes are NDEGs ( $\iota = 0$ ), we propose  
705 the following moment-based estimator for an initial estimation of  $B$

$$\widehat{B}^{(0)} := \widehat{\Sigma}_{\widehat{\beta}^{(0)}} - \widehat{\sigma}_\epsilon^2 (X'X)^{-1}. \#(12)$$

706 Based on the initial OLS-based estimates, the standard closed-form solutions of solving LMER  
707 model are used to obtain the first set of fixed effects and random effects estimates for Equation  
708 (6), denoted in  $\widehat{\beta}^{(1)}$  and  $\widehat{\gamma}_i^{(1)}$ , respectively. The weighted least squares (WLS) estimator is used  
709 to compute  $\widehat{\beta}^{(1)}$ ; and the empirical best linear unbiased predictor (EBLUP) is used to compute  
710  $\widehat{\gamma}_i^{(1)}$ . Both estimates depend on  $\widehat{B}^{(0)}$ , the initial moment-base estimate of  $B$ .

711 **Trimming for potential DEGs**

712 One of the assumptions of the `FastMix` model is that there is a small subset of genes that are  
713 DEGs. The existence of these potential DEGs may affect the accuracy of the initial estimates of  
714  $B$ ,  $\beta$ , and  $\gamma_i$  in the previous step. We designed a three-step procedure to detect and remove  
715 those potential DEGs.

716 Briefly speaking, when the DEGs are present,  $\hat{\gamma}_i^{(1)}$  no longer follows a multivariate normal  
717 distribution. A DEG for one covariate may very likely be an NDEG for another covariate; also, it  
718 is possible that a subset of covariates is not associated with any DEG (we call them  
719 uninformative covariates). The three-step procedure includes: (i) use a standard normality test,  
720 the Shapiro-Wilk test, to separate the informative and uninformative covariates; (ii) select the  
721 subset of the standardized linear coefficient estimates pertain to the informative covariates and  
722 calculate the Mahalanobis distance between the sub-vector and the origin (its theoretical  
723 mean), i.e., this quantity quantifies how likely a gene is an outlier among all genes. Under the  
724 assumption that most genes are NDEGs, the distance metrics of all genes form approximately a  
725 chi-squared distribution; and (iii) use a pre-defined trim level (denoted as  $\alpha$ , which is a user-  
726 defined tuning parameter with default value  $\alpha = 0.5$ ) to select potential DEGs based on the  
727 distance metric following the chi-squared distribution.

728 After trimming of the potential DEGs that break the normality assumption, the remaining genes,  
729 denoted as  $S_0 \subseteq \{1, \dots, m\}$ , will be used to refine the estimation in previous steps.

730 **Re-estimation and bias correction**

731 Now, re-estimate  $B$  based on the trimmed gene list  $S_0$ . However, the trimming procedure  
732 inevitably introduces bias to the sample covariance matrix, because removing genes with large  
733 Mahalanobis distance artificially reduces the sample covariance matrix computed from the  
734 remaining genes. To correct for this bias, we consider a truncated chi-squared distribution and  
735 constructed a moment-based bias-correction for  $B$  as follows

$$\widehat{B}_T := \Lambda^{-1/2} \widetilde{\Lambda}^{1/2} \widehat{\Sigma}_{\widehat{\beta}^{(0)}} \widetilde{\Lambda}^{1/2} \Lambda^{-1/2} - \widehat{\sigma}_\epsilon^2 (X'X)^{-1}. \#(13)$$

736 For the fixed effect, we utilize the similar idea of trimming to de-bias the fix effect estimation if  
737 there are any potential unbalanced DEGs (see Supplementary Material Section 2.2 for more  
738 details). The final fixed effects estimate  $\widehat{\beta}$  and random effects estimate  $\widehat{\gamma}_i$  are re-computed  
739 using  $\widehat{B}_T$ . Figure 1c illustrates the advantage of the trimming and re-estimation procedures.

#### 740 **Hypothesis test and quasi-p-value**

741 Traditionally, DE analysis can be performed through hypothesis testing strategies on the linear  
742 coefficients (such as Equation (3)). There are mature regression F- and t-tests for the fixed  
743 effects in LMER models, but not for the random effects because they are considered as  
744 realizations of random variables (i.e. not unknown parameters) [67]. To overcome this  
745 theoretical challenge, we developed a practical  $p$ -value-like quantity (called “quasi- $p$ -value”)  
746 through analogy, to identify genes that have significantly larger or smaller predicted random  
747 effect with a given covariate. The quasi- $p$ -value is defined as

$$\widehat{p}_{li} := 1 - \Phi\left(\frac{|\widehat{\gamma}_{li}|}{\widehat{\sigma}_{\widehat{\gamma}_l}}\right), \#(14)$$

748 where  $\Phi(\cdot)$  is the standard normal distribution function. Note that  $\hat{p}_{li}$  is not a “true”  $p$ -value  
749 because  $\iota$  is a random variable, not a parameter, in the LMER model; so, we cannot test  
750 hypotheses  $H_0: \iota = 0$  (i.e., NDEG) versus  $H_1: \iota = 1$  (i.e., DEG) in the classical sense. In practice,  
751 the quasi- $p$ -value for the random effects can be used as a practical criterion to rank and select  
752 genes with strong association with the  $l$ th covariate, which are the central inference output  
753 from the `FastMix` model. The random effects results can be interpreted as the cell type  
754 marker, bulk-level, and cell type-specific DE analyses as introduced in the Results section.  
755 For the completeness of the model output, the hypotheses for the fixed effects are

$$H_{0,l}: \beta_l = 0, \text{ versus } H_{1,l}: \beta_l \neq 0. \#(15)$$

756 The test statistic is  $t_{\beta_l} = \frac{\hat{\beta}_l^{(1)}}{\hat{\sigma}_{\hat{\beta}_l^{(1)}}}$ , which follows a t-distribution with degrees of freedom  
757 approximated by the Satterthwaite’s method [68]. The fixed effects tests are not gene-specific;  
758 instead, these results can be interpreted as whether a clinical covariate has a statistically  
759 significant impact on the whole transcriptome.

## 760 **Weighted FastMix model**

761 So far, the `FastMix` model assumes independent and identically distributed (i.i.d.) samples.  
762 Sometimes, *a priori* knowledge may be available to weigh some samples over others; or in a  
763 longitudinal study, repeated measurements are not i.i.d. samples and they tend to have block  
764 interchangeable covariance structure. Such information can improve the estimation accuracy of  
765 regression-type models [69]; they can be easily incorporate in the weighted `FastMix` model



766 by constructing an appropriate weighted covariance matrix. We use techniques introduced in  
767 Zhang et al. [69] (`getSigma()` function from the `PBtest` R package) to estimate the  
768 weighted covariance matrix if unknown. In the simplest case, if weights are known, the  
769 weighted covariance matrix is a diagonal matrix with weights in the diagonal. For the weighted  
770 `FastMix` model, a data transformation step equivalent to the weighted least squares (WLS)  
771 approach is adopted with the given weighted covariance matrix before running the `FastMix`  
772 algorithm (see Supplementary Material).

### 773 ***Simulation details***

#### 774 **Simulation I**

775 Simulation I is one iteration of a comprehensive simulation scheme described in Simulation II  
776 with correlation  $\rho = 0.5$  and balanced DEG design. Cell1 and Cell2 dimensions are visualized in  
777 Figure 1c.

#### 778 **Simulation II**

779 The simulated bulk gene expression levels are associated with  $L = 11$  covariates: three cell  
780 proportions (Cell1, Cell2, and Cell3), two clinical covariates (Severity and Sex), and six  
781 interaction terms between cell proportions and clinical covariates. The simulation design is as  
782 follows.

783 1. Specifications of the fixed effects ( $\beta_l$ ) and the random effects ( $\gamma_{li}$ ) of NDEGs are:

- 784 1.1. Cell1 has an overall association with all gene expressions; Cell2 and Cell3 does not.  
785 Specifically,  $\beta_1 = 1.5$  and  $\beta_2 = \beta_3 = 0$ . For NDEGs ( $l = 0$ ), the random effects are  $\gamma_{1i}$ ,  
786  $\gamma_{2i}$ , and  $\gamma_{3i}$ , which have marginal distribution  $N(0, \sigma_u^2)$  with  $\sigma_u = 1$ .
- 787 1.2. Neither Severity nor Sex has overall association with the whole transcriptome  
788 ( $\beta_4 = \beta_5 = 0$ ). For NDEGs, the corresponding random effects  $\gamma_{4i}$  and  $\gamma_{5i}$ , have marginal  
789 distribution  $N(0, \sigma_e^2)$  with  $\sigma_e = 0.8$ .
- 790 1.3. Only the interaction term between Cell1 and Severity has an overall impact on the  
791 whole transcriptome ( $\beta_6 = 0.75$ ). For NDEGs, the Cell1-specific random effect with  
792 respect to Severity,  $\gamma_{6i}$ , has marginal distribution  $N(0, \sigma_\alpha^2)$  with  $\sigma_\alpha = 1.2$ .
- 793 1.4. All other interaction terms have no overall association with gene expression ( $\beta_l = 0$  for  
794  $l = 7, \dots, 11$ ).
- 795 2. 20% of all genes are true DEGs (i.e., 1000 true DEGs). Specifications of the random effects  
796 ( $\gamma_{li}$ ) of DEGs ( $l = 1$ ) are:
- 797 2.1. Genes 1-250 are associated with Cell1 (a.k.a. Cell1 signature genes), i.e.,  $\gamma_{1i} \sim$   
798  $N(b_{1i}, \sigma_u)$ . The true differential expression size is  $|b_{1i}| = 3 \times \sigma_u$ ; the signs of  $b_{1i}$  follow  
799 a Bernoulli random variable with equal probability of being positive or negative (i.e., a  
800 balanced DEG design).
- 801 2.2. Genes 251 - 500 are DEGs with respect to Severity, i.e.,  $\gamma_{4i} \sim N(b_{4i}, \sigma_e)$ . The true  
802 differential expression size is  $|b_{4i}| = 3 \times \sigma_e$  with balanced DEG design.

803 2.3. Genes 501 - 750 are DEGs for the interaction term between Cell2 and Severity (a.k.a.  
804 Cell2-specific DEGs with respect to Severity), i.e.,  $\gamma_{7i} \sim N(b_{7i}, \sigma_\alpha)$ . The true differential  
805 expression sizes are  $|b_{7i}| = 3 \times \sigma_\alpha$  with balanced DEG design.

806 2.4. Genes 751 - 1000 are DEGs for the interaction term between Cell2 and Sex (a.k.a. Cell2-  
807 specific DEGs with respect to Sex), i.e.,  $\gamma_{10i} \sim N(b_{10i}, \sigma_\alpha)$ . The true differential  
808 expression sizes are  $|b_{10i}| = 3 \times \sigma_\alpha$  with balanced DEG design.

809 3. Consider two correlation structures of the random effects (i.e., true  $B$  matrix): either all  
810 random effects are independent (i.e., the identity matrix), or all random effects share an  
811 interchangeable correlation structure with  $\rho = 0.5$ .

812 4. The noise term is independent and identically distributed (i.i.d.) and follows  $N(0, \sigma_\epsilon^2)$  with  
813  $\sigma_\epsilon^2 = 0.25^2$ .

### 814 **Simulation III**

815 Because csSAM is limited to one binary clinical covariate design, simulated data are generated  
816 as follows. The simulated bulk gene expression levels are associated with  $L = 7$  covariates:  
817 three cell proportions (Cell1, Cell2, and Cell3), one clinical covariates (Group), and three  
818 interaction terms between cell proportions and the clinical covariate.

819 1. Specifications of the fixed effects ( $\beta_l$ ) and the random effects ( $\gamma_{li}$ ) of NDEGs are:

- 820 1.1. Cell1 has an overall association with all gene expressions; Cell2 and Cell3 does not.
- 821 Specifically,  $\beta_1 = 1.5$  and  $\beta_2 = \beta_3 = 0$ . For NDEGs ( $t = 0$ ), the random effects are  $\gamma_{1i}$ ,
- 822  $\gamma_{2i}$ , and  $\gamma_{3i}$ , which have marginal distribution  $N(0, \sigma_u^2)$  with  $\sigma_u = 1$ .
- 823 1.2. Group is a binary variable without fix effect ( $\beta_4 = 0$ ). For NDEGs, the random effects  $\gamma_{4i}$
- 824 has marginal distribution  $N(0, \sigma_e^2)$  with  $\sigma_e = 0.8$ .
- 825 1.3. The interaction terms between Cell1/Cell2/Cell3 and Group have fixed effects on the
- 826 whole transcriptome for  $\beta_5 = 0.5$ ,  $\beta_6 = 0.75$ , and  $\beta_7 = 0$ , respectively. For NDEGs, the
- 827 random effects  $\gamma_{5i}$ ,  $\gamma_{6i}$ , and  $\gamma_{7i}$  have marginal distribution  $N(0, \sigma_\alpha^2)$  with  $\sigma_\alpha = 1.2$ .
- 828 2. There are 500 true DEGs. Specifications of the random effects ( $\gamma_{li}$ ) of DEGs ( $t = 1$ ) are:
- 829 2.1. Genes 1-250 are DEGs for the interaction term Cell1 and Group (a.k.a. Cell1-specific
- 830 DEGs with respect to Group), i.e.,  $\gamma_{5i} \sim N(b_{5i}, \sigma_\alpha)$ . The true differential expression size
- 831 is  $|b_{5i}| = 3 \times \sigma_\alpha$  with balanced DEG design.
- 832 2.2. Genes 251 - 500 are DEGs for the interaction term Cell2 and Group (a.k.a. Cell2-specific
- 833 DEGs with respect to Group), i.e.,  $\gamma_{6i} \sim N(b_{6i}, \sigma_\alpha)$ . The true differential expression size
- 834 is  $|b_{6i}| = 3 \times \sigma_\alpha$  with balanced DEG design.
- 835 3. Consider two correlation structures of the random effects (i.e., true  $B$  matrix): either all
- 836 random effects are independent (i.e., the identity matrix), or all random effects share an
- 837 interchangeable correlation structure with  $\rho = 0.5$ .
- 838 4. The noise term is independent and identically distributed (i.i.d.) and follows  $N(0, \sigma_\epsilon^2)$  with
- 839  $\sigma_\epsilon^2 = 0.25^2$ .

840 ***Flow cytometry data and automated gating by DAFi***

841 The FCM dataset in the HVP01 Study (<https://clinicaltrials.gov/ct2/show/NCT03083158>) are  
842 provided by Kollmann lab, which has 75 FCS files (15 subjects across 5 visits – Day 0, 1, 3, 7 and  
843 14). The markers included in the reagent panel can be found in Supplementary Table S9. DAFi  
844 [23] (<https://github.com/JCVenterInstitute/DAFi-gating>) was applied to identify the neutrophil  
845 cell population following a predefined gating sequence (Figure 2a): Singlets (FSC-A vs FSC-H) ->  
846 Leukocytes (FSC-A vs SSC-A) -> Live Leukocytes (Viability vs SSC-A) -> Neutrophils (CD66 vs  
847 CD45). Proportions of neutrophils and their 2D dot plots for all 75 FCS files can be found in  
848 Supplementary File and Supplementary Figures S5-6 (in two batches May and August). A single  
849 set of DAFi-gating boundaries was used to identify the natural shapes of neutrophils in each  
850 batch to avoid using abrupt cutoffs in the manual gating analysis and to provide straightforward  
851 cross-sample comparison.

852 The second study we analyzed is the SDY180 on ImmPort  
853 (<https://www.import.org/shared/study/SDY180>), which is focused on immune responses to  
854 influenza and pneumococcal vaccines [48]. Among all the reagent panels used in SDY180, two  
855 of them contain CD45 and CD14 for us to define the granulocytes and monocytes  
856 (Supplementary Table S9). The 302 corresponding FCS files of the two panels are from 36  
857 subjects across 8 visits. DAFi was applied to identify three major types of cells from the FCM  
858 data (Figure 5a): Lymphocytes (FSC-A vs SSC-A), Granulocytes (CD45 vs CD14 followed by back-  
859 gating on FSC-A vs SSC-A), and Monocytes (CD45 vs CD14 followed by back-gating on FSC-A vs  
860 SSC-A).

861 **Data Availability**

862 The HVP01 dataset (<https://clinicaltrials.gov/ct2/show/NCT03083158>) is a clinical study  
863 conducted by University of British Columbia focused on Hepatitis B vaccine Engerix-B. This  
864 study has 16 healthy subjects from two cohorts: young adults (aged 40-60) and old adults (aged  
865 61-80). Both RNA-seq gene expressions and flow cytometry data are available across multiple  
866 visits before and after the vaccination from the same whole blood samples. Primary outcome of  
867 this study is the antibody response to the first dose of Hepatitis B vaccine.

868 The SDY180 dataset is downloaded from the ImmPort Shared Data portal  
869 (<http://www.immport.org>). This study has 18 young and healthy adult volunteers (aged 18-64)  
870 randomly assigned to three study groups (n = 6 subjects/group) receiving a single intramuscular  
871 dose of 2009–2010 seasonal influenza (Fluzone, Sanofi Pasteur, PA), pneumococcal vaccine  
872 (Pneumovax23, Merck, NJ), or placebo (saline). Blood samples were collected at multiple time  
873 visits, from 7 days before vaccination to 28 days after vaccination, for microarray, whole-blood  
874 flow cytometry, and serum analysis of neutralizing antibodies.

875 Data preprocessing details are in Supplementary Material.

876 **Acknowledgements**

877 This work is partially funded by NIH/NIAID UH2AI132342, the Human Vaccines Project, the  
878 Respiratory Pathogens Research Center (NIAID contract number HHSN272201200005C) and the  
879 University of Rochester CTSA award number UL1 TR002001 from the National Center for  
880 Advancing Translational Sciences of the National Institutes of Health. The content is solely the

881 responsibility of the authors and does not necessarily represent the official views of the  
882 National Institutes of Health.

### 883 **Author Contributions**

884 XQ and YQ conceived the project. HS and XQ designed and implemented the FastMix model,  
885 including simulations. TRK and RHS provided HVP data and guidance on method applications.  
886 AM processed the flow cytometry data. BDA processed the scRNA-seq data. YZ led the data  
887 analytical experiments and assessed the model performance. YZ and HS drafted the manuscript.  
888 YQ and XQ revised the manuscript. All authors read and agreed on the manuscript.

## 889    **References**

- 890    1.    Pinu, F.R., et al., *Systems biology and multi-omics integration: viewpoints from the*  
891        *metabolomics research community*. *Metabolites*, 2019. **9**(4): p. 76.
- 892    2.    Aevermann, B.D., et al., *Machine learning-based single cell and integrative analysis*  
893        *reveals that baseline mDC predisposition predicts protective Hepatitis B vaccine response*.  
894        medRxiv, 2021.
- 895    3.    Li, Y., et al., *Advances in bulk and single-cell multi-omics approaches for systems biology*  
896        *and precision medicine*. *Briefings in Bioinformatics*, 2021.
- 897    4.    Consortium, H.-I., *Multicohort analysis reveals baseline transcriptional predictors of*  
898        *influenza vaccination responses*. *Science immunology*, 2017. **2**(14).
- 899    5.    Tomic, A., et al., *SIMON, an automated machine learning system, reveals immune*  
900        *signatures of influenza vaccine responses*. *The Journal of Immunology*, 2019. **203**(3): p.  
901        749-759.
- 902    6.    Noecker, C., et al., *Metabolic model-based integration of microbiome taxonomic and*  
903        *metabolomic profiles elucidates mechanistic links between ecological and metabolic*  
904        *variation*. *MSystems*, 2016. **1**(1): p. e00013-15.
- 905    7.    McCall, M.N., et al., *A systems genomics approach uncovers molecular associates of RSV*  
906        *severity*. bioRxiv, 2020.
- 907    8.    Abdi, H. and L.J. Williams, *Principal component analysis*. *Wiley interdisciplinary reviews:*  
908        *computational statistics*, 2010. **2**(4): p. 433-459.
- 909    9.    Hardoon, D.R., S. Szedmak, and J. Shawe-Taylor, *Canonical correlation analysis: An*  
910        *overview with application to learning methods*. *Neural computation*, 2004. **16**(12): p.  
911        2639-2664.
- 912    10.    Abdi, H., *Partial least square regression (PLS regression)*. *Encyclopedia for research*  
913        *methods for the social sciences*, 2003. **6**(4): p. 792-795.
- 914    11.    Van der Maaten, L. and G. Hinton, *Visualizing data using t-SNE*. *Journal of machine*  
915        *learning research*, 2008. **9**(11).
- 916    12.    McInnes, L., J. Healy, and J. Melville, *Umap: Uniform manifold approximation and*  
917        *projection for dimension reduction*. arXiv preprint arXiv:1802.03426, 2018.
- 918    13.    Hoerl, A.E. and R.W. Kennard, *Ridge regression: Biased estimation for nonorthogonal*  
919        *problems*. *Technometrics*, 1970. **12**(1): p. 55-67.
- 920    14.    Tibshirani, R., *Regression shrinkage and selection via the lasso*. *Journal of the Royal*  
921        *Statistical Society: Series B (Methodological)*, 1996. **58**(1): p. 267-288.
- 922    15.    Zou, H. and T. Hastie, *Regularization and variable selection via the elastic net*. *Journal of*  
923        *the royal statistical society: series B (statistical methodology)*, 2005. **67**(2): p. 301-320.
- 924    16.    Singh, A., et al., *DIABLO: an integrative approach for identifying key molecular drivers*  
925        *from multi-omics assays*. *Bioinformatics*, 2019. **35**(17): p. 3055-3062.
- 926    17.    Peng, C., et al., *A latent unknown clustering integrating multi-omics data (LUCID) with*  
927        *phenotypic traits*. *Bioinformatics*, 2020. **36**(3): p. 842-850.
- 928    18.    Jin, S., L. Zhang, and Q. Nie, *scAI: an unsupervised approach for the integrative analysis*  
929        *of parallel single-cell transcriptomic and epigenomic profiles*. *Genome biology*, 2020.  
930        **21**(1): p. 1-19.



- 931 19. Cao, K., et al., *Unsupervised topological alignment for single-cell multi-omics integration*.  
932 Bioinformatics, 2020. **36**(Supplement\_1): p. i48-i56.
- 933 20. Maldonado, Y.M., *Mixed models, posterior means and penalized least-squares*. Lecture  
934 Notes-Monograph Series, 2009: p. 216-236.
- 935 21. Zhang, S., et al., *MatchMixeR: a cross-platform normalization method for gene*  
936 *expression data integration*. Bioinformatics, 2020. **36**(8): p. 2486-2491.
- 937 22. Bates, D., et al., *Fitting linear mixed-effects models using lme4*. arXiv preprint  
938 arXiv:1406.5823, 2014.
- 939 23. Lee, A.J., et al., *DAFi: A directed recursive data filtering and clustering approach for*  
940 *improving and interpreting data clustering identification of cell populations from*  
941 *polychromatic flow cytometry data*. Cytometry A, 2018. **93**(6): p. 597-610.
- 942 24. Efron, B., et al., *Empirical Bayes analysis of a microarray experiment*. Journal of the  
943 American statistical association, 2001. **96**(456): p. 1151-1160.
- 944 25. Qiu, X., L. Klebanov, and A. Yakovlev, *Correlation between gene expression levels and*  
945 *limitations of the empirical Bayes methodology for finding differentially expressed genes*.  
946 Statistical applications in genetics and molecular biology, 2005. **4**(1).
- 947 26. Khanam, A., et al., *Blockade of neutrophil's chemokine receptors CXCR1/2 abrogate liver*  
948 *damage in acute-on-chronic liver failure*. Frontiers in immunology, 2017. **8**: p. 464.
- 949 27. Le, P.-H., et al., *Clinical Predictors for Neutrophil-to-Lymphocyte Ratio Changes in*  
950 *Patients with Chronic Hepatitis B Receiving Peginterferon Treatment*. *in vivo*, 2017. **31**(4):  
951 p. 723-729.
- 952 28. Tang, B.M., et al., *Neutrophils-related host factors associated with severe disease and*  
953 *fatality in patients with influenza infection*. Nature communications, 2019. **10**(1): p. 1-13.
- 954 29. Cui, Z., et al., *Super-delta2: An Enhanced Differential Expression Analysis Procedure for*  
955 *Multi-Group Comparisons of RNA-seq Data*. Bioinformatics, 2021.
- 956 30. Liu, Y., J. Zhang, and X. Qiu, *Super-delta: a new differential gene expression analysis*  
957 *procedure with robust data normalization*. BMC Bioinformatics, 2017. **18**(1): p. 582.
- 958 31. Maronna, R.A. and V.J. Yohai, *The behavior of the Stahel-Donoho robust multivariate*  
959 *estimator*. Journal of the American Statistical Association, 1995. **90**(429): p. 330-341.
- 960 32. Maronna, R.A. and R.H. Zamar, *Robust estimates of location and dispersion for high-*  
961 *dimensional datasets*. Technometrics, 2002. **44**(4): p. 307-317.
- 962 33. Rousseeuw, P.J. and K.V. Driessen, *A fast algorithm for the minimum covariance*  
963 *determinant estimator*. Technometrics, 1999. **41**(3): p. 212-223.
- 964 34. Shen-Orr, S.S., et al., *Cell type-specific gene expression differences in complex tissues*.  
965 Nature methods, 2010. **7**(4): p. 287-289.
- 966 35. Tusher, V.G., R. Tibshirani, and G. Chu, *Significance analysis of microarrays applied to*  
967 *the ionizing radiation response*. Proceedings of the National Academy of Sciences, 2001.  
968 **98**(9): p. 5116-5121.
- 969 36. Wooden, S.L. and W.C. Koff, *The Human Vaccines Project: Towards a comprehensive*  
970 *understanding of the human immune response to immunization*. Human vaccines &  
971 immunotherapeutics, 2018. **14**(9): p. 2214-2216.
- 972 37. Shannon, C.P., et al., *Multi-omic data integration allows baseline immune signatures to*  
973 *predict hepatitis B vaccine response in a small cohort*. Frontiers in immunology, 2020. **11**.

- 974 38. Picelli, S., et al., *Full-length RNA-seq from single cells using Smart-seq2*. Nature protocols,  
975 2014. **9**(1): p. 171-181.
- 976 39. Keating, G.M. and S. Noble, *Recombinant hepatitis B vaccine (Engerix-B®)*. Drugs, 2003.  
977 **63**(10): p. 1021-1051.
- 978 40. Blondel, V.D., et al., *Fast unfolding of communities in large networks*. Journal of  
979 statistical mechanics: theory and experiment, 2008. **2008**(10): p. P10008.
- 980 41. Kiselev, V.Y., et al., *SC3: consensus clustering of single-cell RNA-seq data*. Nature  
981 methods, 2017. **14**(5): p. 483-486.
- 982 42. Xu, R., et al., *Low expression of CXCR1/2 on neutrophils predicts poor survival in patients  
983 with hepatitis B virus-related acute-on-chronic liver failure*. Scientific reports, 2016. **6**(1):  
984 p. 1-9.
- 985 43. Yu, G. and Q.-Y. He, *ReactomePA: an R/Bioconductor package for reactome pathway  
986 analysis and visualization*. Molecular BioSystems, 2016. **12**(2): p. 477-479.
- 987 44. Blasius, A.L., et al., *Bone marrow stromal cell antigen 2 is a specific marker of type I IFN-  
988 producing cells in the naive mouse, but a promiscuous cell surface antigen following IFN  
989 stimulation*. The Journal of Immunology, 2006. **177**(5): p. 3260-3265.
- 990 45. Sarojini, S., T. Theofanis, and C.S. Reiss, *Interferon-induced tetherin restricts vesicular  
991 stomatitis virus release in neurons*. DNA and cell biology, 2011. **30**(12): p. 965-974.
- 992 46. Miyagi, E., et al., *Vpu enhances HIV-1 virus release in the absence of Bst-2 cell surface  
993 down-modulation and intracellular depletion*. Proceedings of the National Academy of  
994 Sciences, 2009. **106**(8): p. 2868-2873.
- 995 47. Bhattacharya, S., et al., *ImmPort, toward repurposing of open access immunological  
996 assay data for translational and clinical research*. Scientific data, 2018. **5**: p. 180015.
- 997 48. Obermoser, G., et al., *Systems scale interactive exploration reveals quantitative and  
998 qualitative differences in response to influenza and pneumococcal vaccines*. Immunity,  
999 2013. **38**(4): p. 831-844.
- 1000 49. Gatti, D.M., et al., *Heading down the wrong pathway: on the influence of correlation  
1001 within gene sets*. BMC genomics, 2010. **11**(1): p. 1-10.
- 1002 50. Wu, D. and G.K. Smyth, *Camera: a competitive gene set test accounting for inter-gene  
1003 correlation*. Nucleic acids research, 2012. **40**(17): p. e133-e133.
- 1004 51. Zhang, Y., et al., *FUNNEL-GSEA: FUNctioNal ELastic-net regression in time-course gene  
1005 set enrichment analysis*. Bioinformatics, 2017. **33**(13): p. 1944-1952.
- 1006 52. Burel, J.G., et al., *An integrated workflow to assess technical and biological variability of  
1007 cell population frequencies in human peripheral blood by flow cytometry*. The Journal of  
1008 Immunology, 2017. **198**(4): p. 1748-1758.
- 1009 53. Kolaczkowska, E., et al., *Neutrophil elastase activity compensates for a genetic lack of  
1010 matrix metalloproteinase - 9 (MMP - 9) in leukocyte infiltration in a model of  
1011 experimental peritonitis*. Journal of leukocyte biology, 2009. **85**(3): p. 374-381.
- 1012 54. Hinson, E.R., et al., *Viperin is highly induced in neutrophils and macrophages during  
1013 acute and chronic lymphocytic choriomeningitis virus infection*. The Journal of  
1014 Immunology, 2010. **184**(10): p. 5723-5731.
- 1015 55. Pei, R., et al., *Interferon-induced proteins with tetratricopeptide repeats 1 and 2 are  
1016 cellular factors that limit hepatitis B virus replication*. Journal of innate immunity, 2014.  
1017 **6**(2): p. 182-191.

- 1018 56. Gaujoux, R. and C. Seoighe, *Semi-supervised Nonnegative Matrix Factorization for gene*  
1019 *expression deconvolution: a case study*. Infection, Genetics and Evolution, 2012. **12**(5): p.  
1020 913-921.
- 1021 57. Venet, D., et al., *Separation of samples into their constituents using gene expression*  
1022 *data*. Bioinformatics, 2001. **17**(suppl\_1): p. S279-S287.
- 1023 58. Lähdesmäki, H., et al., *In silico microdissection of microarray data from heterogeneous*  
1024 *cell populations*. BMC bioinformatics, 2005. **6**(1): p. 54.
- 1025 59. Repsilber, D., et al., *Biomarker discovery in heterogeneous tissue samples-taking the in-*  
1026 *silico deconvolution approach*. BMC bioinformatics, 2010. **11**(1): p. 1-15.
- 1027 60. Newman, A.M., et al., *Robust enumeration of cell subsets from tissue expression profiles*.  
1028 Nature methods, 2015. **12**(5): p. 453-457.
- 1029 61. Quon, G., et al., *Computational purification of individual tumor gene expression profiles*  
1030 *leads to significant improvements in prognostic prediction*. Genome medicine, 2013. **5**(3):  
1031 p. 29.
- 1032 62. Zhang, Y., et al., *The effect of tissue composition on gene co-expression*. Briefings in  
1033 Bioinformatics, 2019.
- 1034 63. Qiao, W., et al., *PERT: a method for expression deconvolution of human blood samples*  
1035 *from varied microenvironmental and developmental conditions*. PLoS Comput Biol, 2012.  
1036 **8**(12): p. e1002838.
- 1037 64. Quon, G. and Q. Morris, *ISOLATE: a computational strategy for identifying the primary*  
1038 *origin of cancers using high-throughput sequencing*. Bioinformatics, 2009. **25**(21): p.  
1039 2882-2889.
- 1040 65. Mohammadi, S., et al., *A critical survey of deconvolution methods for separating cell*  
1041 *types in complex tissues*. Proceedings of the IEEE, 2016. **105**(2): p. 340-366.
- 1042 66. Horn, R.A., R.A. Horn, and C.R. Johnson, *Topics in matrix analysis*. 1994: Cambridge  
1043 university press.
- 1044 67. Robinson, G.K., *That BLUP is a good thing: the estimation of random effects*. Statistical  
1045 science, 1991. **6**(1): p. 15-32.
- 1046 68. Satterthwaite, F.E., *An approximate distribution of estimates of variance components*.  
1047 Biometrics bulletin, 1946. **2**(6): p. 110-114.
- 1048 69. Zhang, Y., et al., *Highly efficient hypothesis testing methods for regression-type tests*  
1049 *with correlated observations and heterogeneous variance structure*. BMC Bioinformatics,  
1050 2019. **20**(1): p. 185.
- 1051

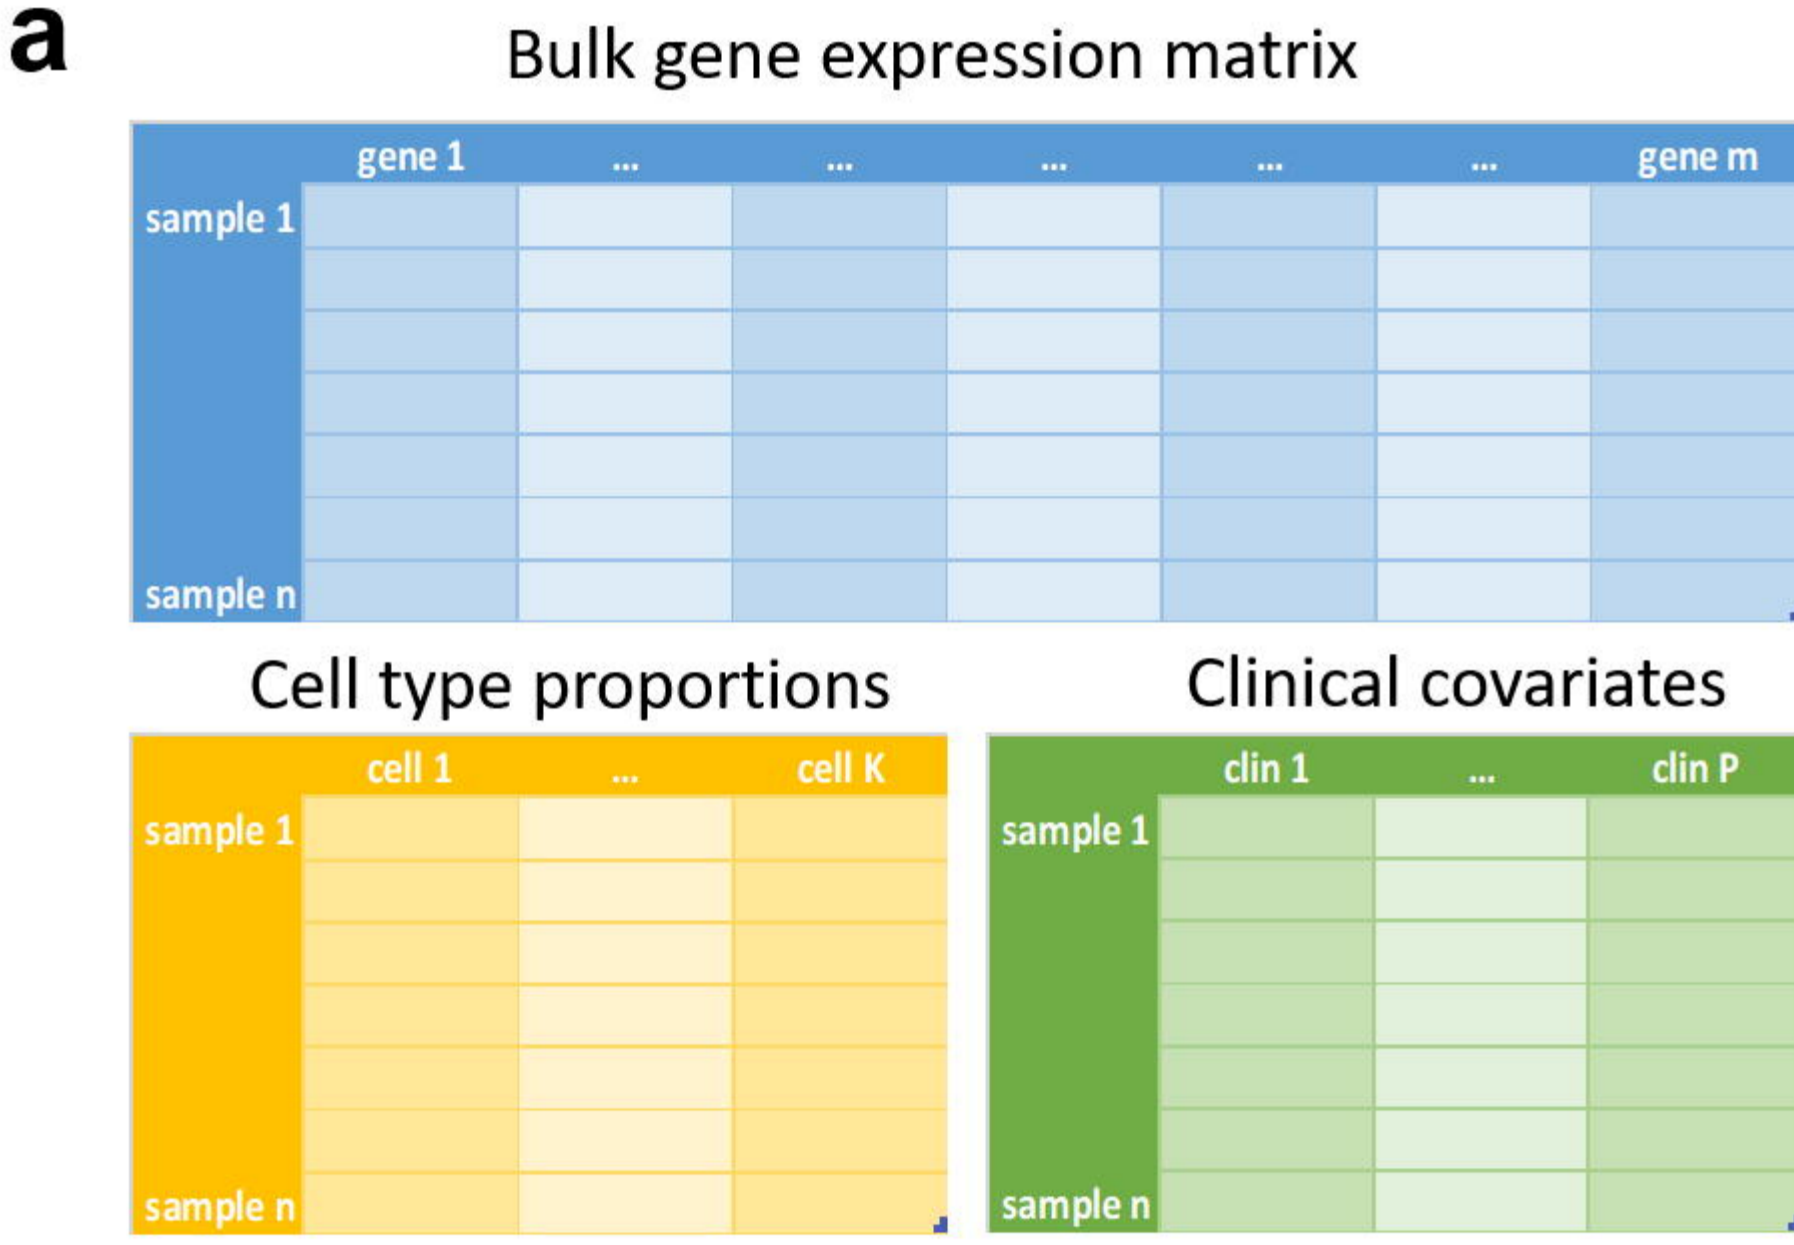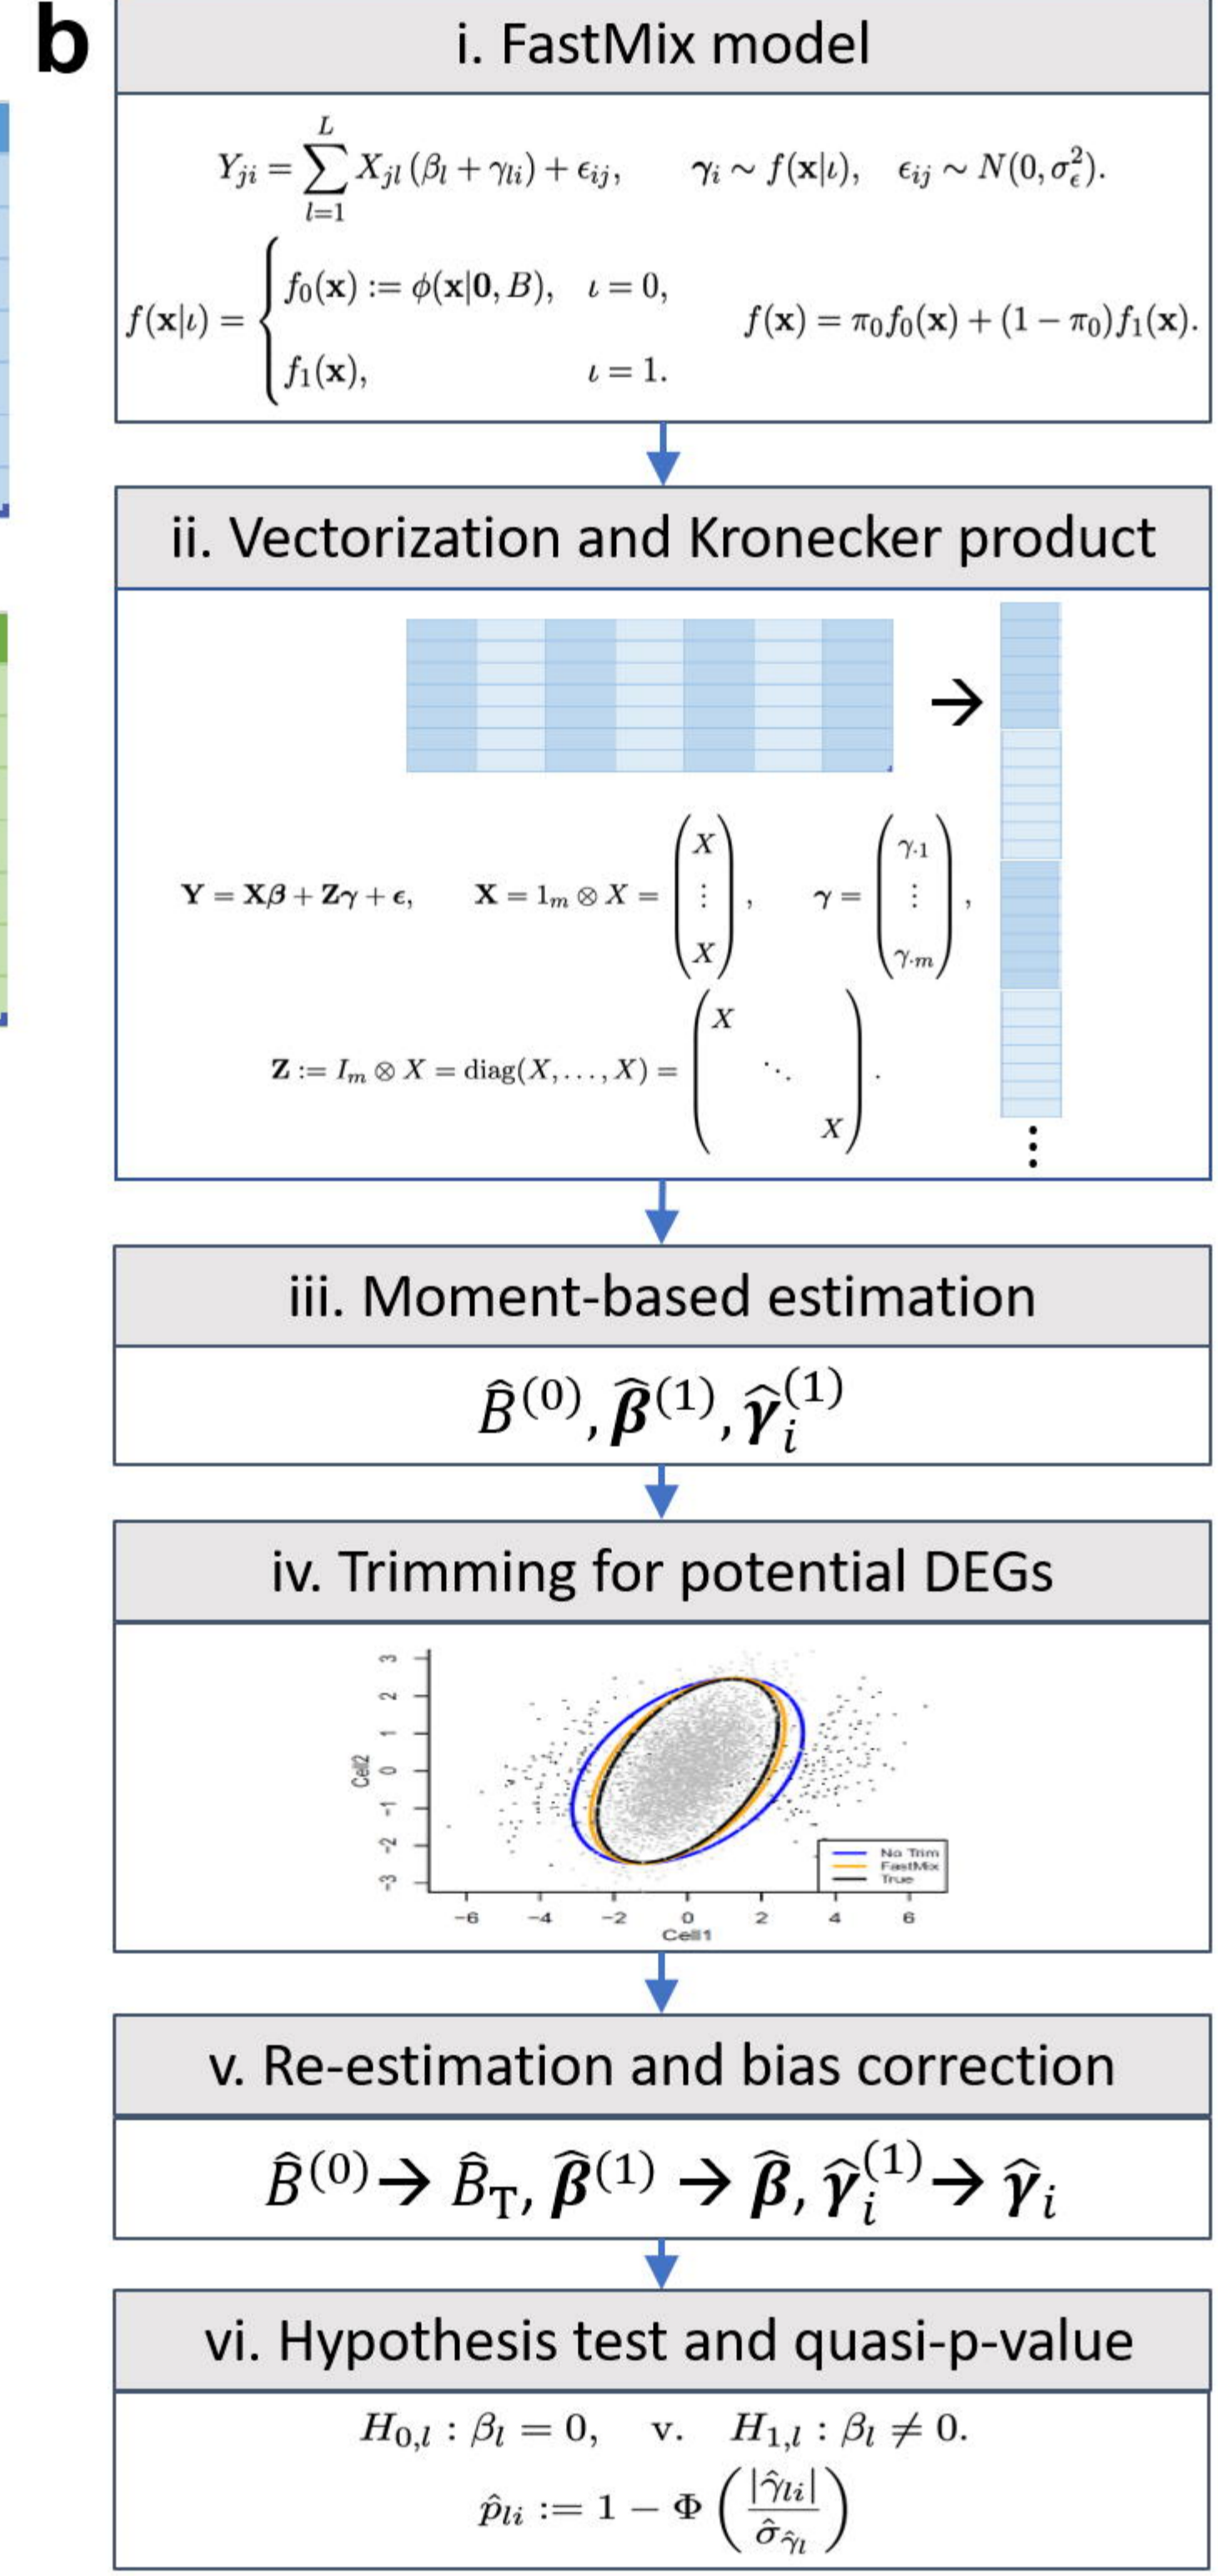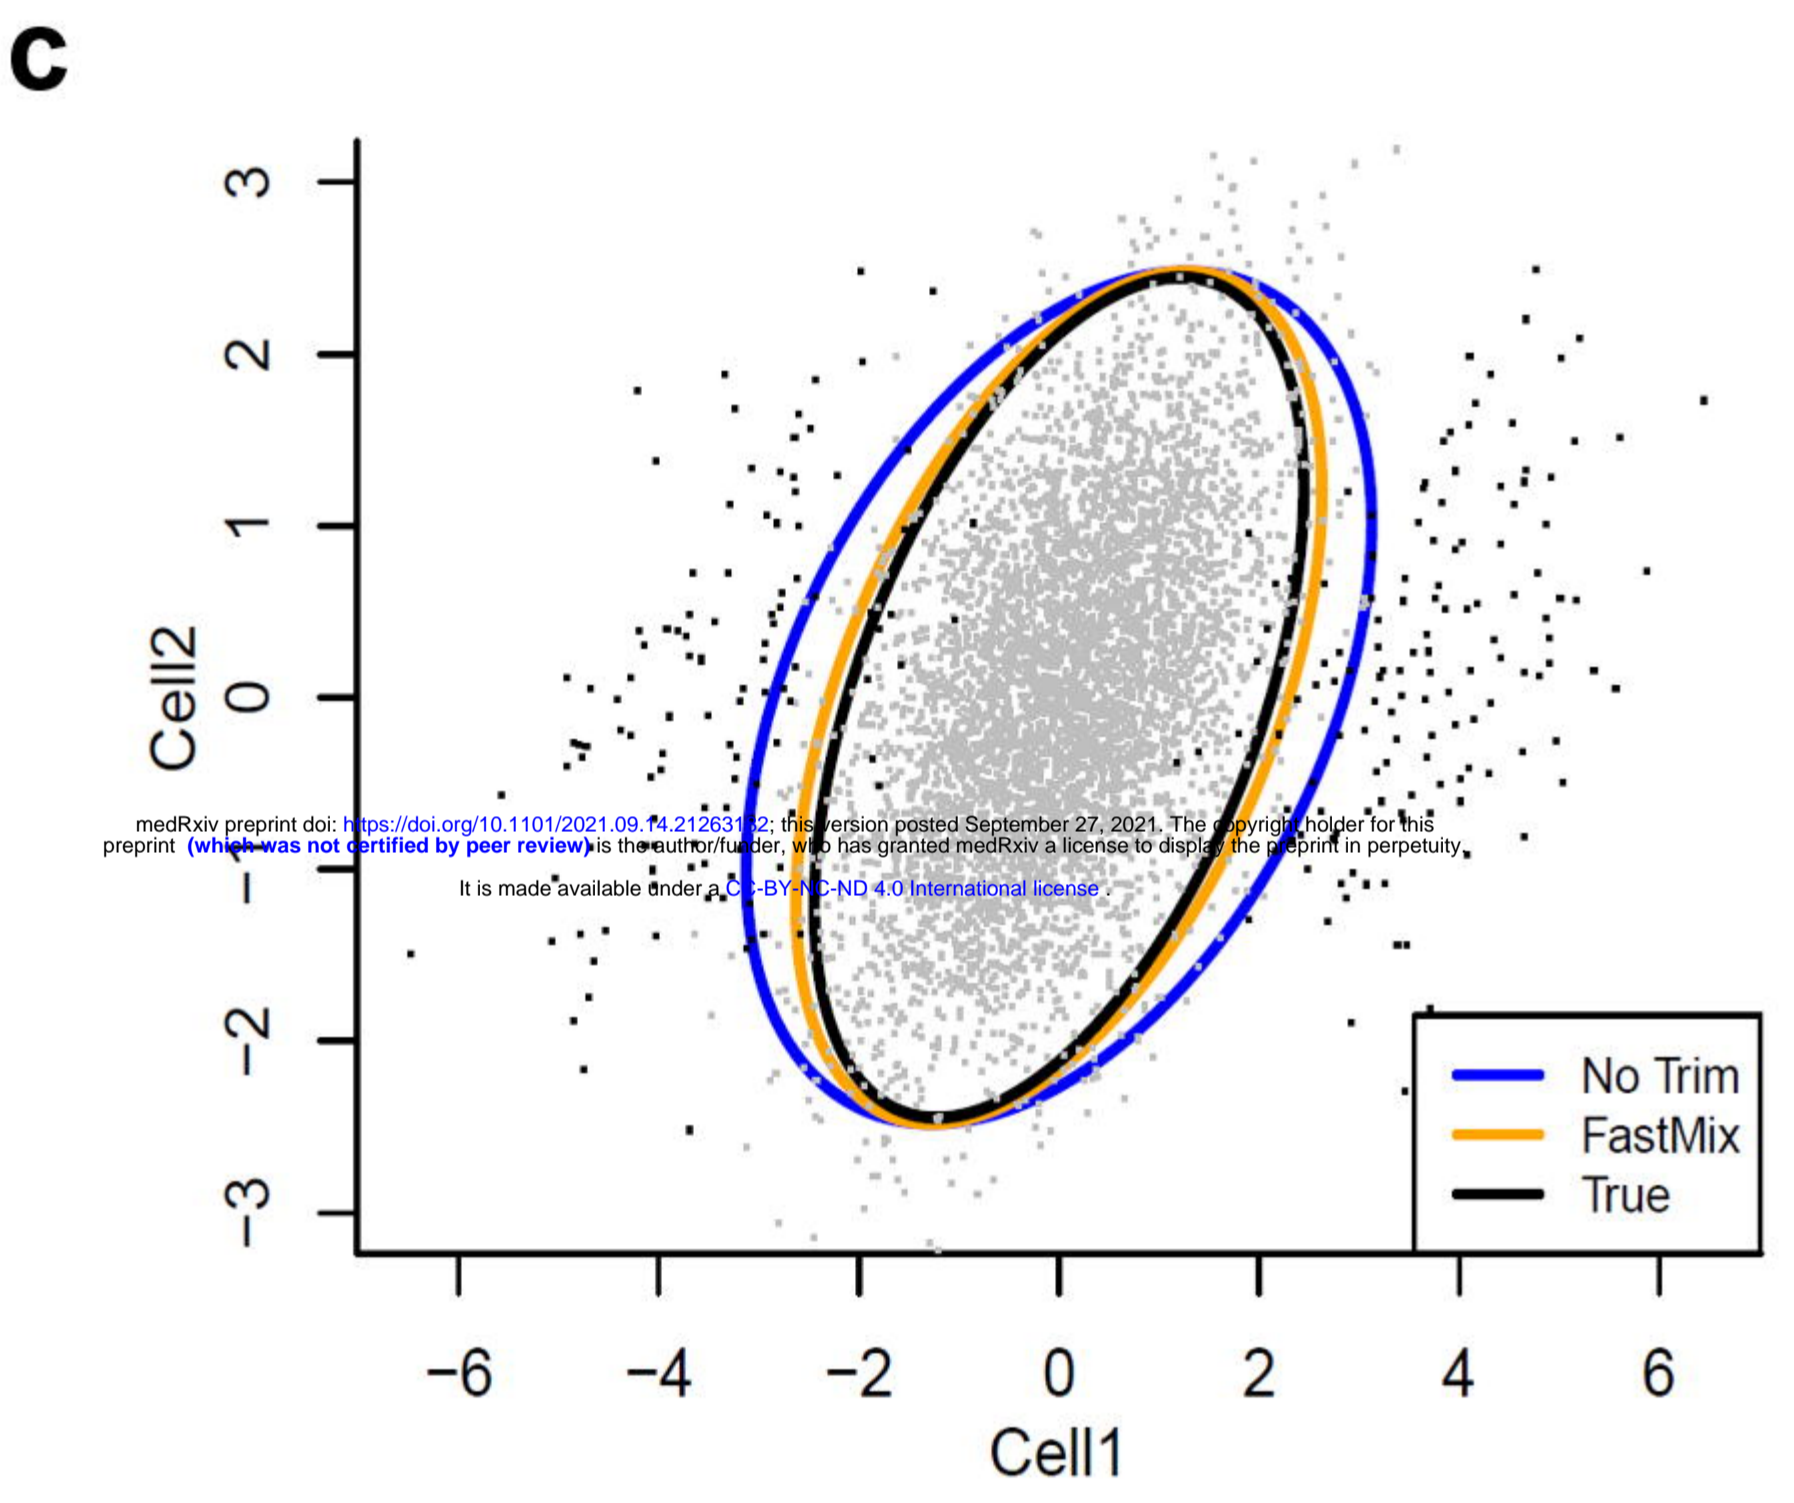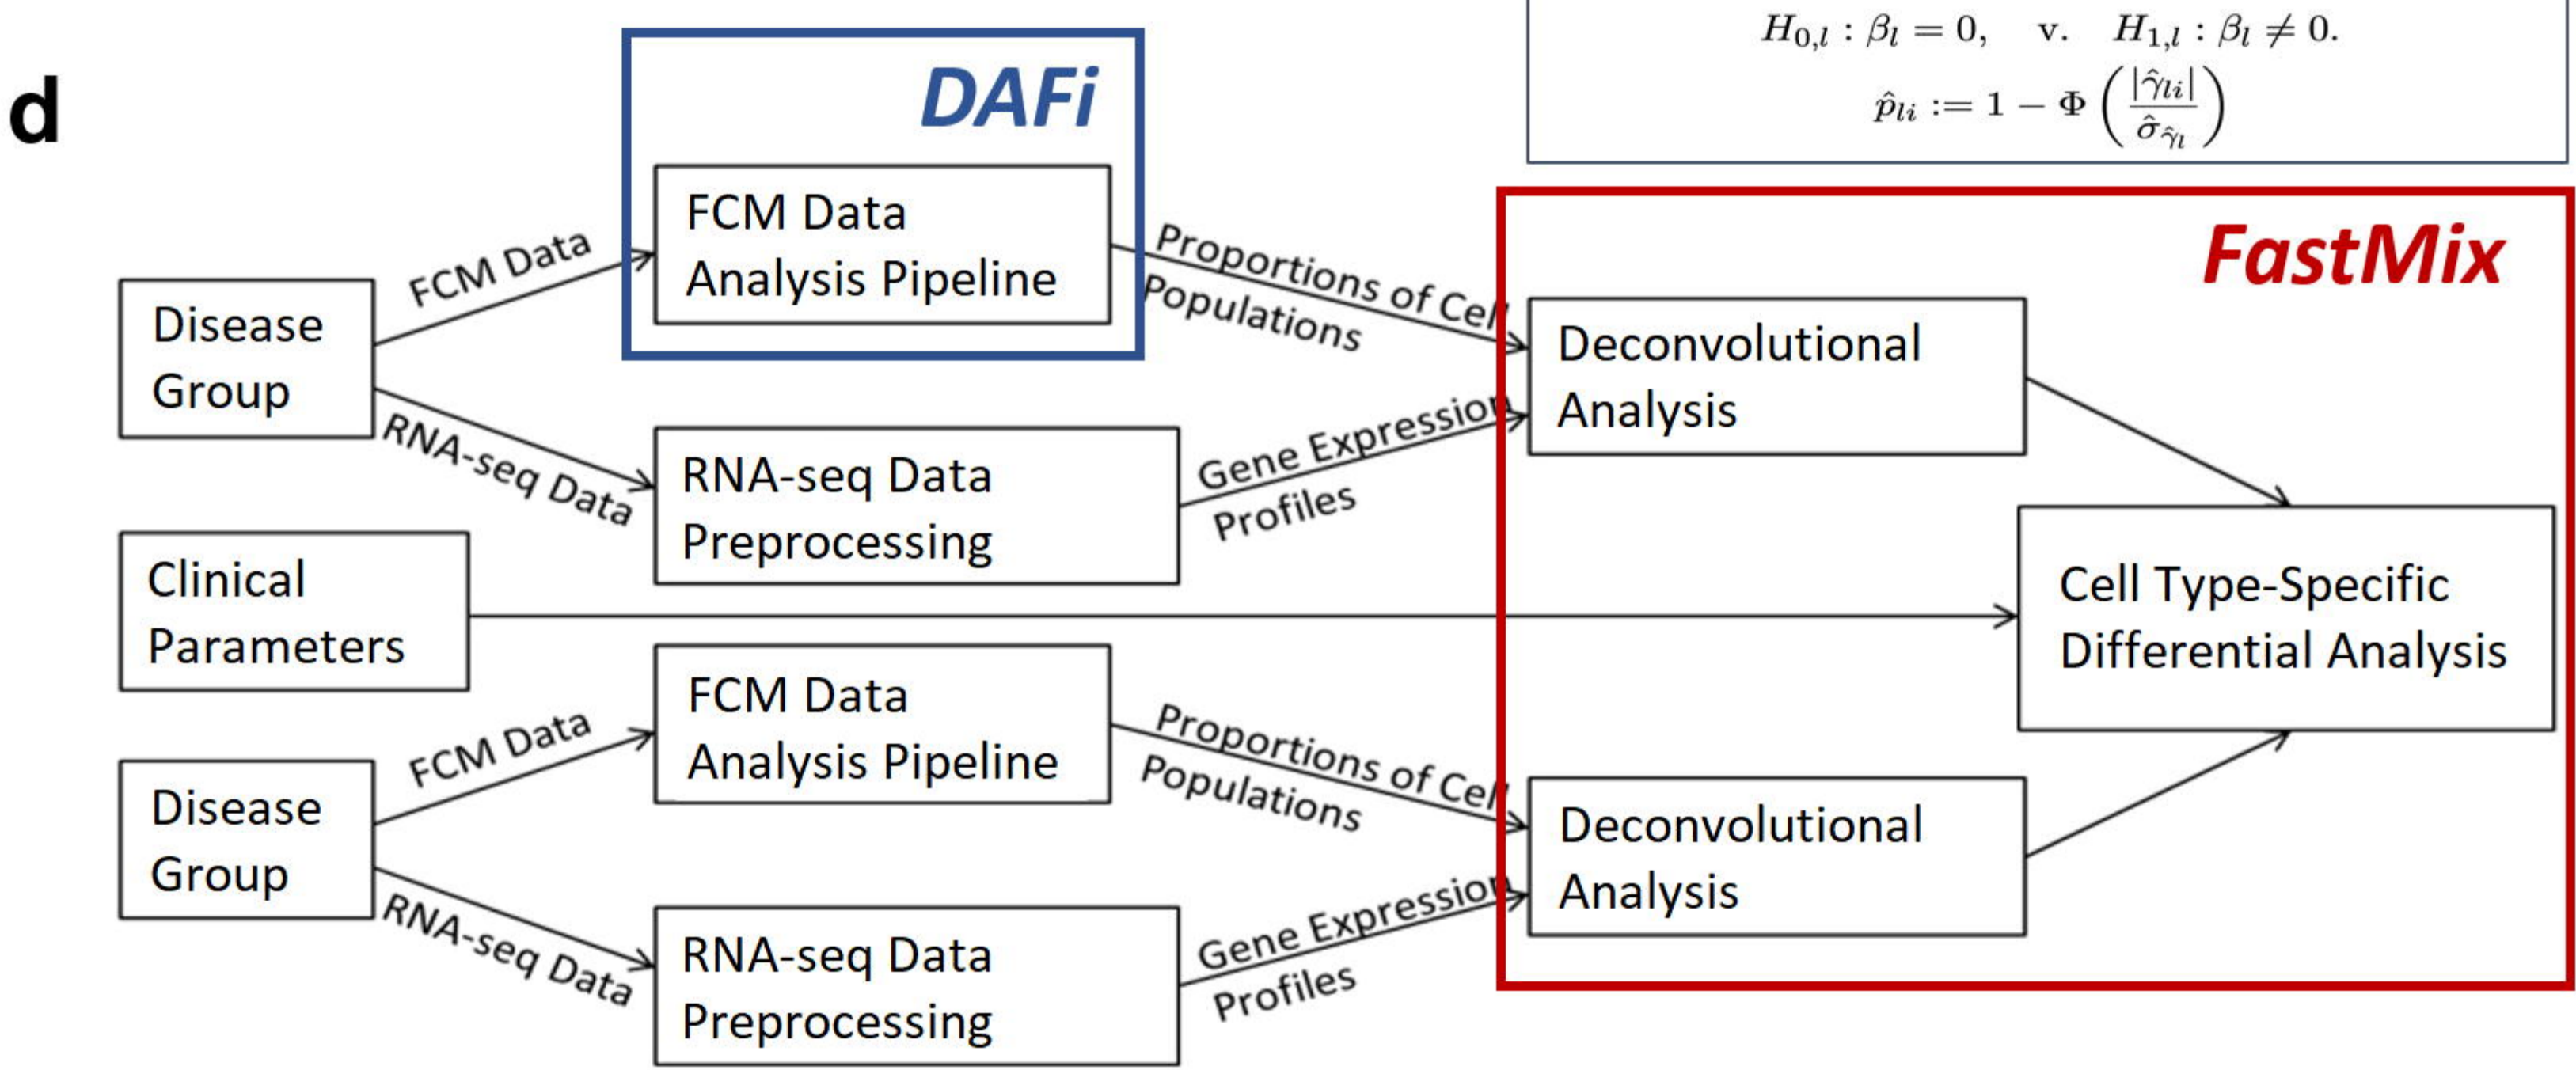

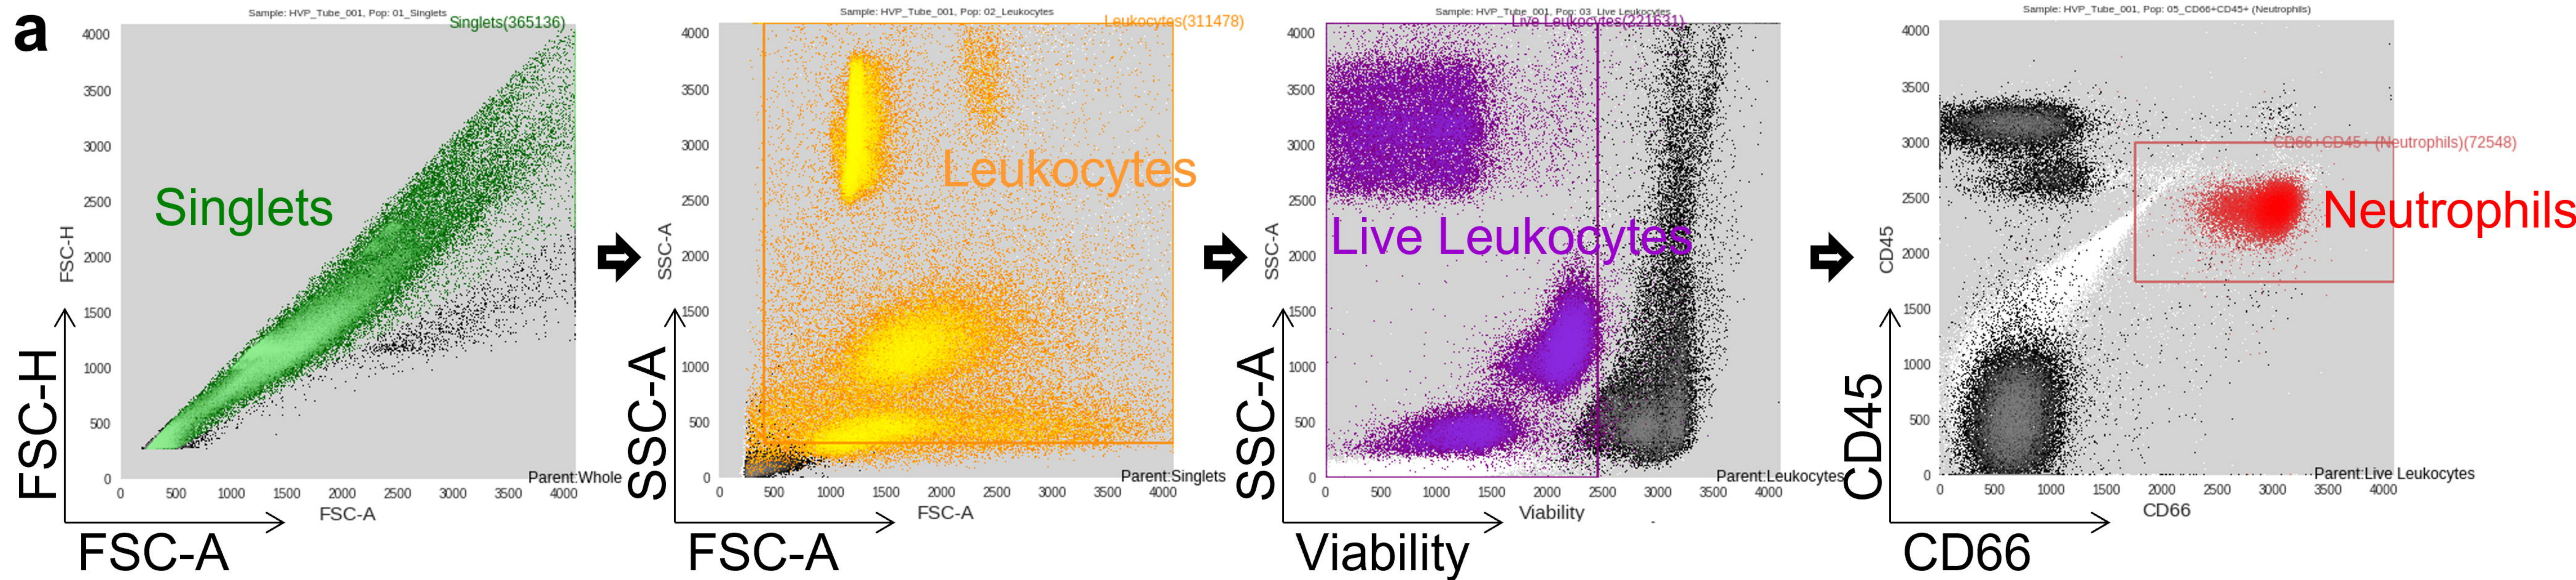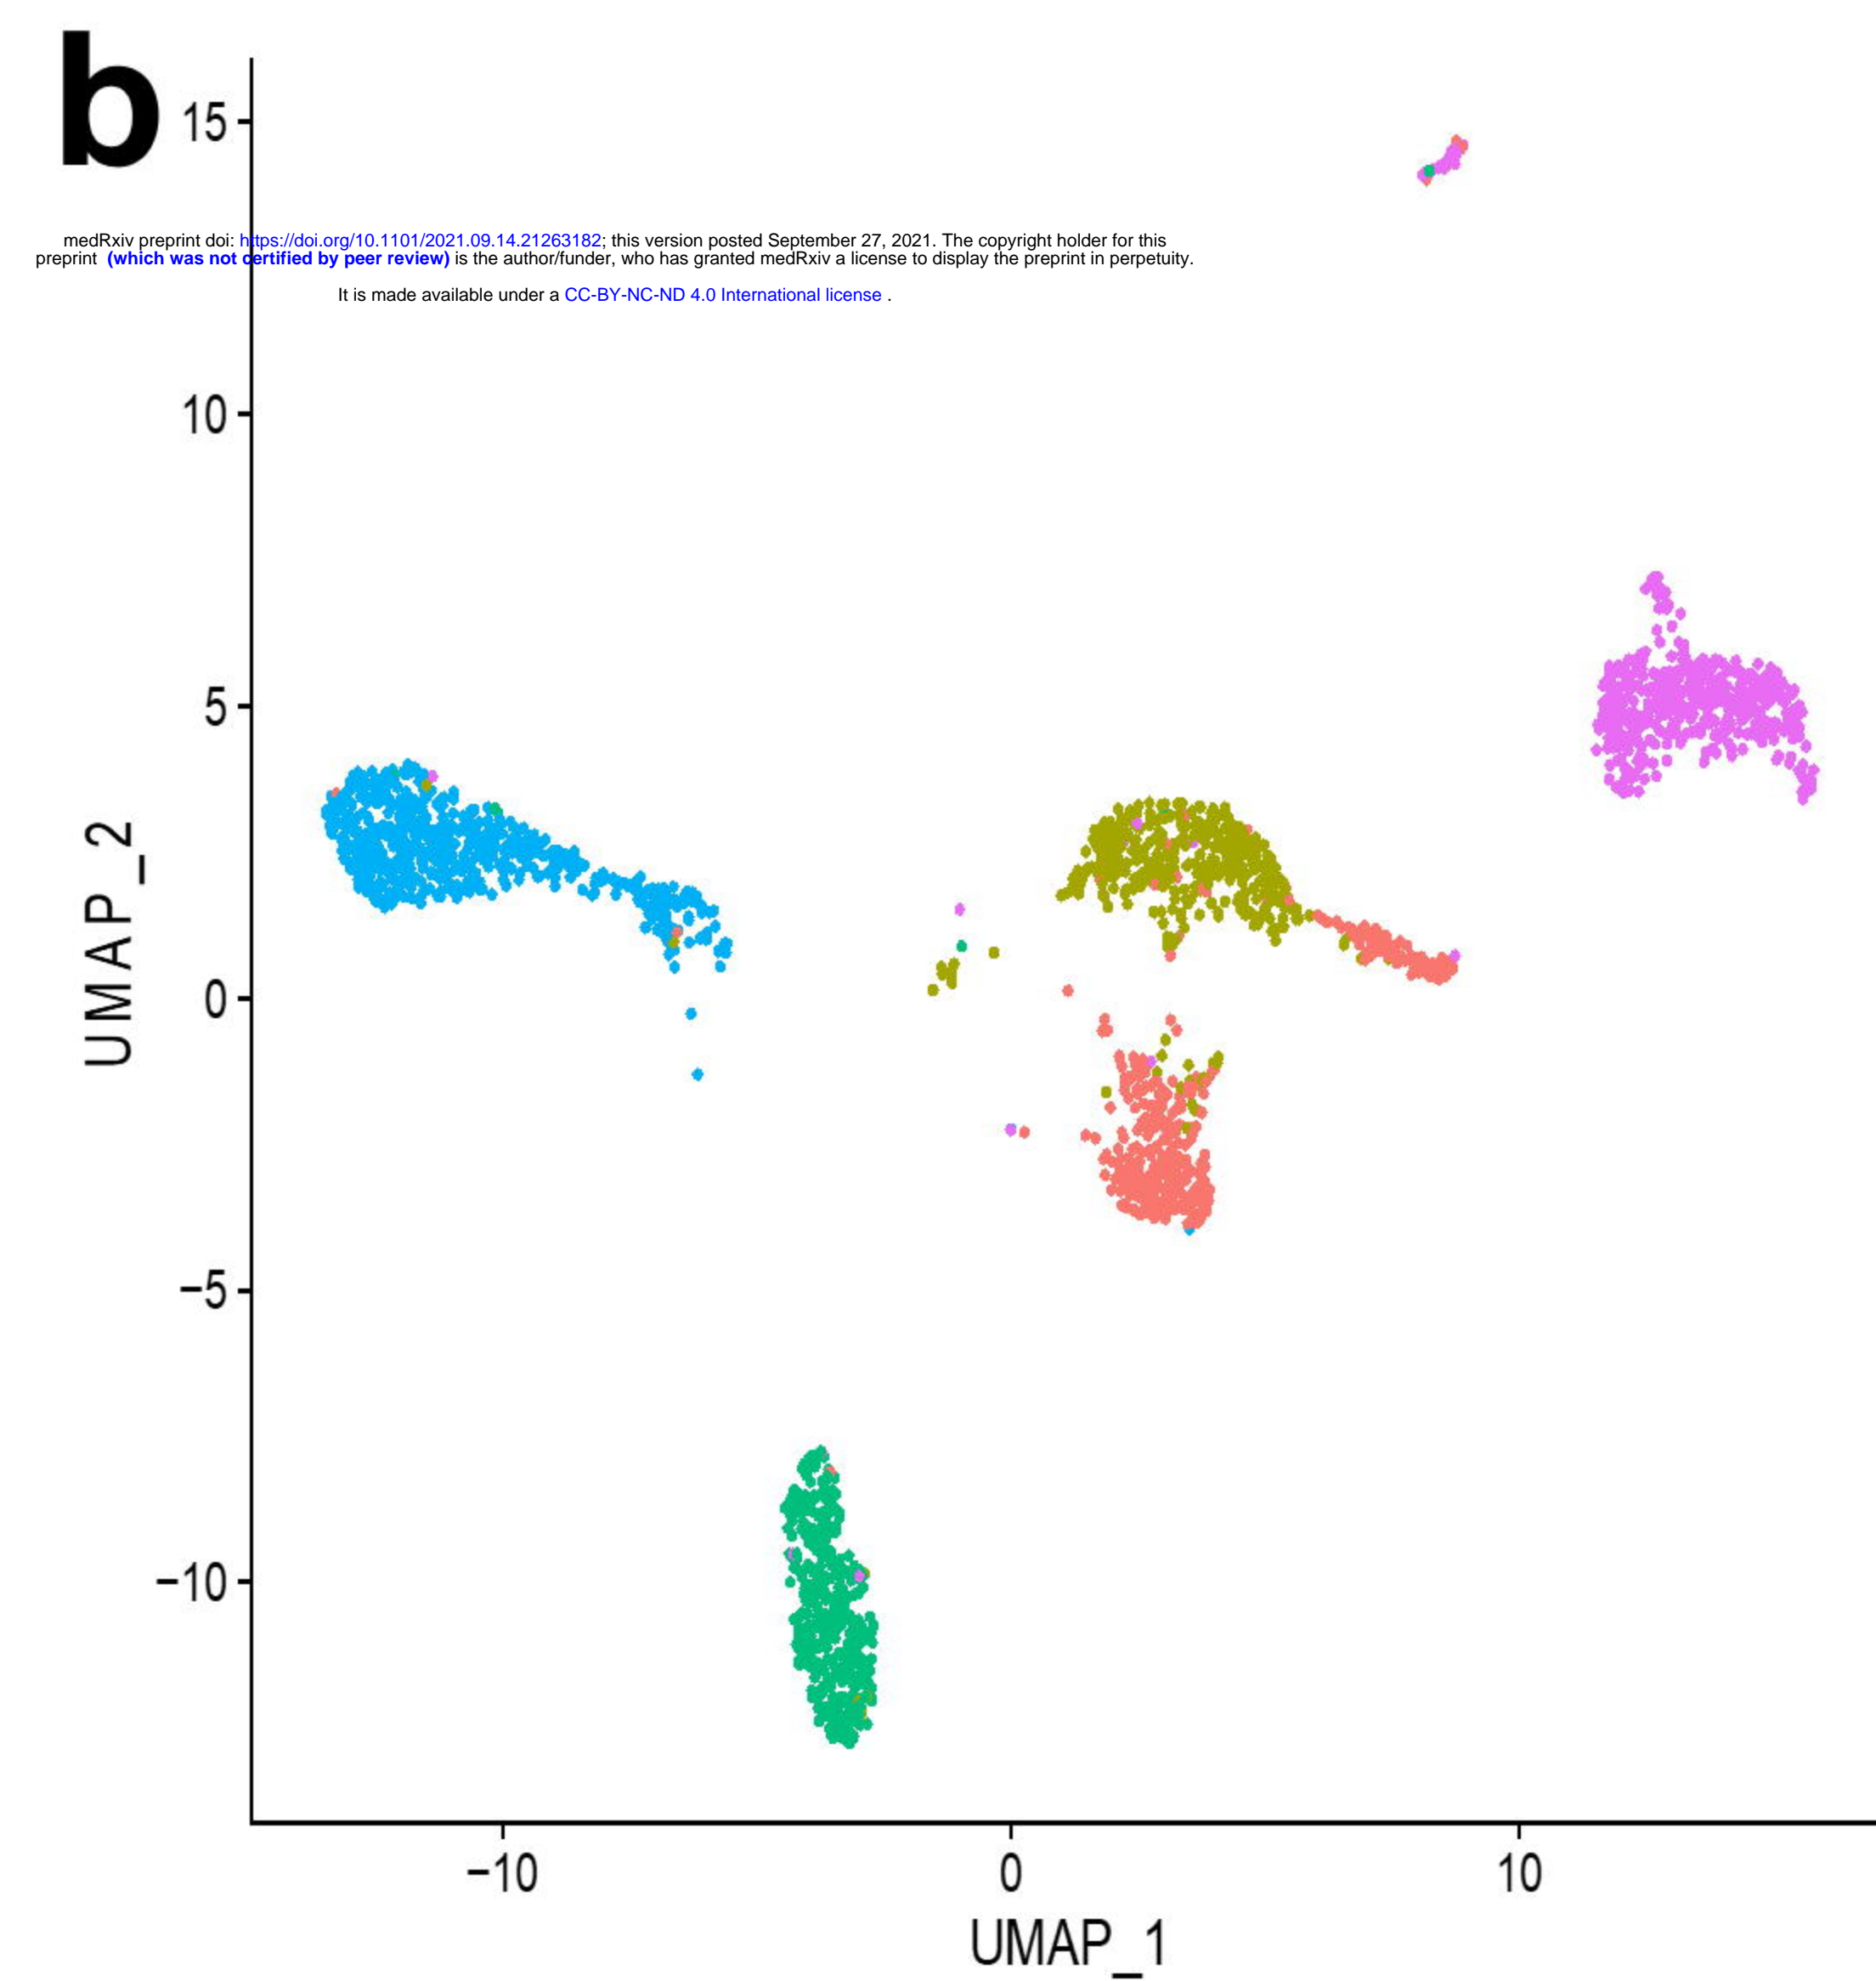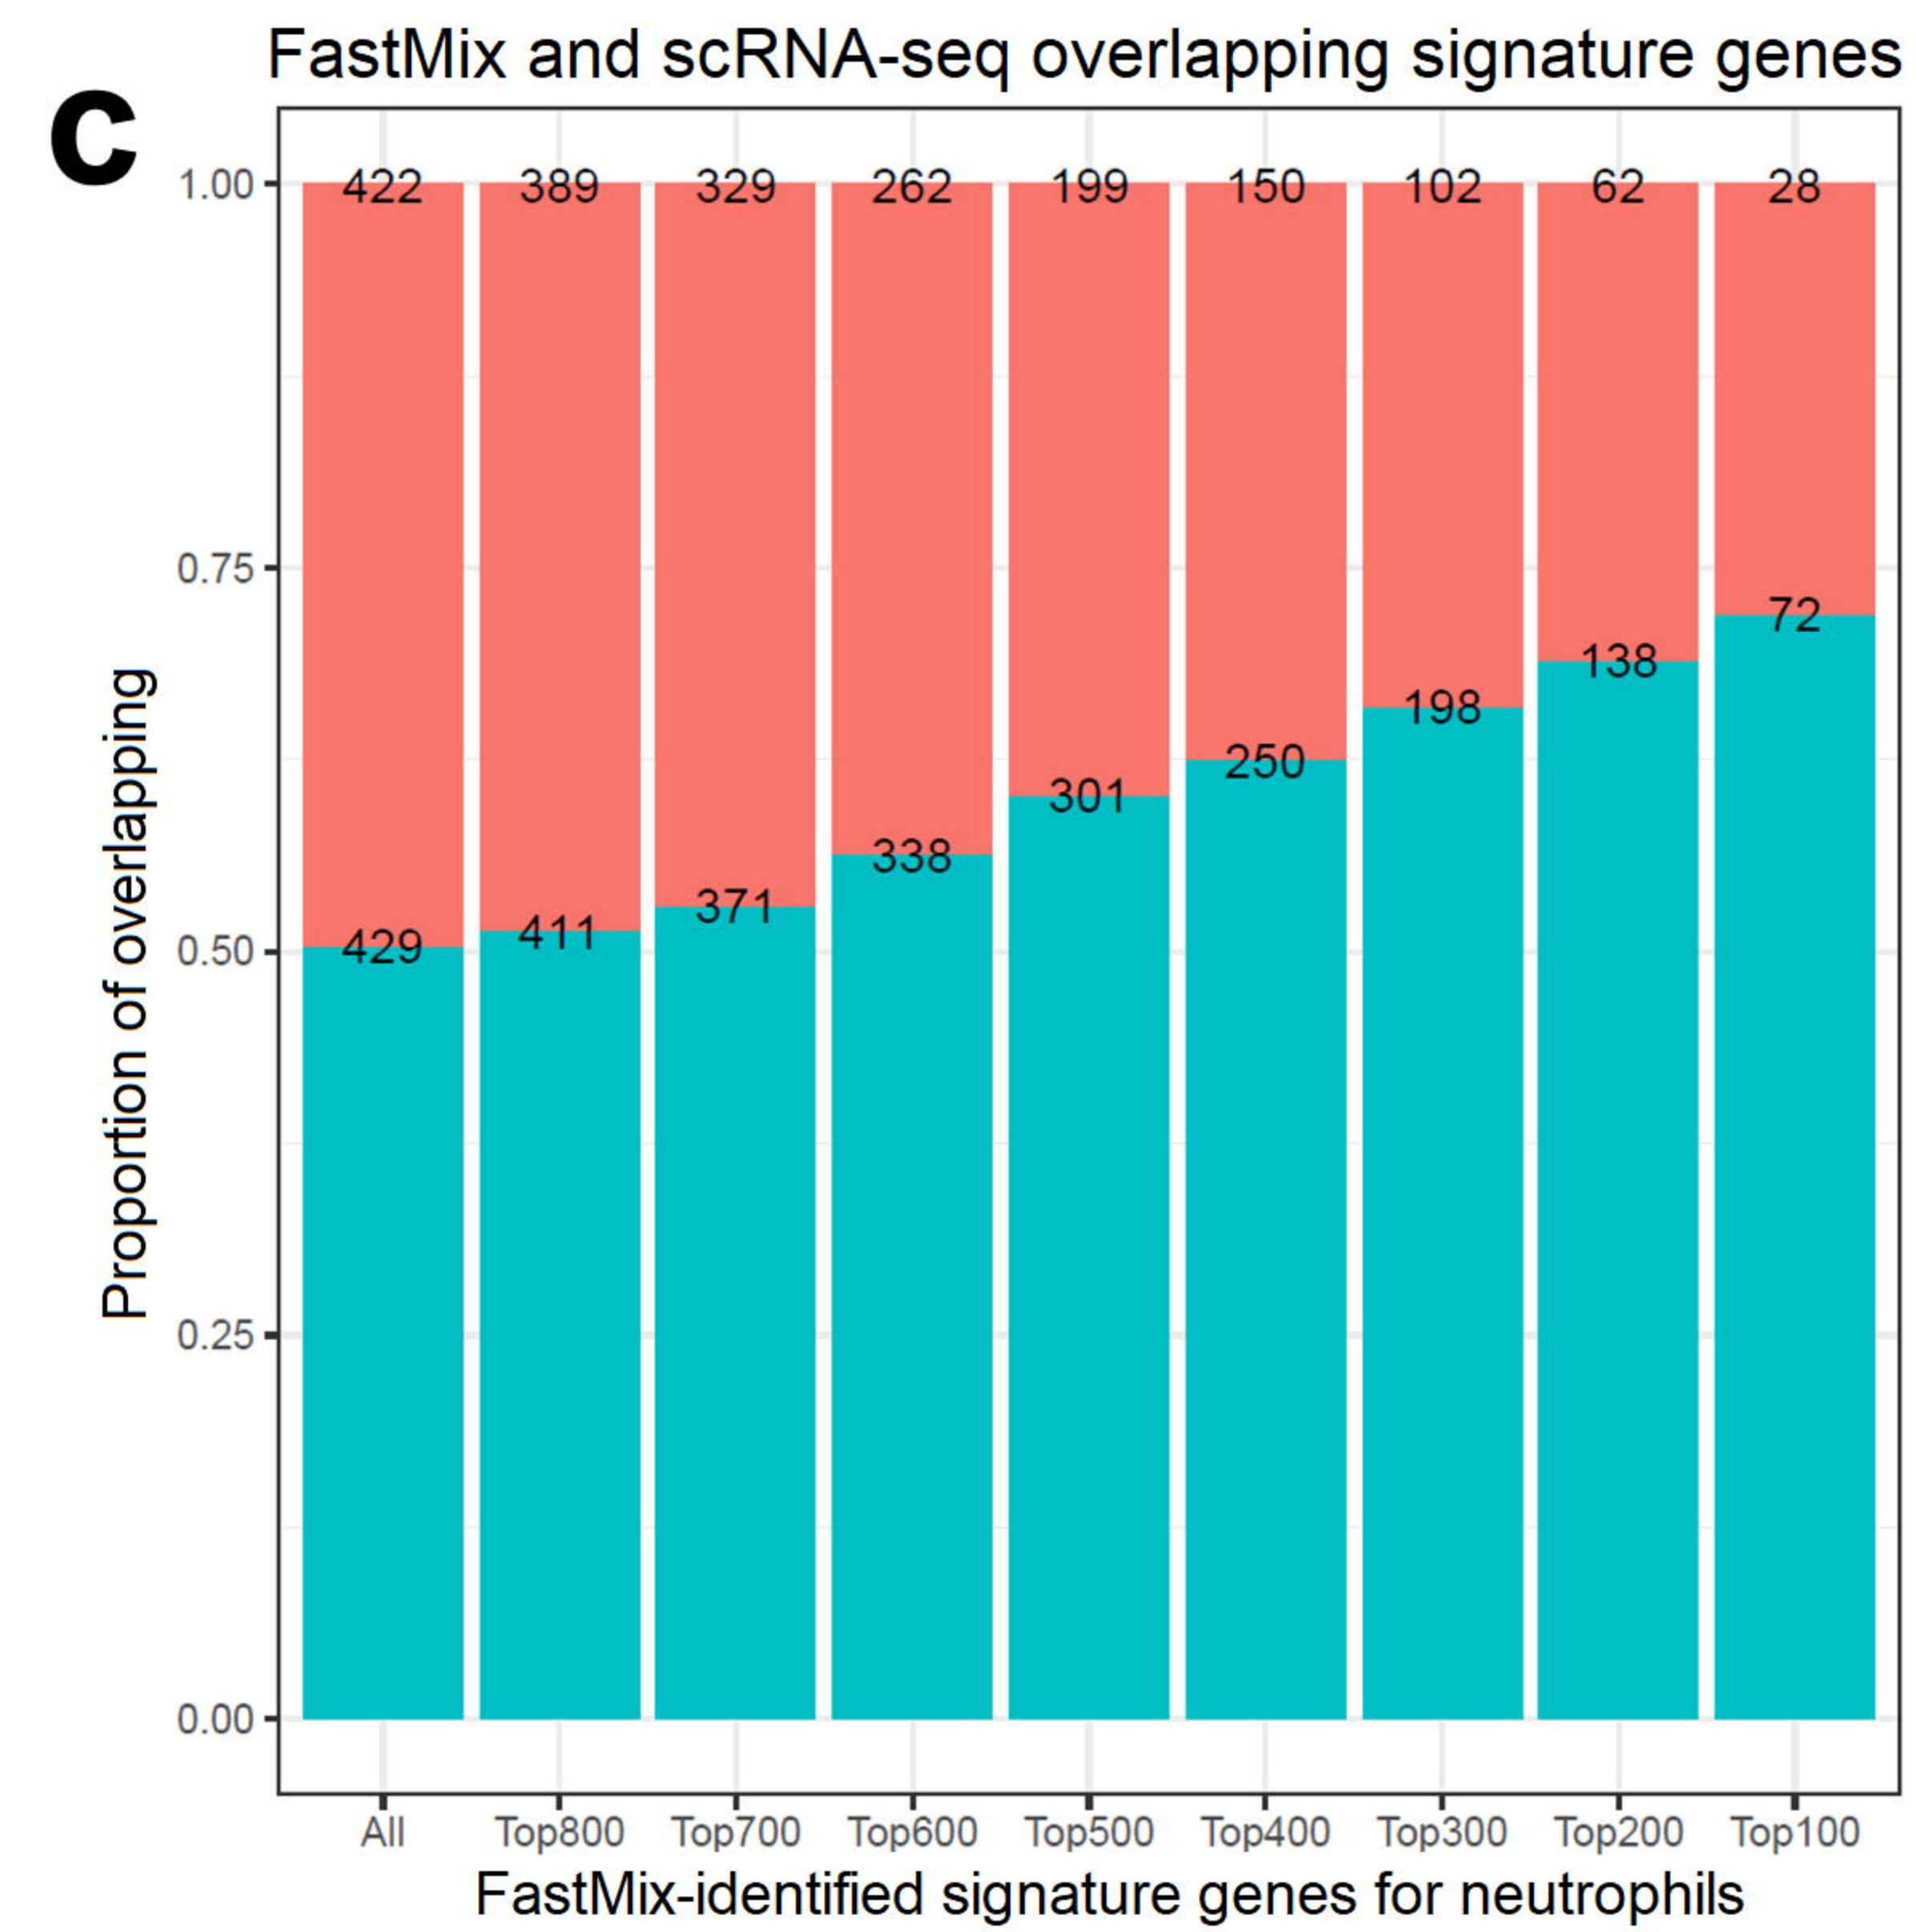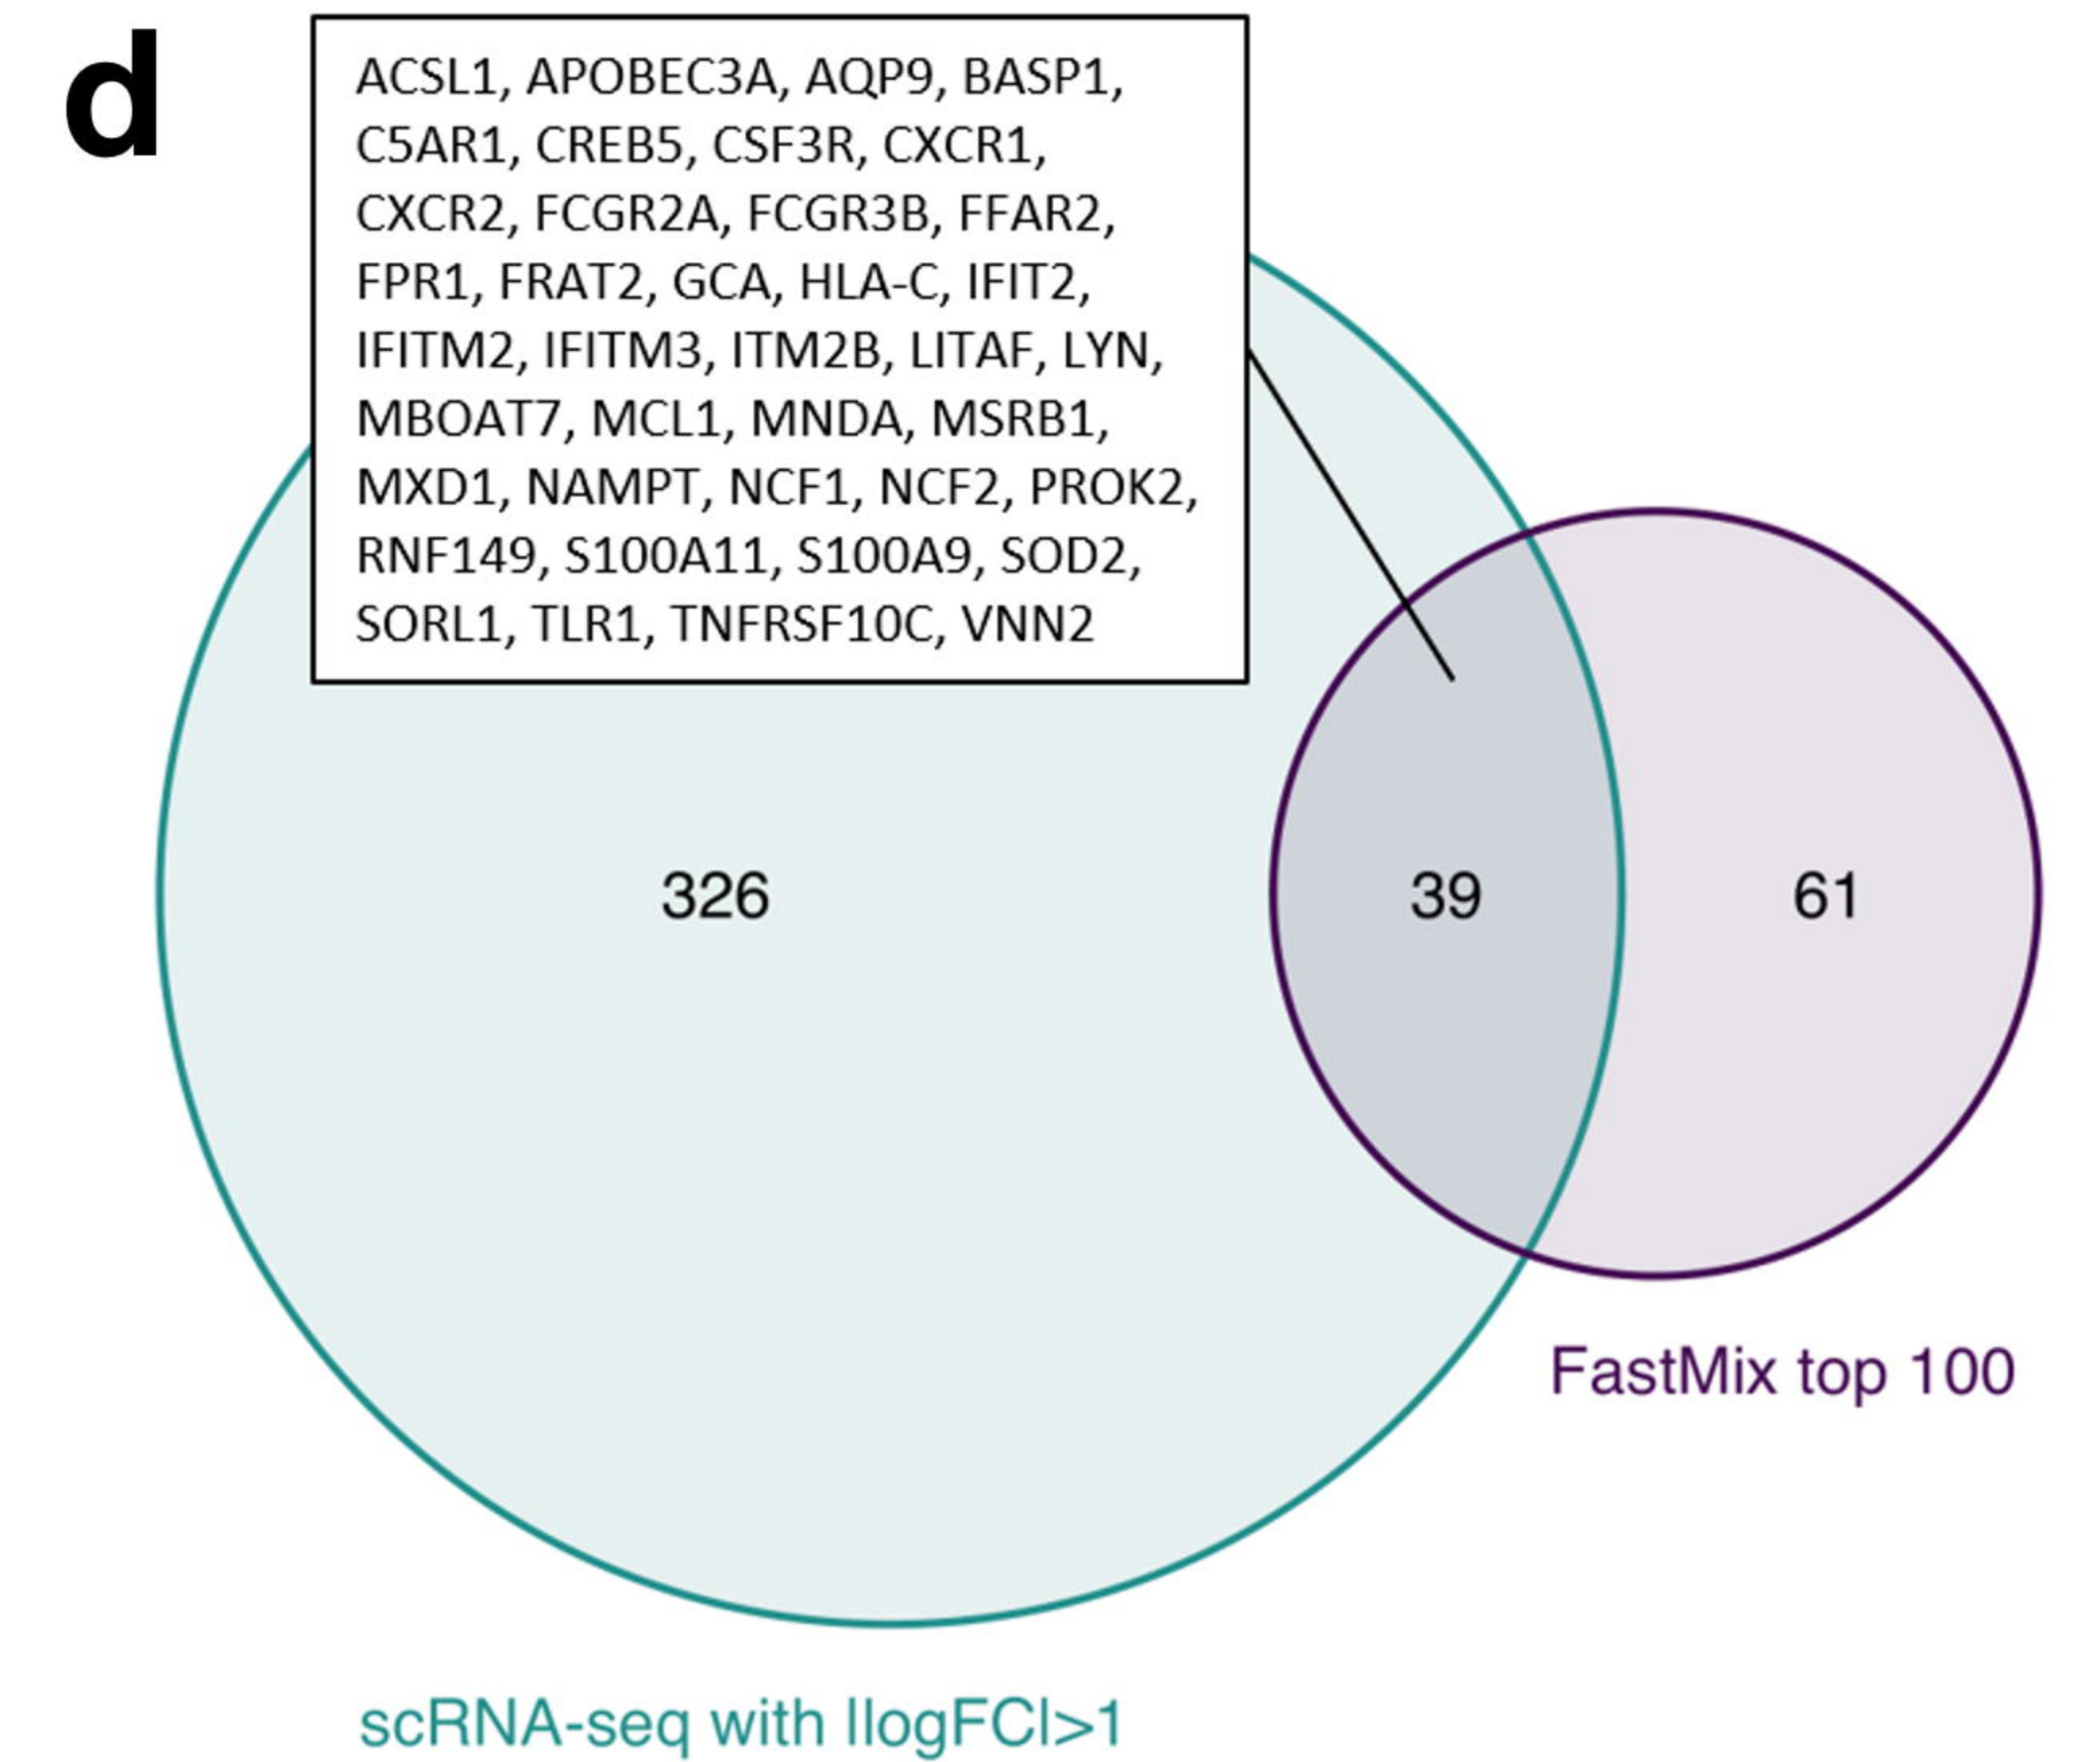

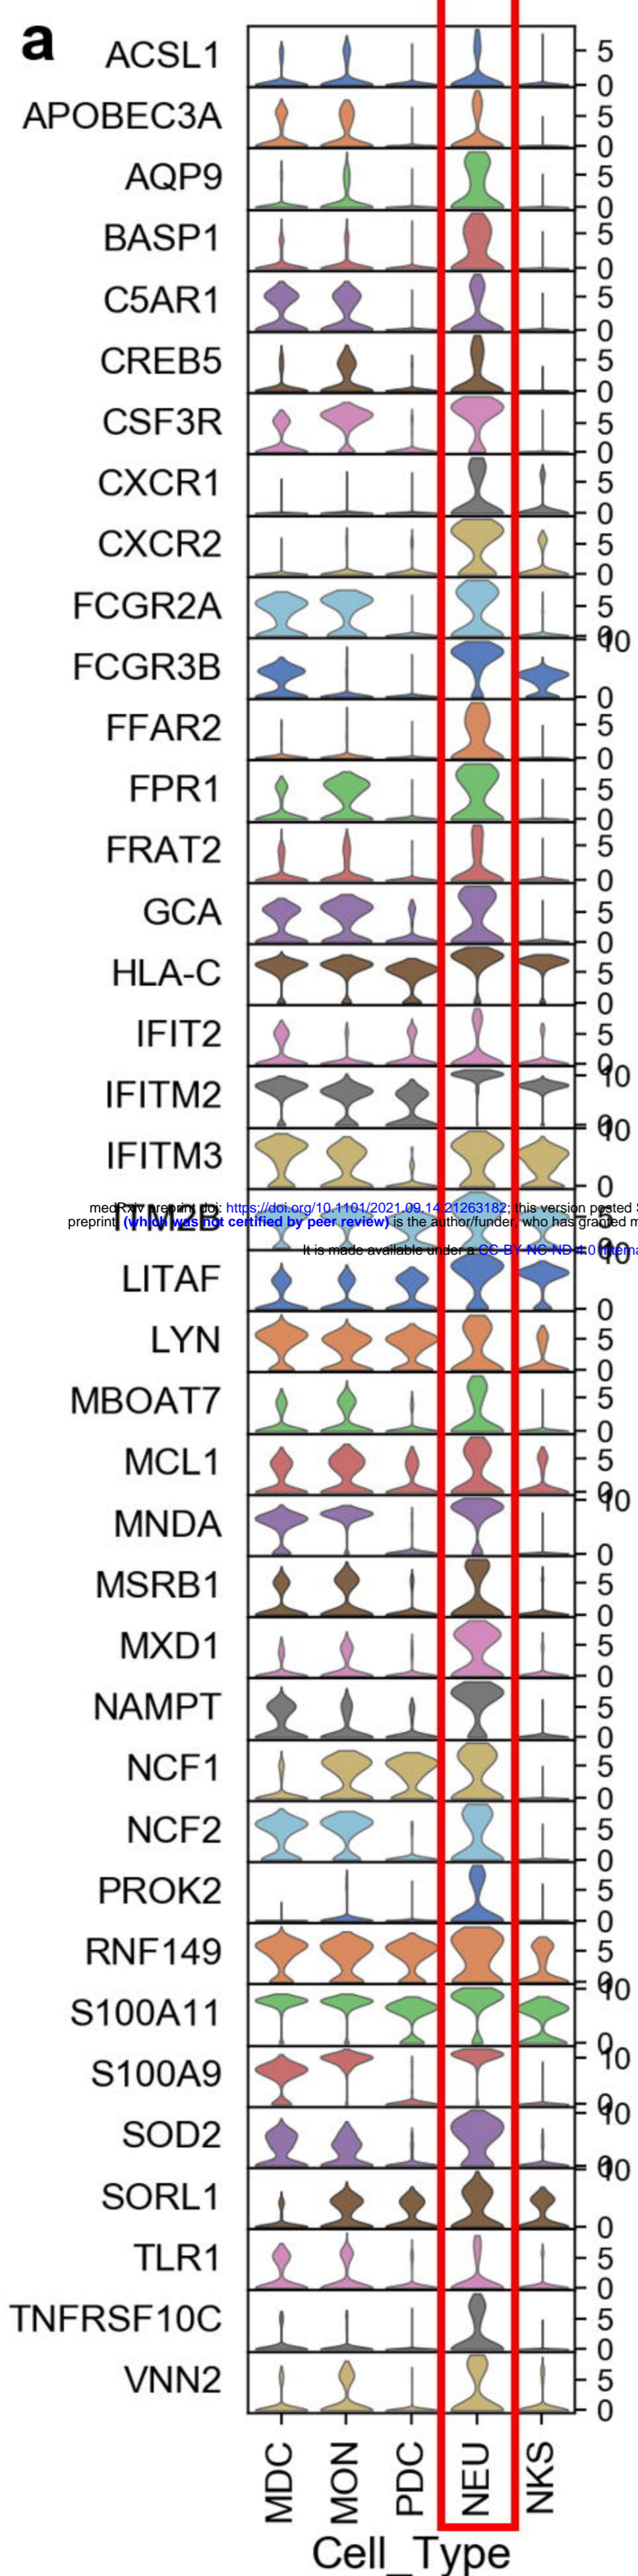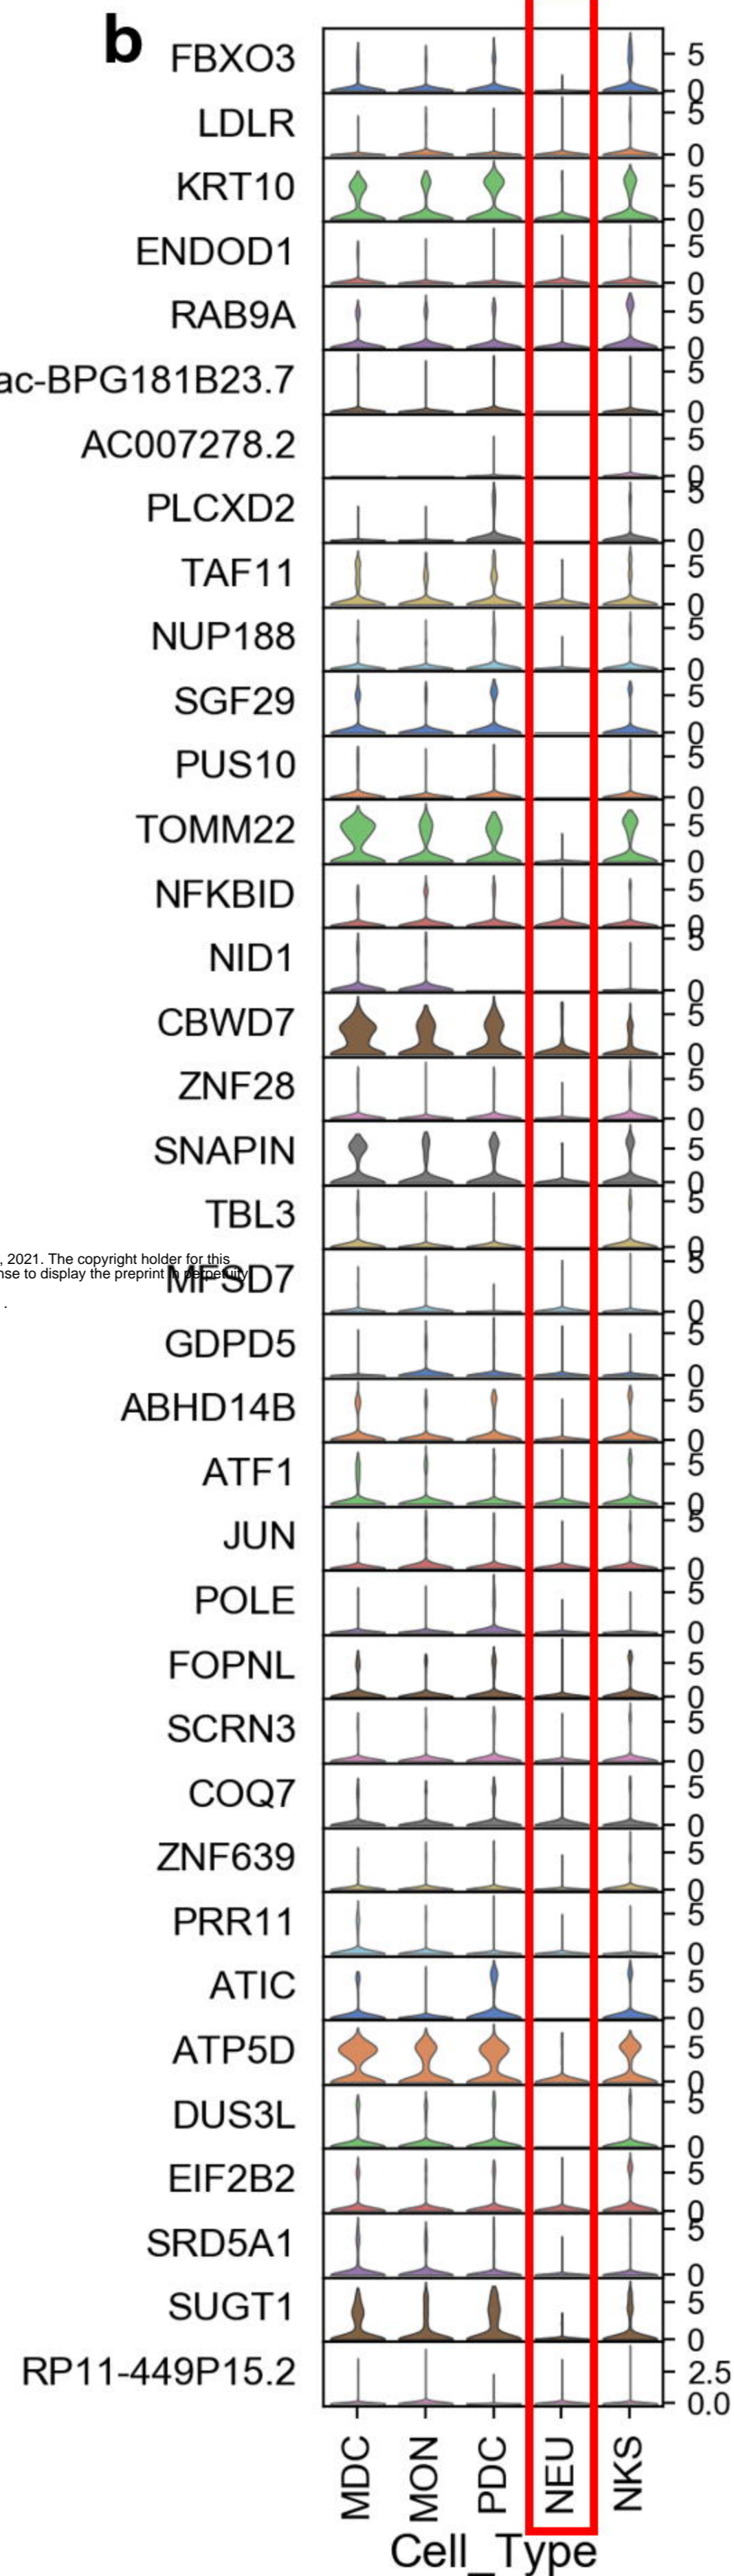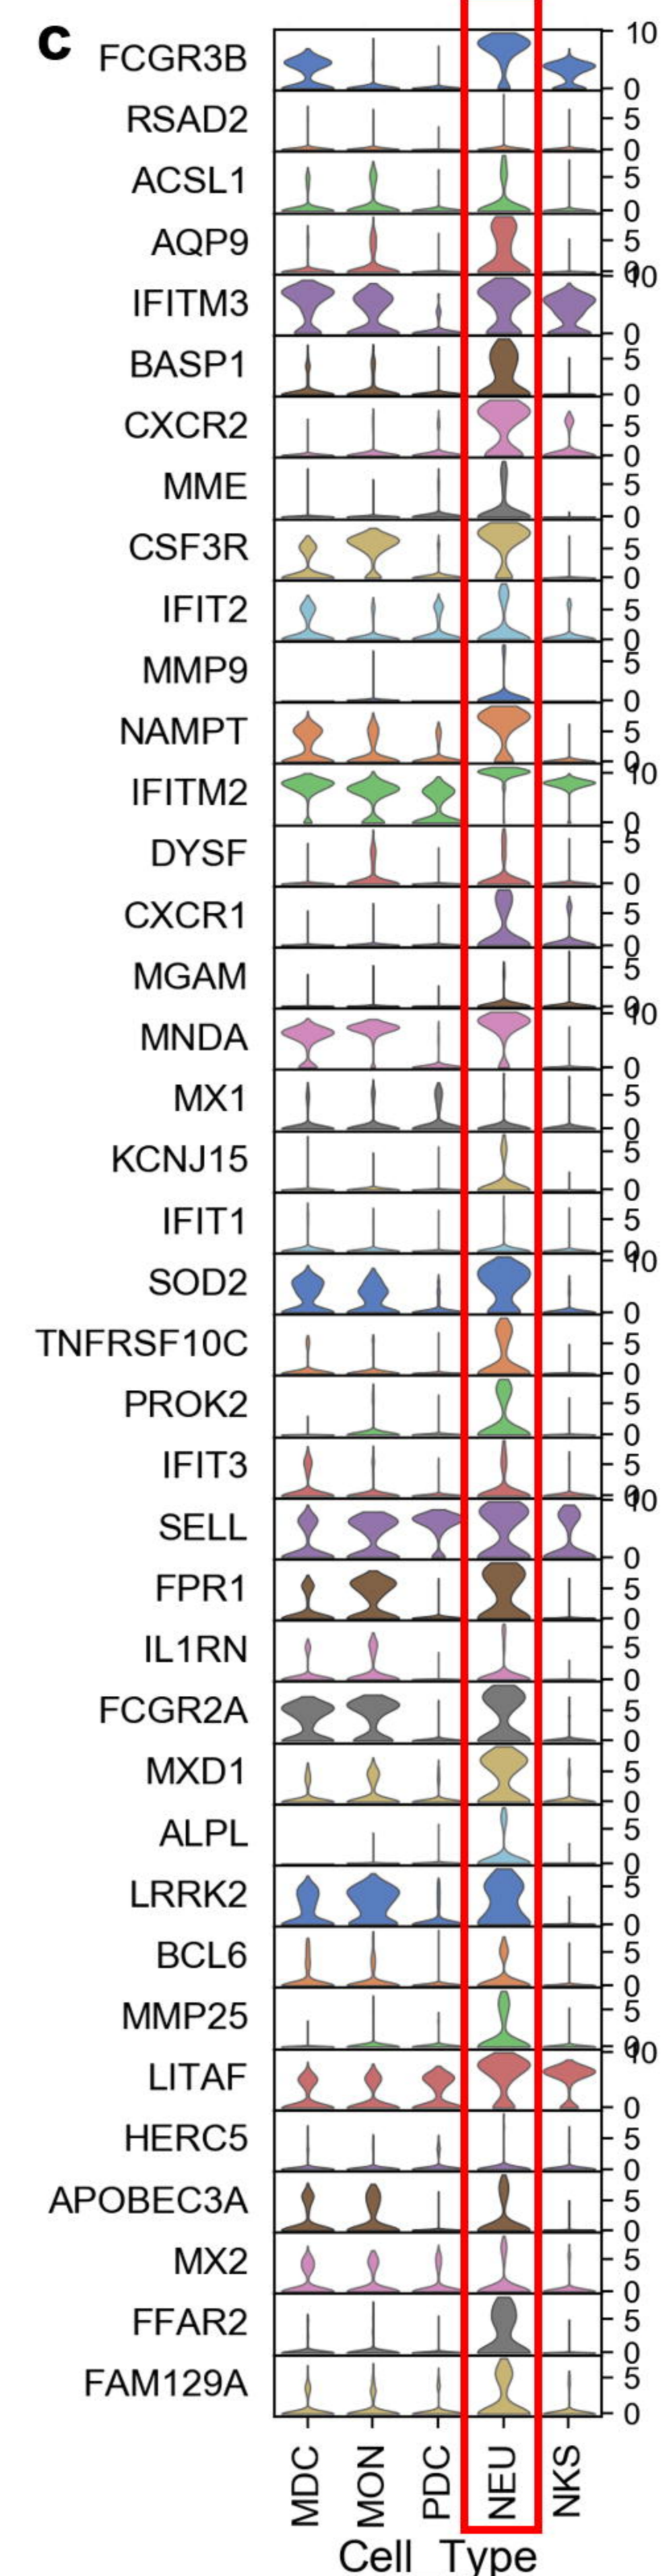

medRxiv preprint doi: <https://doi.org/10.1101/2021.09.14.21263182>; this version posted September 27, 2021. The copyright holder for this preprint (which was not certified by peer review) is the author/funder, who has granted medRxiv a license to display the preprint in perpetuity. It is made available under a CC-BY-NC-ND 4.0 International license.

**a**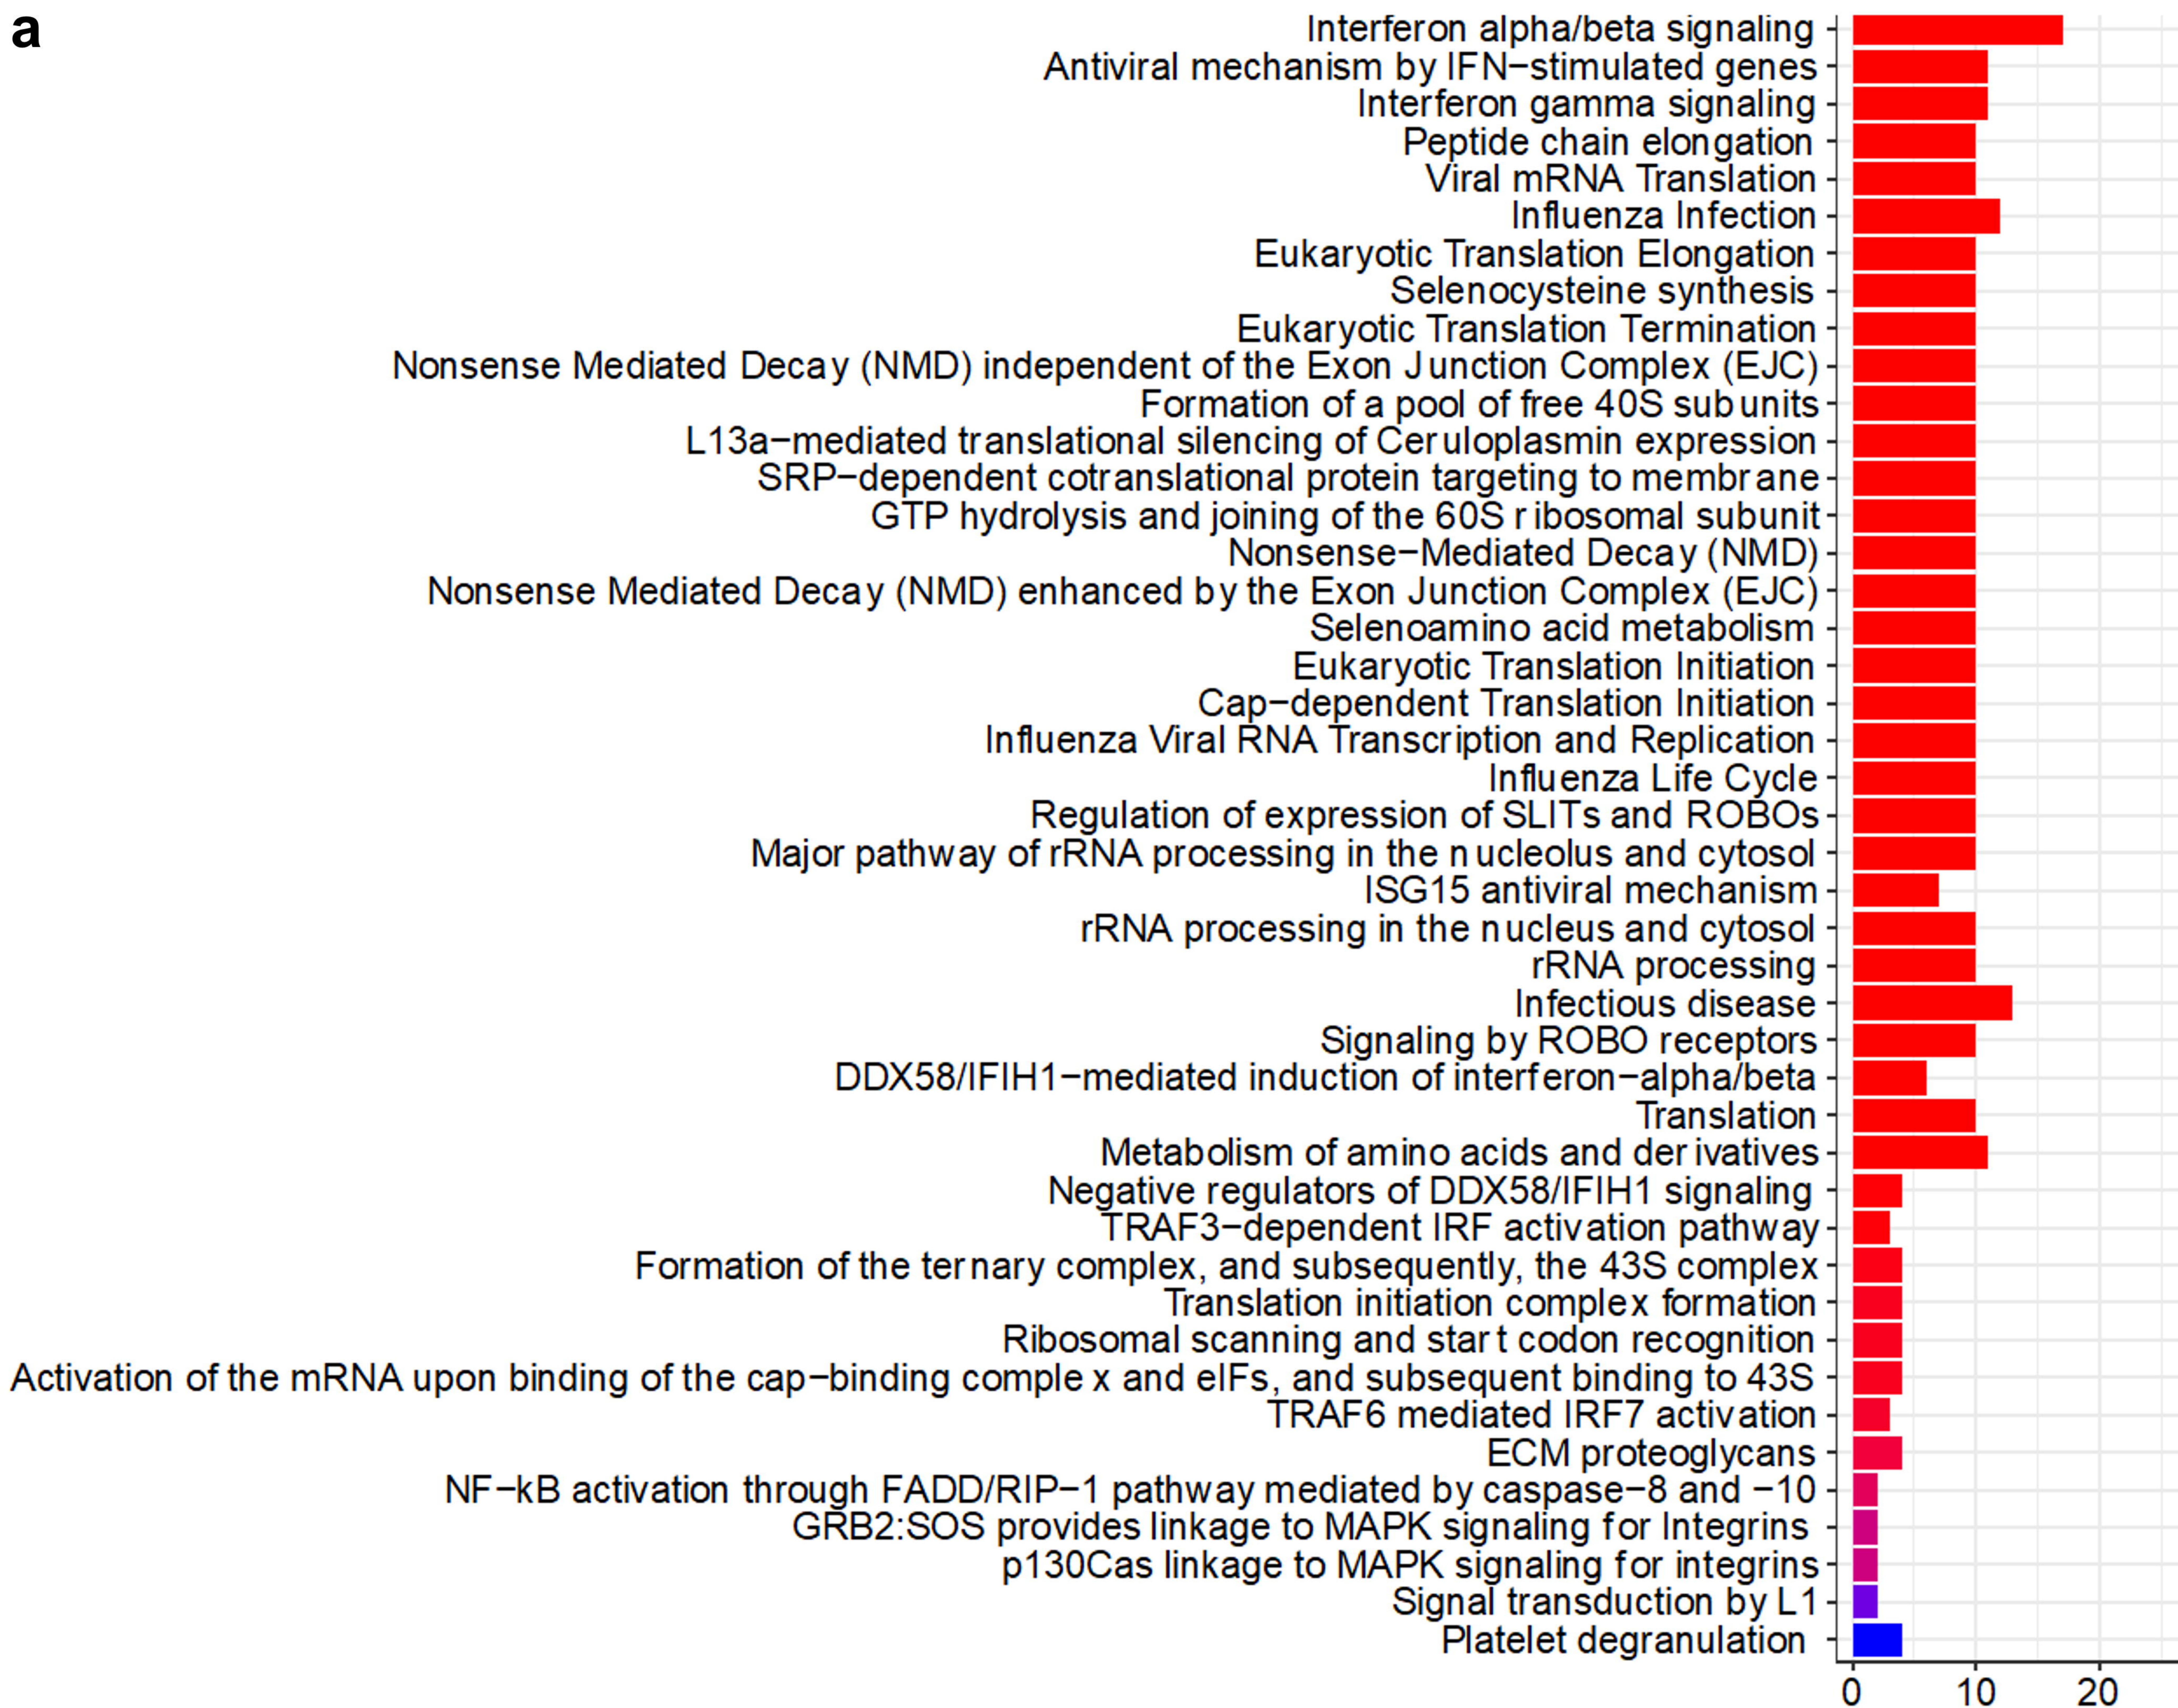**b**

| CD45pCD66p.Response | Gene     |
|---------------------|----------|
| 1                   | AGRN     |
| 2                   | BST2     |
| 3                   | CHMP5    |
| 4                   | DDX58    |
| 5                   | DHX58    |
| 6                   | EIF2AK2  |
| 7                   | FCGR1B   |
| 8                   | GBP1     |
| 9                   | GBP3     |
| 10                  | GBP5     |
| 11                  | HERC5    |
| 12                  | IDO1     |
| 13                  | IFI35    |
| 14                  | IFI6     |
| 15                  | IFIH1    |
| 16                  | IFIT1    |
| 17                  | IFIT2    |
| 18                  | IFIT3    |
| 19                  | IFITM3   |
| 20                  | IRF7     |
| 21                  | ISG15    |
| 22                  | ITGA2B   |
| 23                  | ITGB3    |
| 24                  | MT2A     |
| 25                  | MX1      |
| 26                  | OAS1     |
| 27                  | OAS2     |
| 28                  | OAS3     |
| 29                  | OASL     |
| 30                  | RPL23    |
| 31                  | RPL27    |
| 32                  | RPL31    |
| 33                  | RPL34    |
| 34                  | RPL39    |
| 35                  | RPL9     |
| 36                  | RPS15A   |
| 37                  | RPS3A    |
| 38                  | RPS4Y1   |
| 39                  | RPS7     |
| 40                  | RSAD2    |
| 41                  | SERPING1 |
| 42                  | SPARC    |
| 43                  | TRIM22   |
| 44                  | USP18    |
| 45                  | XAF1     |

**c**

Wiegthed FastMix model with response and age

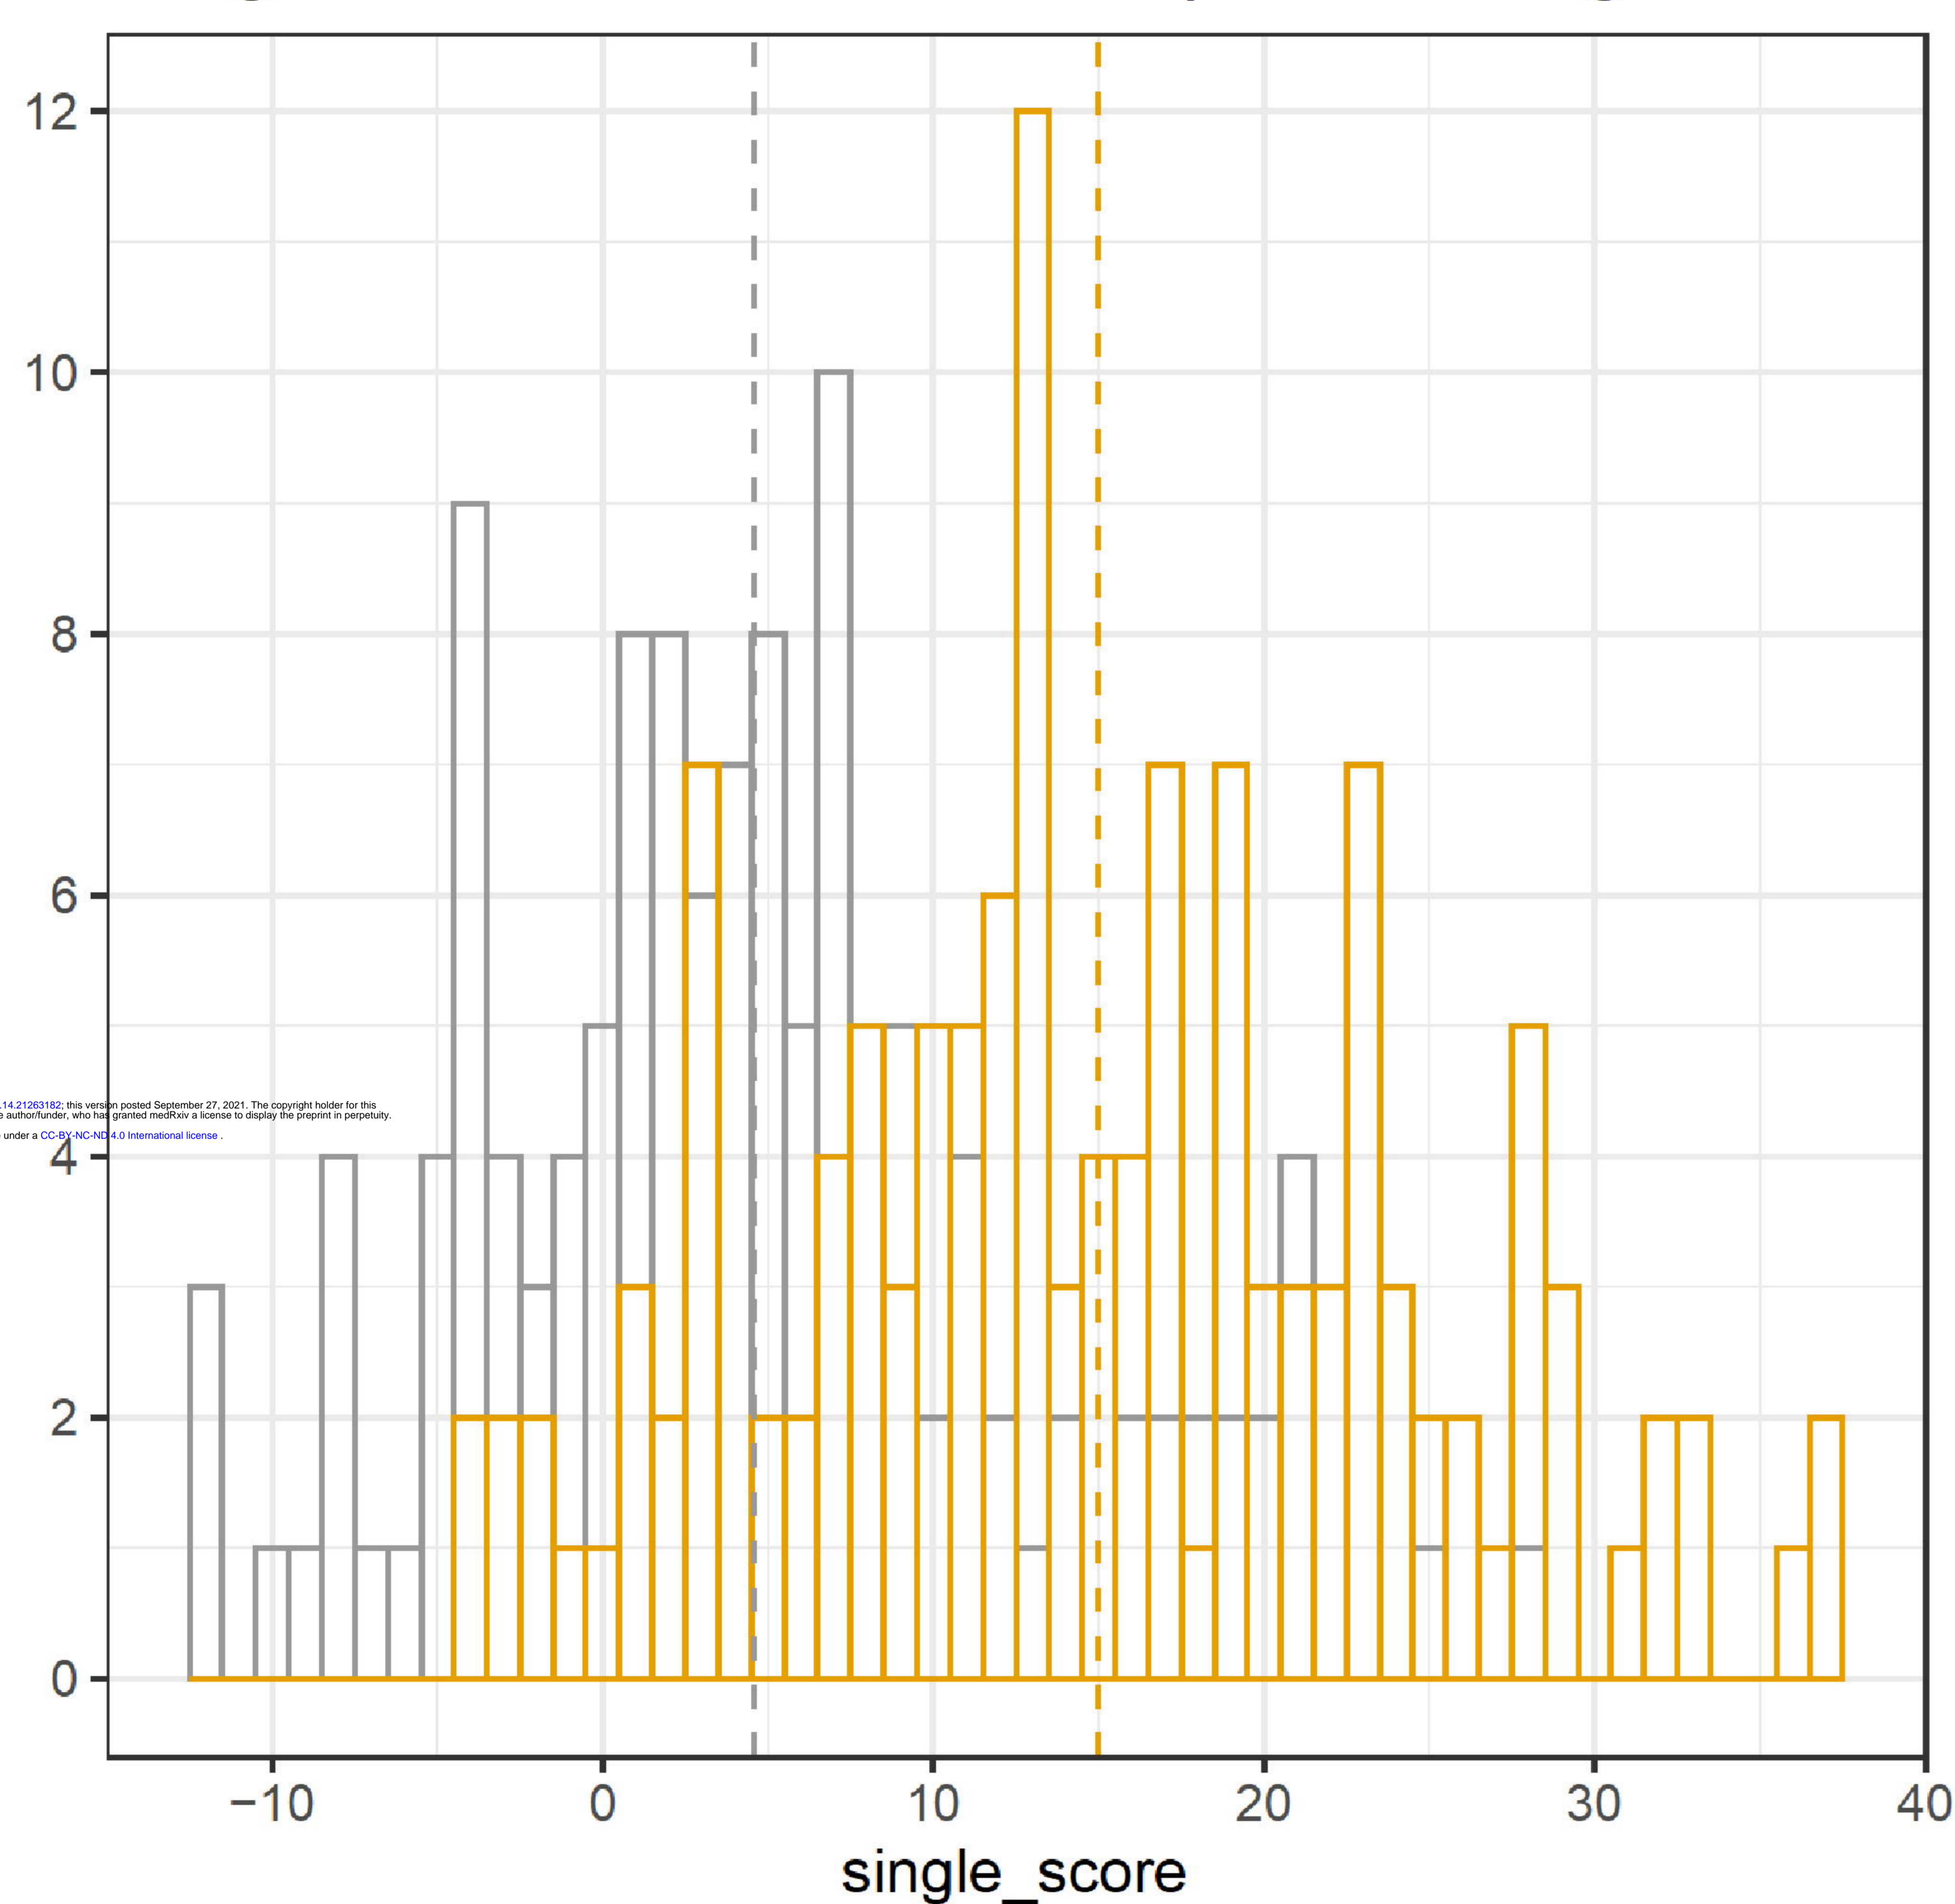

Wilcoxon p-value = 1.9e-16

**d**

Wiegthed FastMix model with response

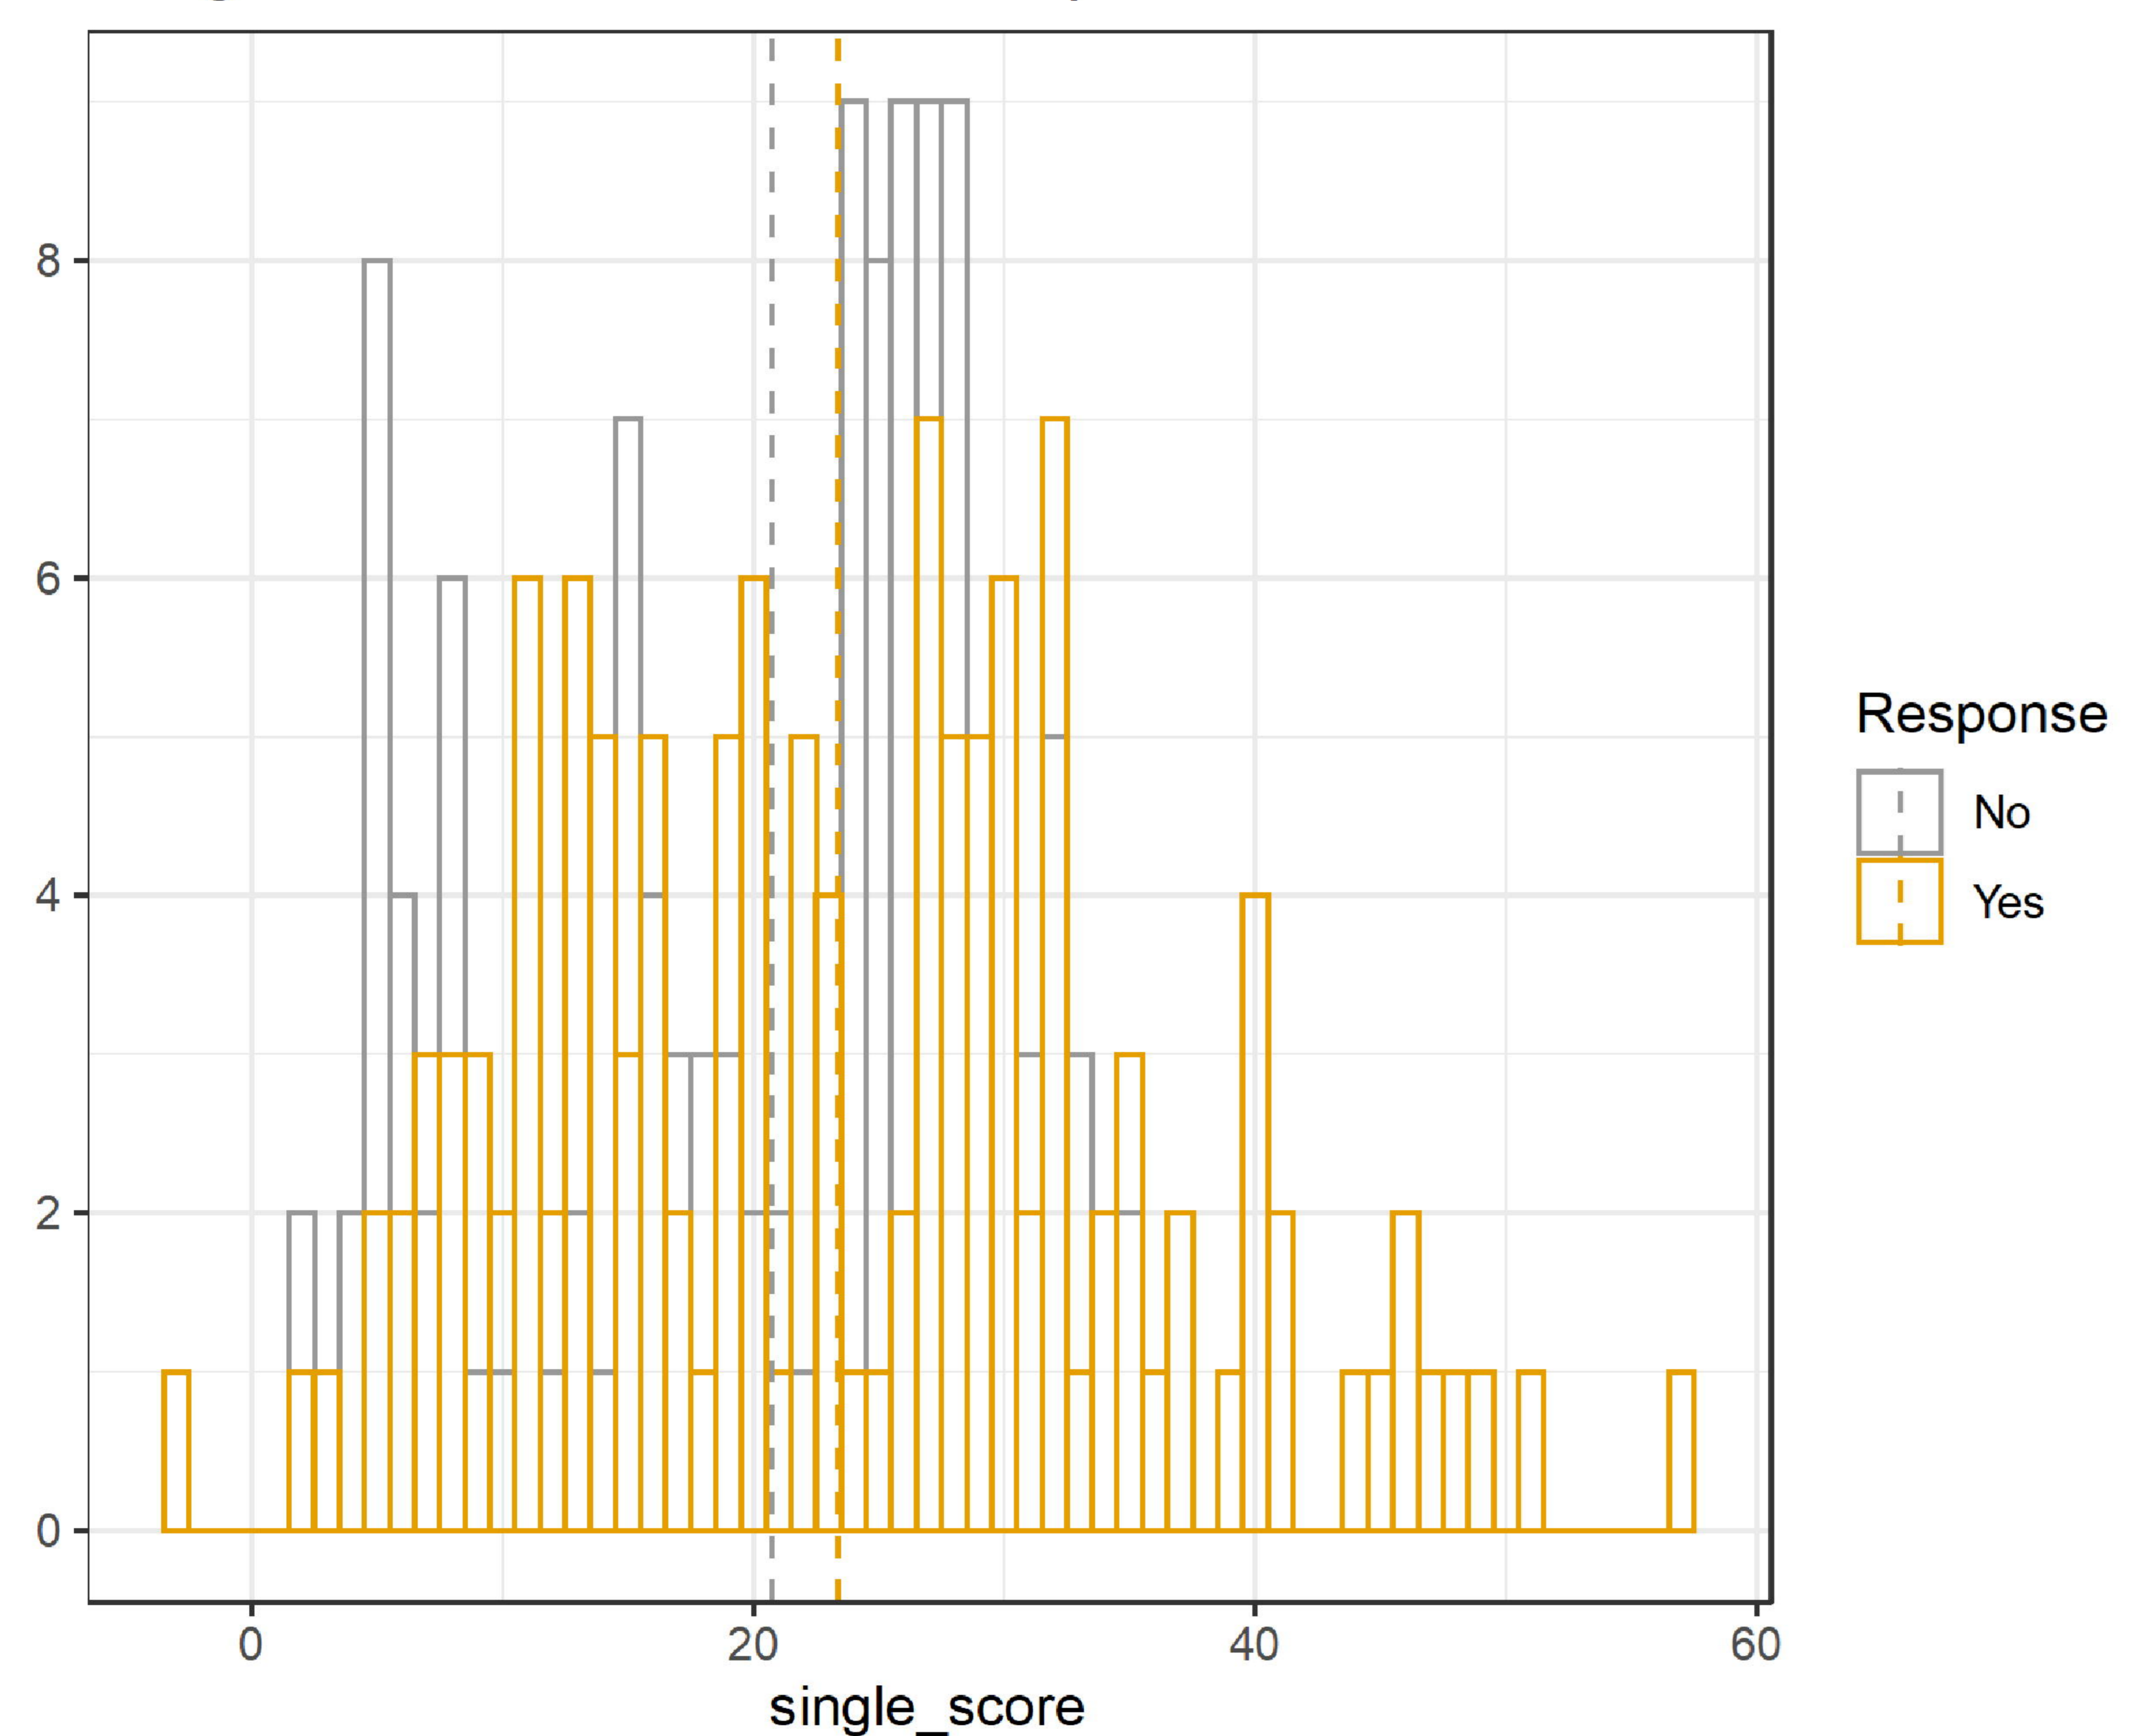

Wilcoxon p-value = 0.12

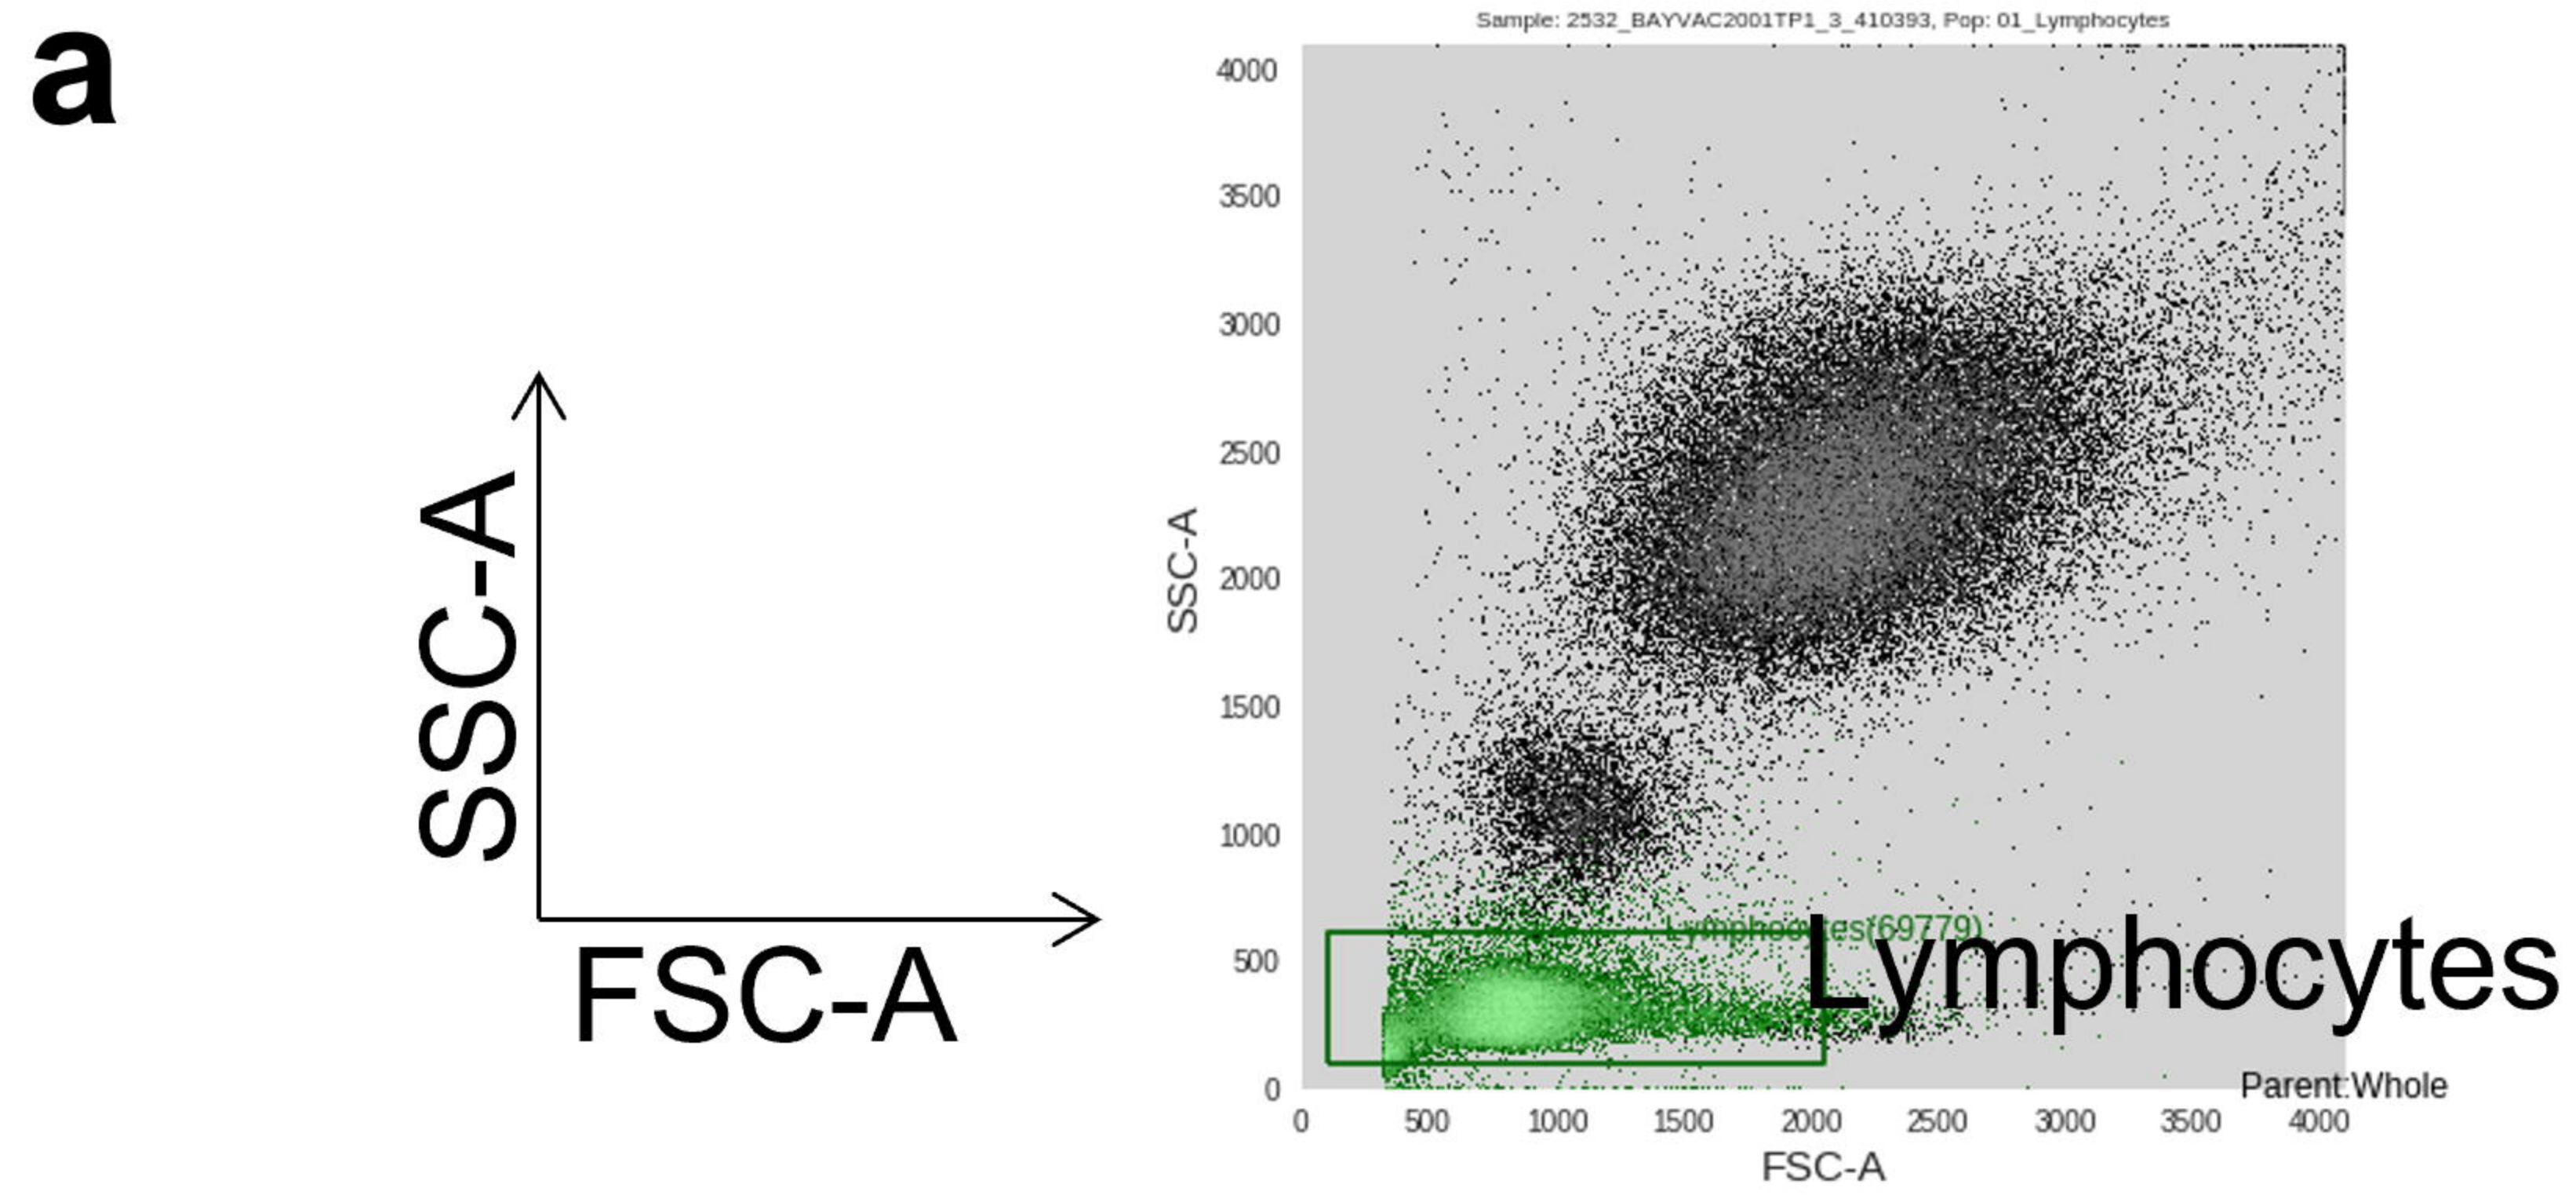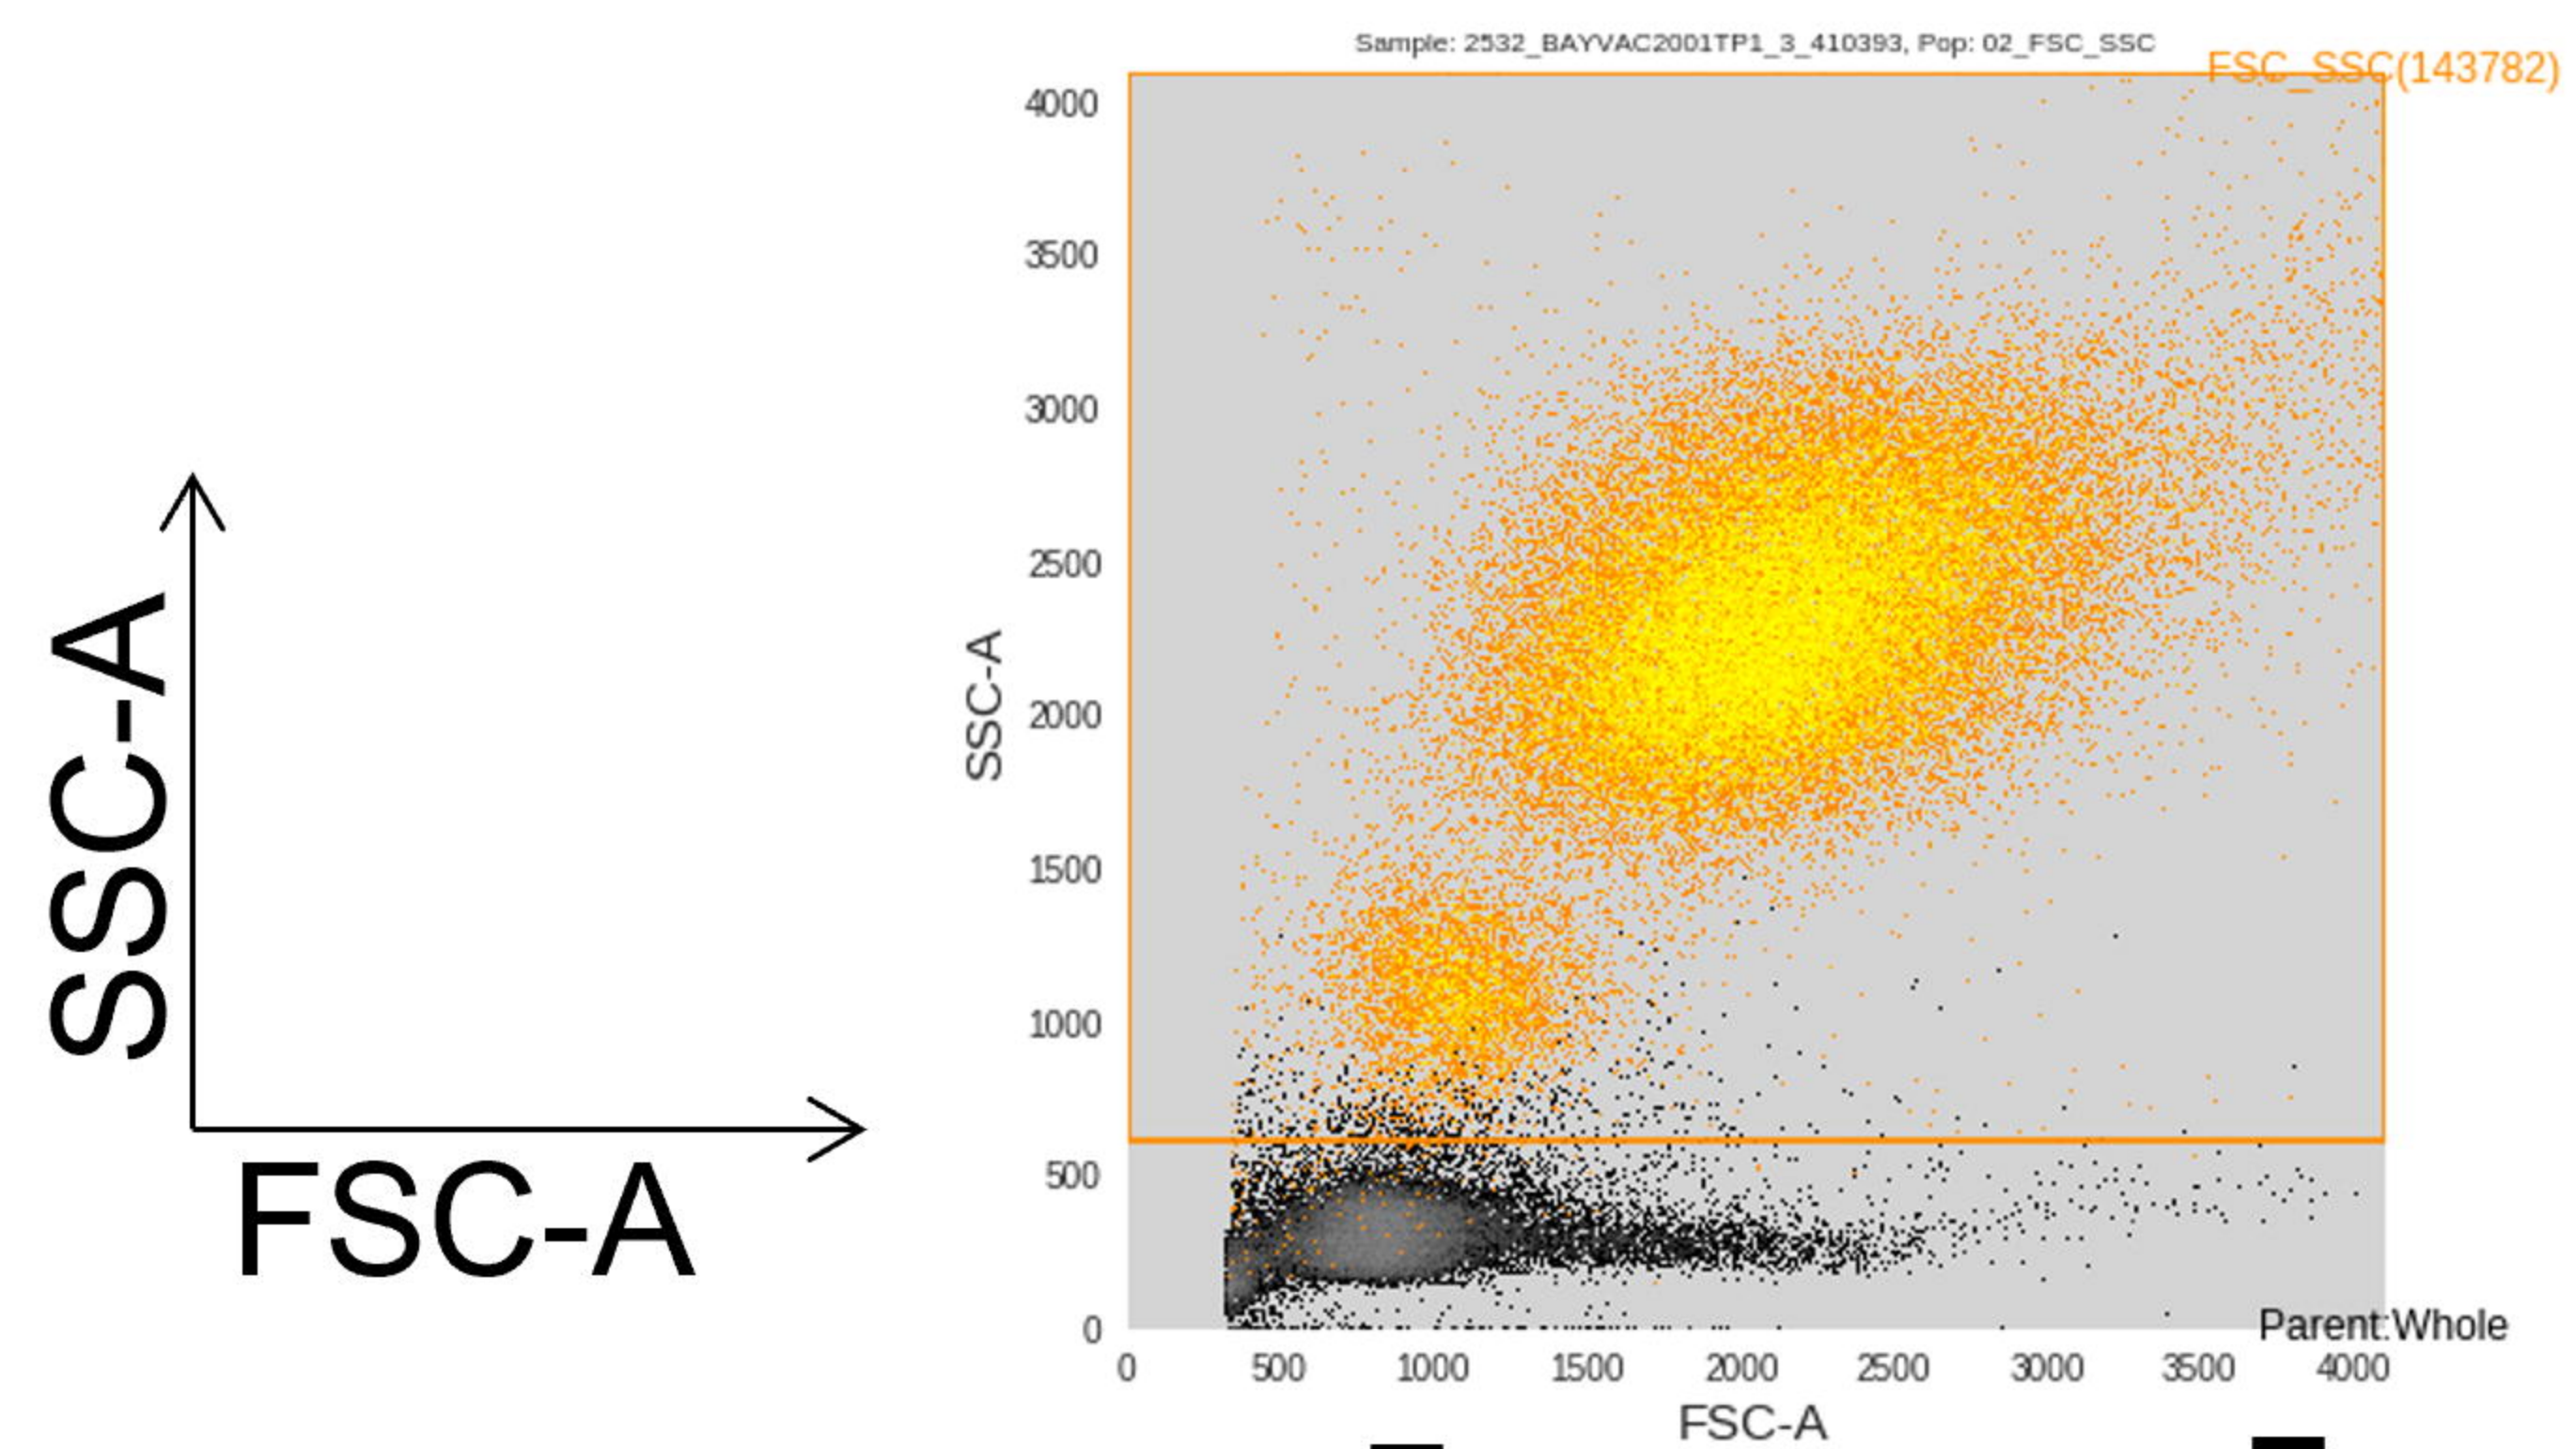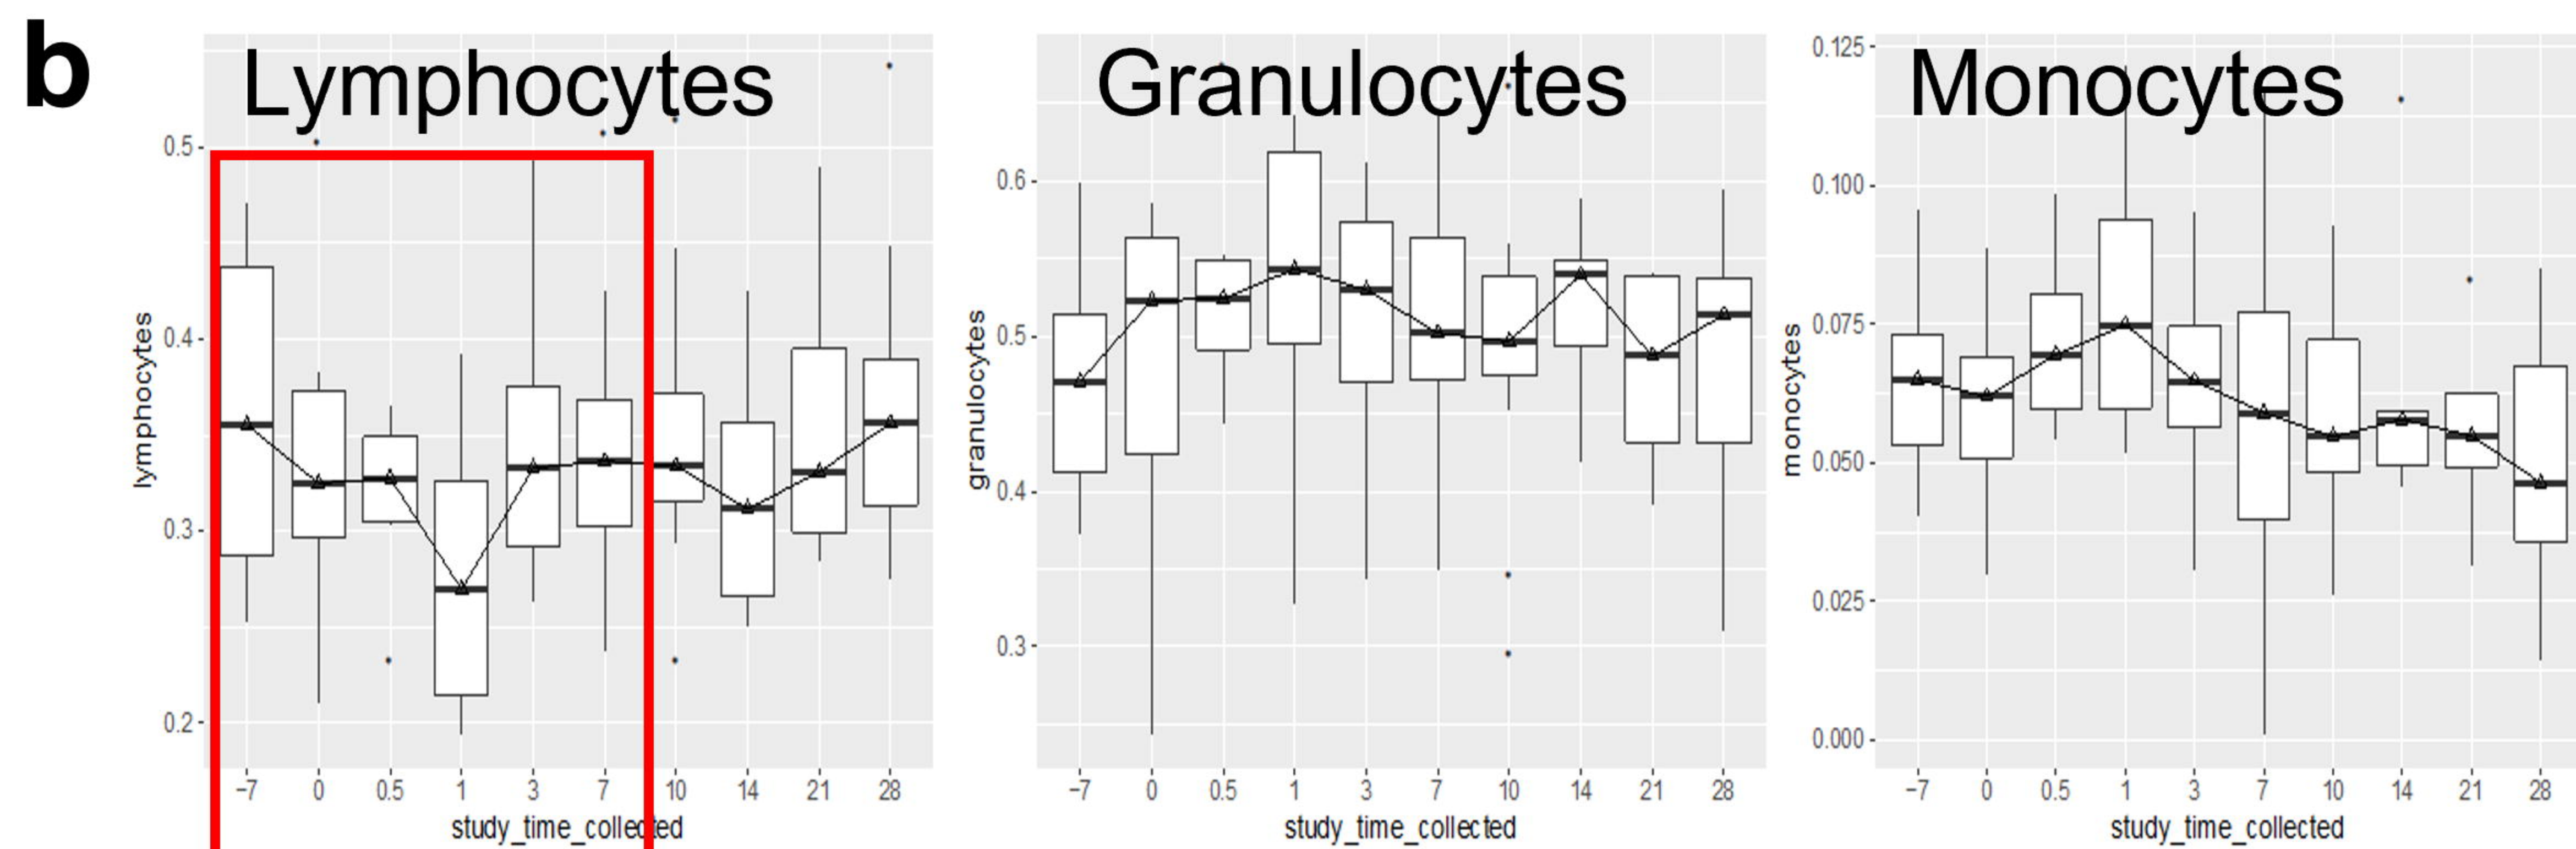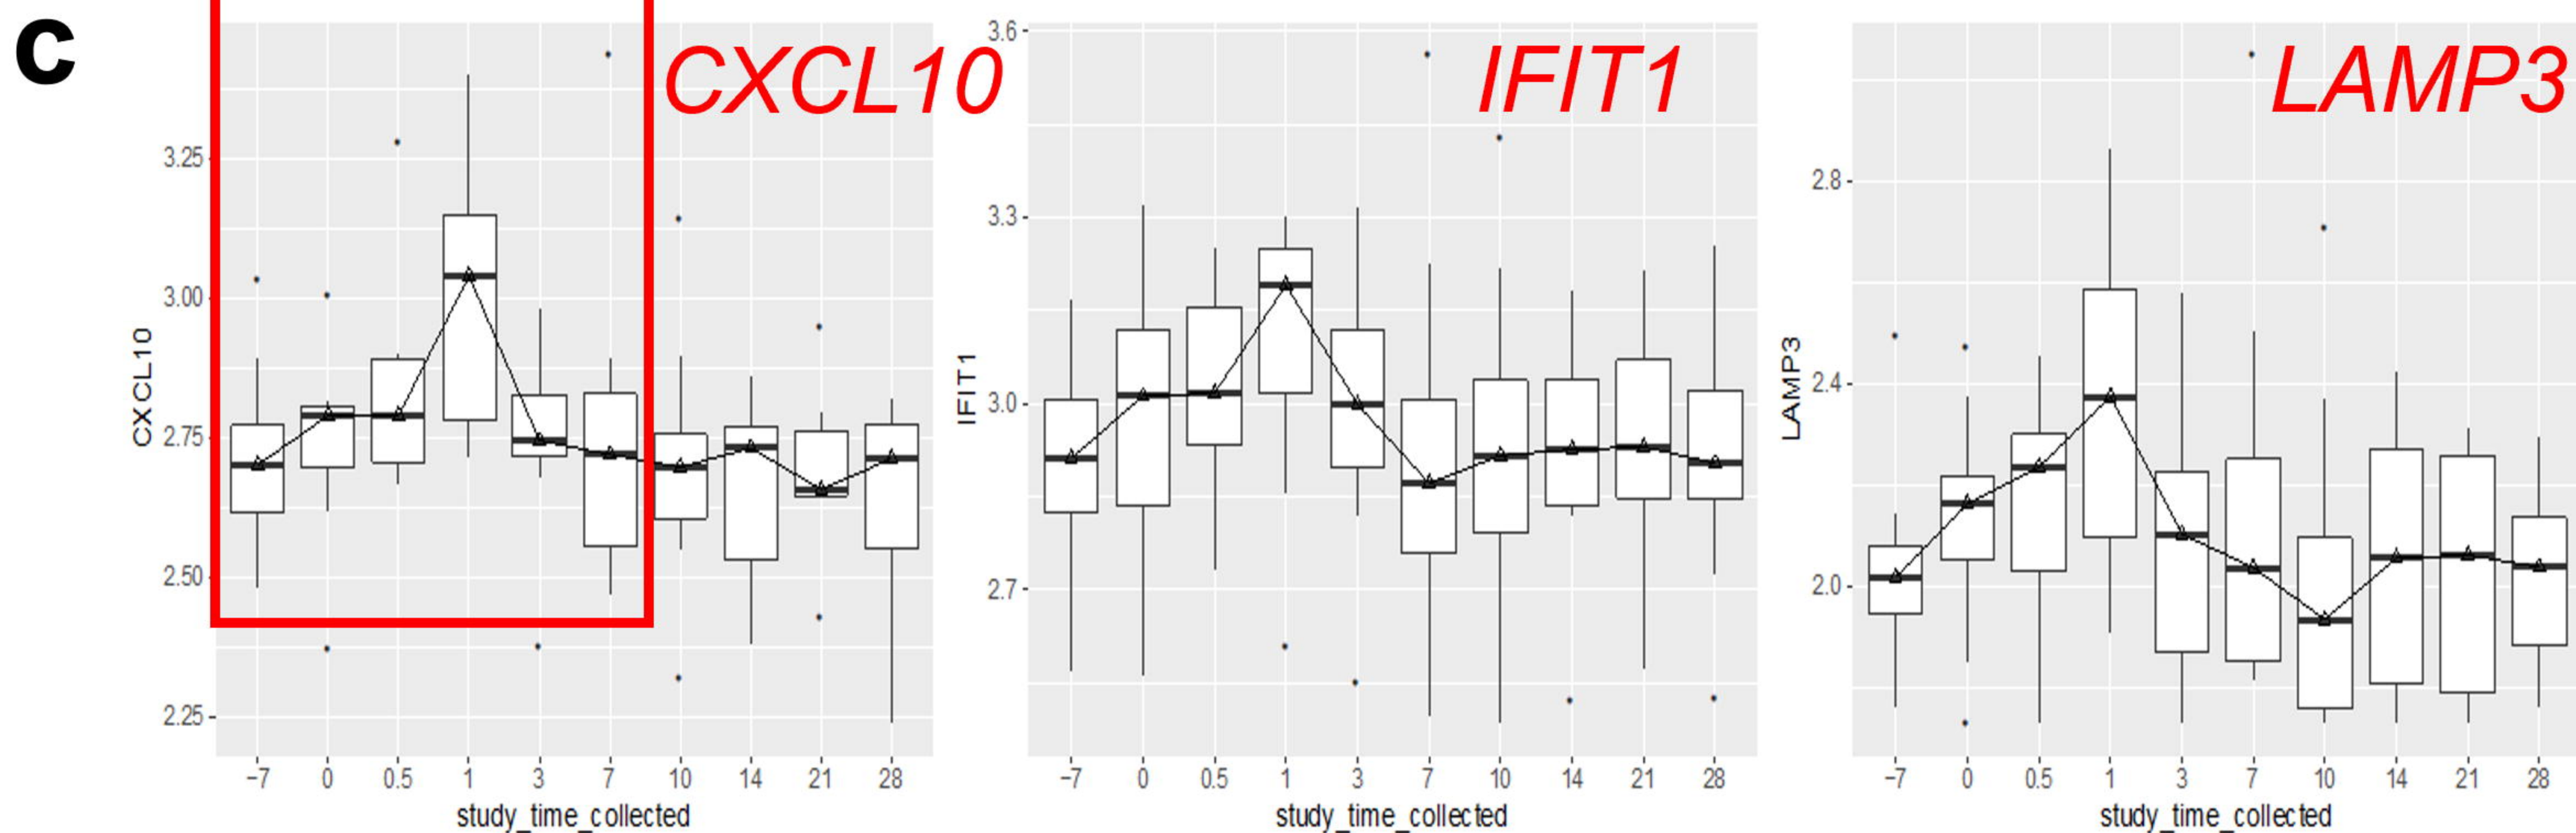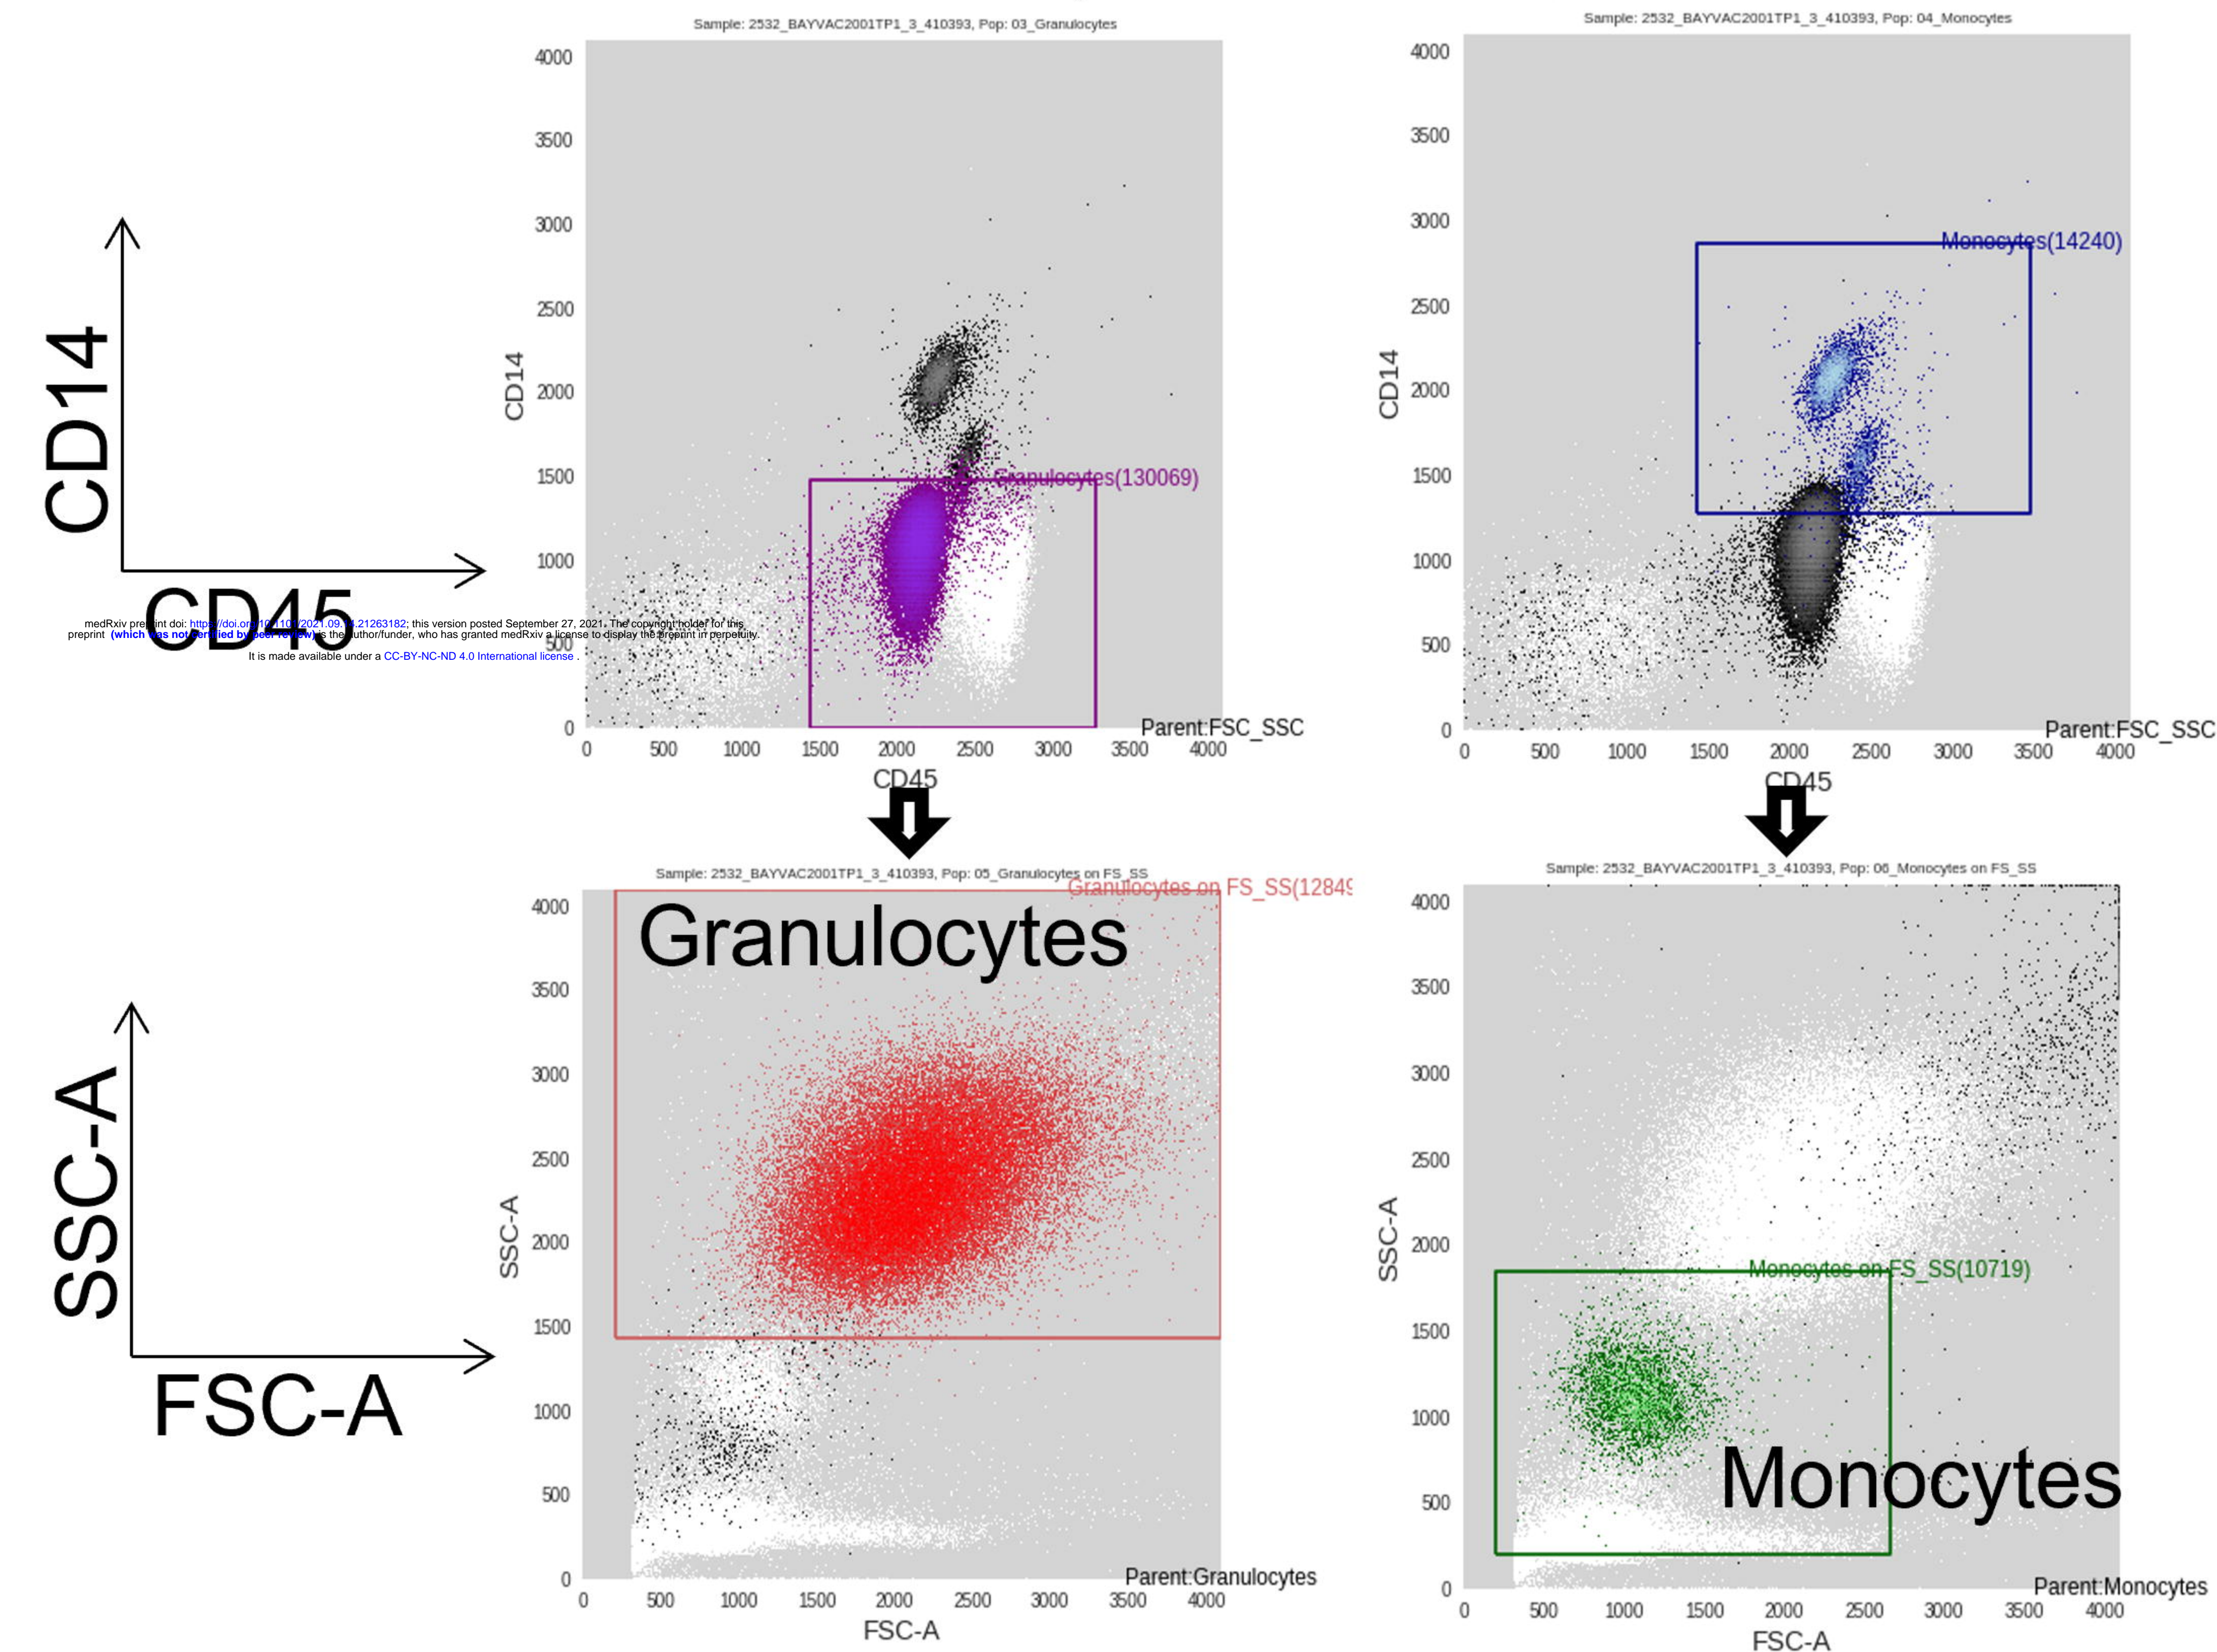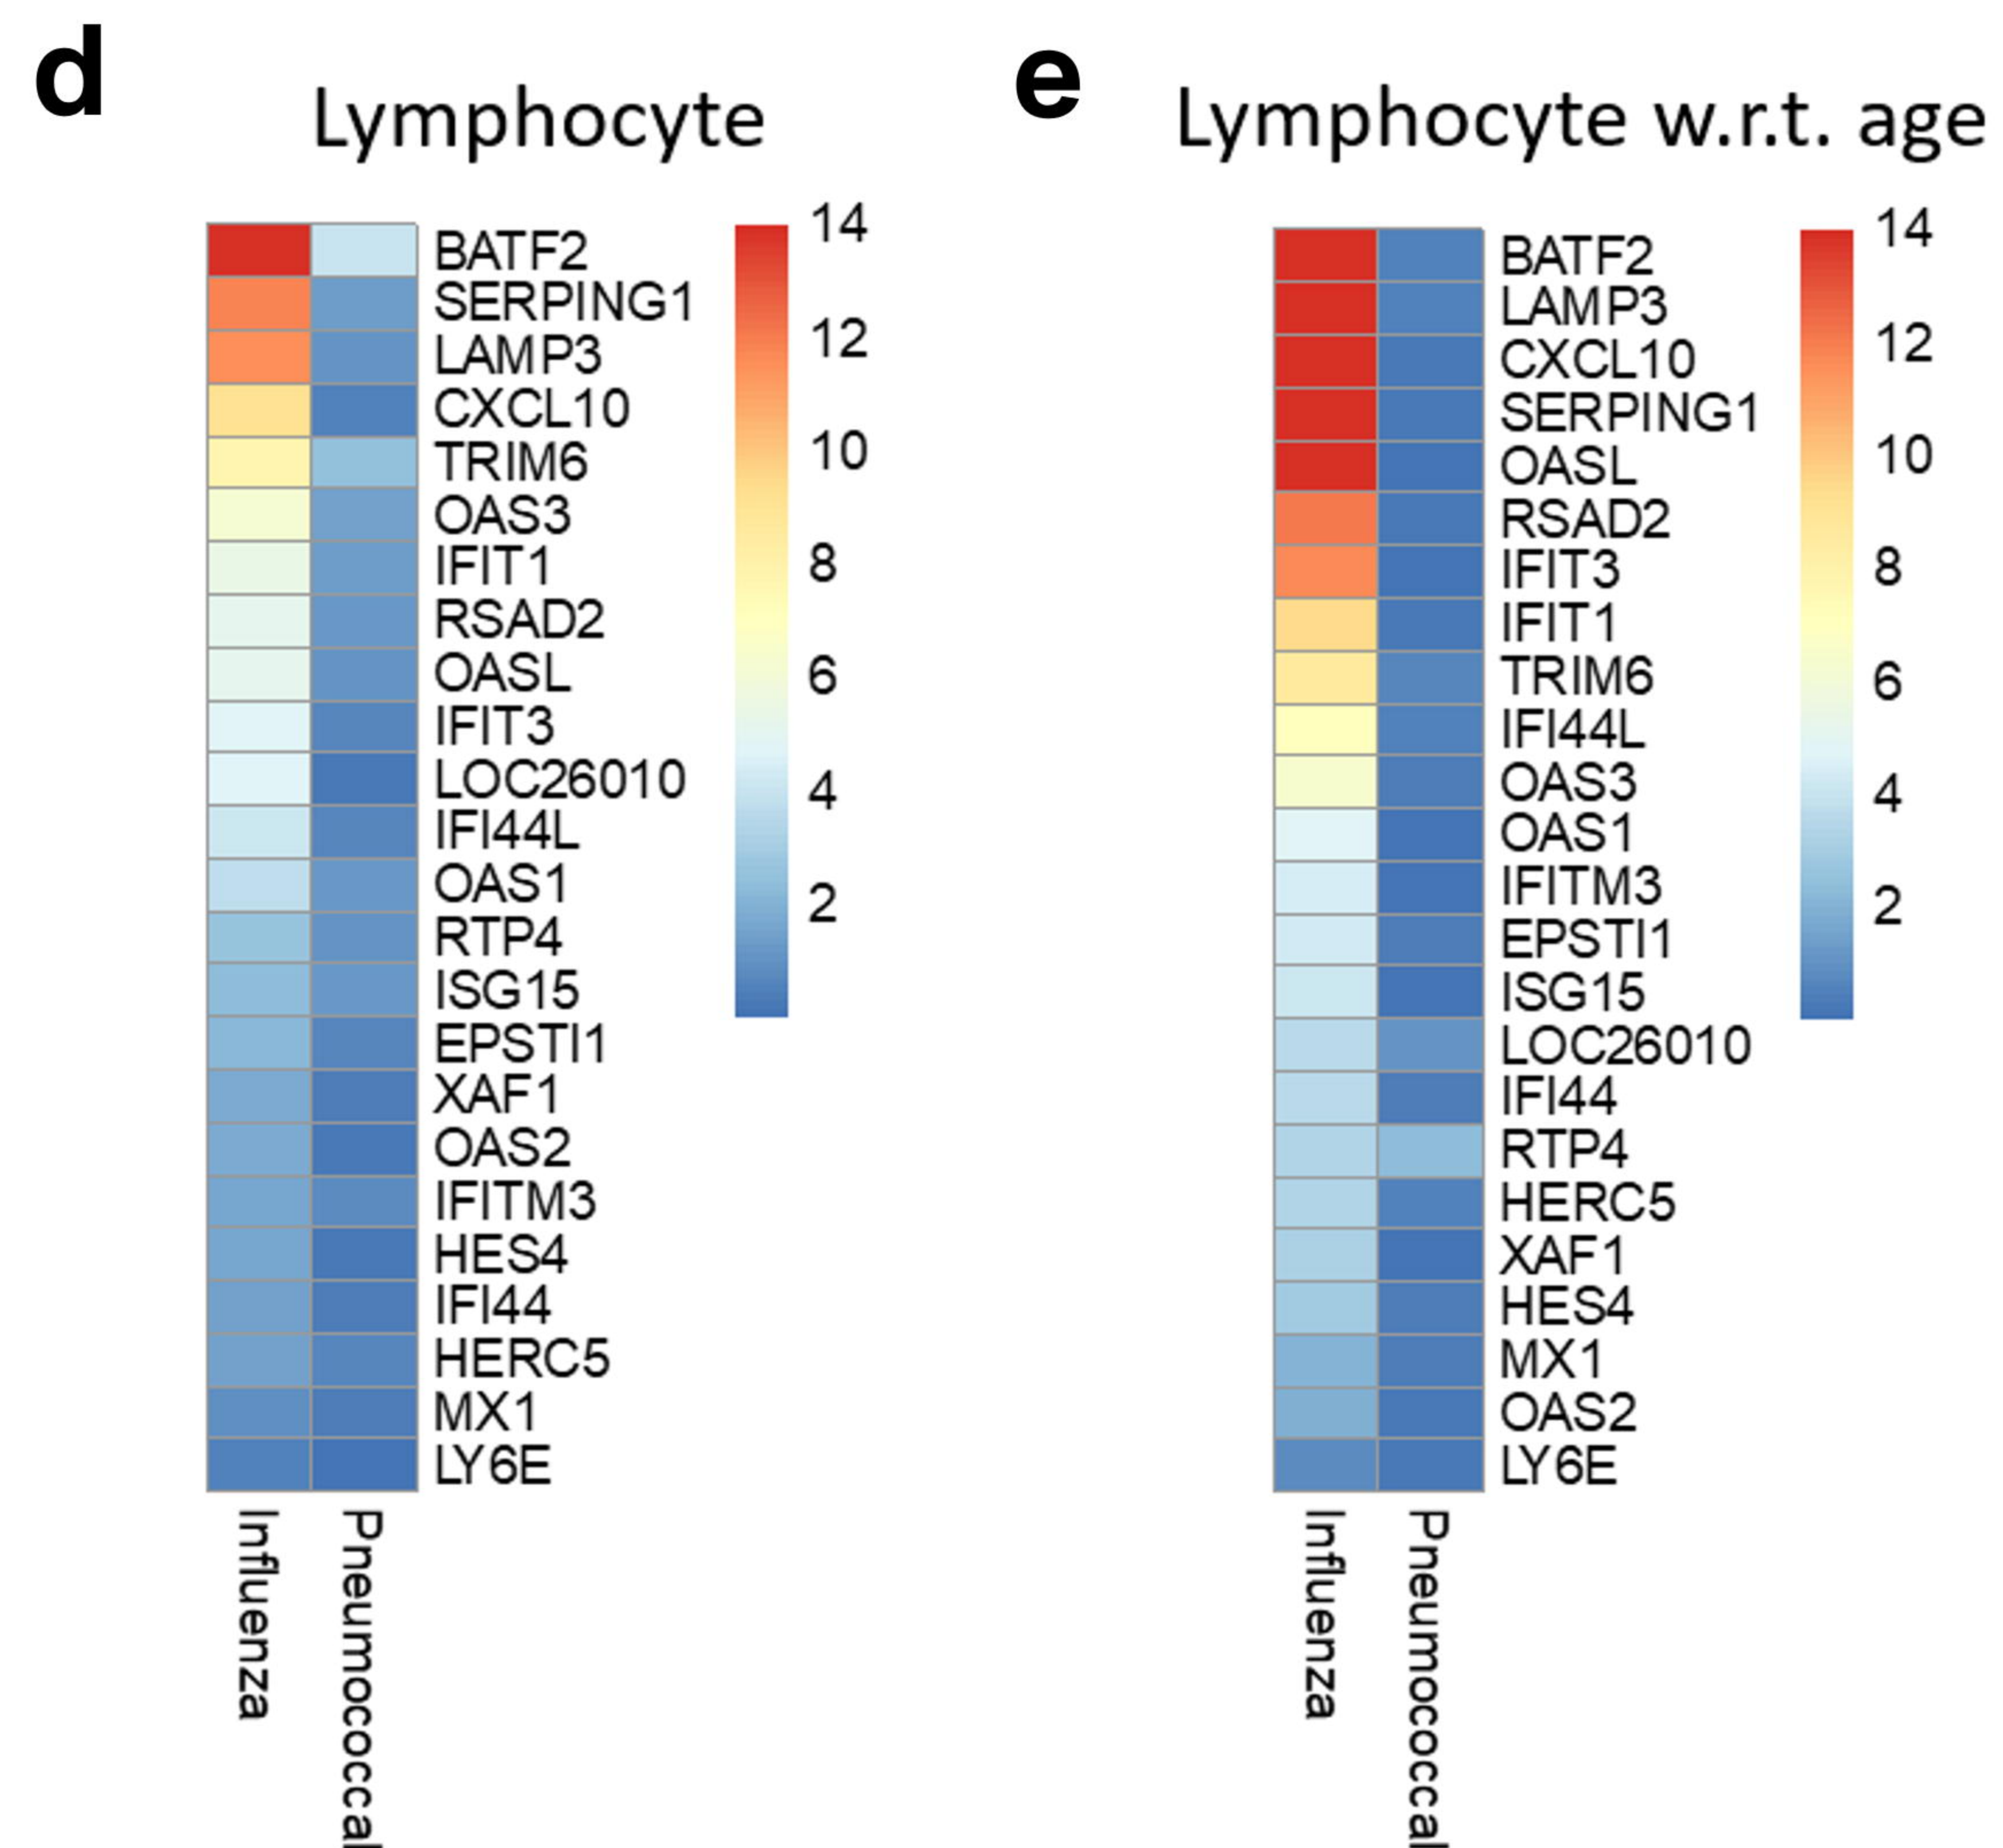



**a**

| Method      | No DEGs |      |         |       | With DEGs |      |         |       |
|-------------|---------|------|---------|-------|-----------|------|---------|-------|
|             | cor=0   |      | cor=0.5 |       | cor=0     |      | cor=0.5 |       |
|             | Time    | MSE  | Time    | MSE   | Time      | MSE  | Time    | MSE   |
| lme4_ind    | 1137.9  | 0.02 | 854.1   | 30.70 | 765.6     | 1.69 | 749.9   | 34.09 |
| lme4        | 8163.6  | 0.22 | 9798.9  | 0.32  | 8378.2    | 2.09 | 9525.6  | 1.96  |
| FastMix_ind | 27.9    | 0.04 | 27.6    | 34.3  | 29.4      | 0.49 | 28.7    | 34.57 |
| FastMix     | 29.3    | 0.20 | 27.5    | 0.21  | 30.8      | 0.68 | 28.8    | 1.16  |

**b**

|                | OLS            | Ridge           | FastMix        |
|----------------|----------------|-----------------|----------------|
| MSE            | 2.708 (0.200)  | 1.765 (0.047)   | 0.919 (0.022)  |
| Cell1          | -0.124 (1.709) | -2.127 (1.821)  | -0.060 (0.979) |
| Cell2          | 0.108 (1.517)  | 0.005 (1.637)   | 0.059 (0.876)  |
| Cell3          | -0.102 (1.520) | -0.122 (1.647)  | -0.124 (0.876) |
| Severity       | -0.089 (0.986) | 3.956 (0.399)   | -0.081 (0.618) |
| Sex            | -0.135 (0.855) | -0.087 (0.360)  | -0.184 (0.544) |
| Cell1.Severity | 0.015 (1.912)  | -34.210 (1.349) | 0.003 (1.014)  |
| Cell2.Severity | 0.252 (2.107)  | 9.125 (1.438)   | 0.212 (1.238)  |
| Cell3.Severity | 0.047 (1.895)  | 8.986 (1.348)   | 0.068 (1.014)  |
| Cell1.Sex      | -0.015 (1.874) | -0.308 (1.291)  | 0.183 (0.994)  |
| Cell2.Sex      | -0.015 (2.078) | 0.063 (1.390)   | -0.042 (1.188) |
| Cell3.Sex      | 0.287 (1.866)  | 0.298 (1.293)   | 0.218 (0.996)  |

**c**

| cor = 0   | Type-I Error | csSAM         | FastMix     |
|-----------|--------------|---------------|-------------|
|           | Cell1.Group  | 28.99 (11.19) | 6.36 (1.11) |
|           | Cell2.Group  | 17.23 (7.70)  | 6.31 (1.09) |
|           | Cell3.Group  | 13.05 (7.61)  | 5.04 (0.21) |
| cor = 0.5 | Type-I Error | csSAM         | FastMix     |
|           | Cell1.Group  | 17.34 (9.11)  | 6.85 (0.42) |
|           | Cell2.Group  | 9.71 (5.97)   | 6.85 (0.46) |
|           | Cell3.Group  | 6.86 (5.54)   | 5.00 (0.23) |

**d**

| cor = 0   | Power       | csSAM         | FastMix      |
|-----------|-------------|---------------|--------------|
|           | Cell1.Group | 56.48 (17.75) | 61.86 (4.11) |
|           | Cell2.Group | 40.54 (16.88) | 62.79 (4.36) |
| cor = 0.5 | Power       | csSAM         | FastMix      |
|           | Cell1.Group | 62.82 (15.18) | 64.22 (6.50) |
|           | Cell2.Group | 46.72 (14.88) | 64.68 (6.31) |

**e**

| Comp. Time | csSAM  | FastMix |
|------------|--------|---------|
| cor = 0    | 209.05 | 20.82   |
| cor = 0.5  | 206.96 | 19.95   |
